# Supplementary material for: Color-tunable arylaminoanthraquinone dyes through hydrogen-bond-assisted charge transfer interaction
Source: Royal Society of Chemistry journal article supplement (doi:10.1039/d1ra03985g), 2021-01-01
Supplement: d1ra03985g1.pdf [file d1ra03985g1.pdf]

**Electronic Supplementary Information for**

**Color-Tunable Arylaminoanthraquinone Dyes through**

**Hydrogen-Bond-Assisted Charge Transfer Interaction**

Takashi Takeda,<sup>\*1,2</sup> Yotaro Kasahara,<sup>2</sup> and Tomoyuki Akutagawa<sup>1,2</sup>

<sup>1</sup> *Institute of Multidisciplinary Research for Advanced Materials, Tohoku University,  
Sendai, Miyagi 980-8577, Japan*

<sup>2</sup> *Department of Applied Chemistry, Graduate School of Engineering, Tohoku University,  
Sendai, Miyagi, 980-8579, Japan*

**CONTENTS**

|                                                                               | <b>Page</b> |
|-------------------------------------------------------------------------------|-------------|
| 1. ORTEP drawing of 22 .....                                                  | S2          |
| 2. Cyclic voltammograms of 1-23 classified according to the substituent ..... | S2-S3       |
| 3. HOMO and LUMO of 1-6, 11, 13-23 .....                                      | S3-5        |
| 4. <sup>1</sup> H and <sup>13</sup> C NMR spectra of new compounds .....      | S6-S19      |
| 5. Cartesian coordinates of the optimized structures of 1-23 .....            | S22-S47     |

## 1. ORTEP drawing of 22

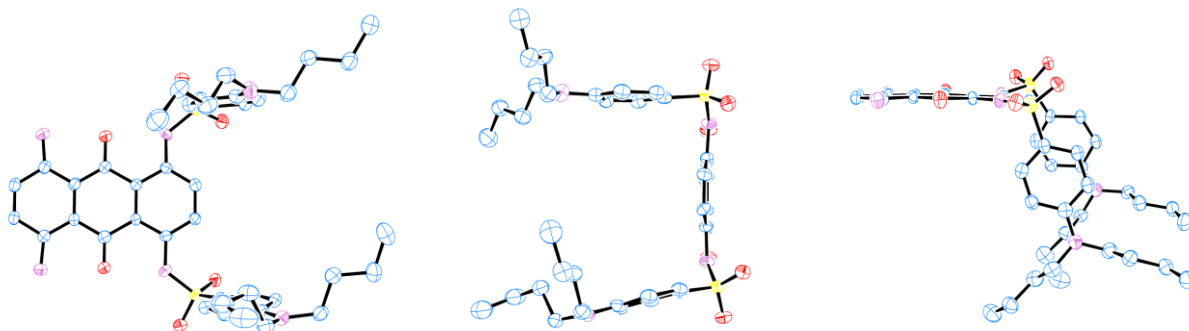

**Figure S1** ORTEP drawing of **22**. Front view (left), side view (center) and top view (right). Displacement ellipsoids are drawn at the 50% probability level. Hydrogen atoms were omitted for clarity.

## 2. Cyclic voltammograms of 1-23 classified according to the substituent

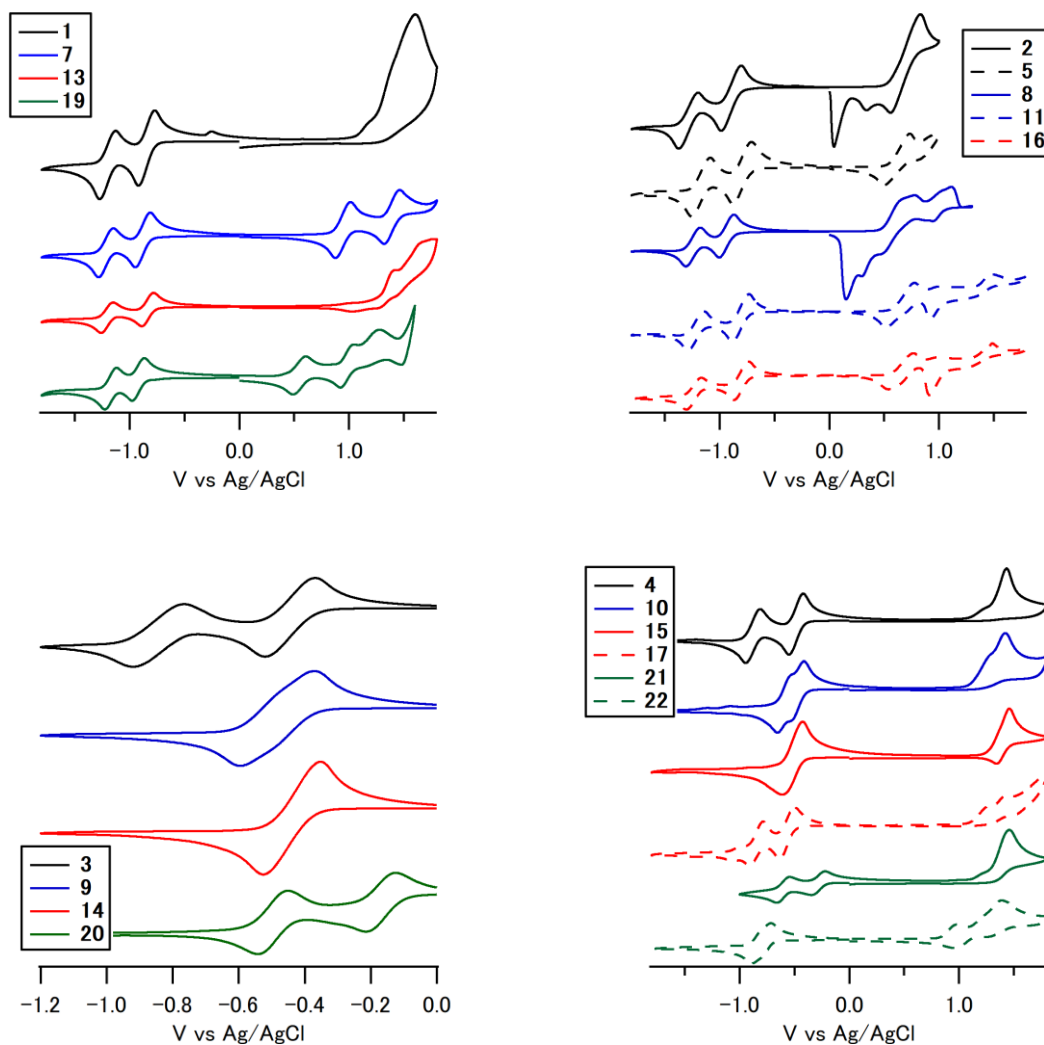

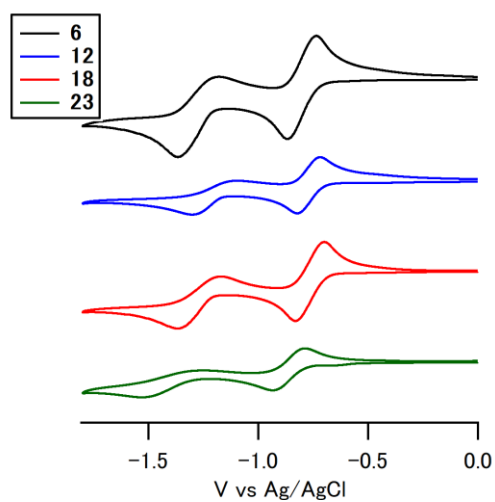

**Figure S2** Cyclic voltammograms measured in  $\text{CH}_2\text{Cl}_2$  classified according to the substituent. The color was determined according to the substitution position. Dotted line indicates monochloro-monosubstituted derivatives or diamino-disubstituted derivative.

### 3. HOMO and LUMO of 1-6, 11, 13-23

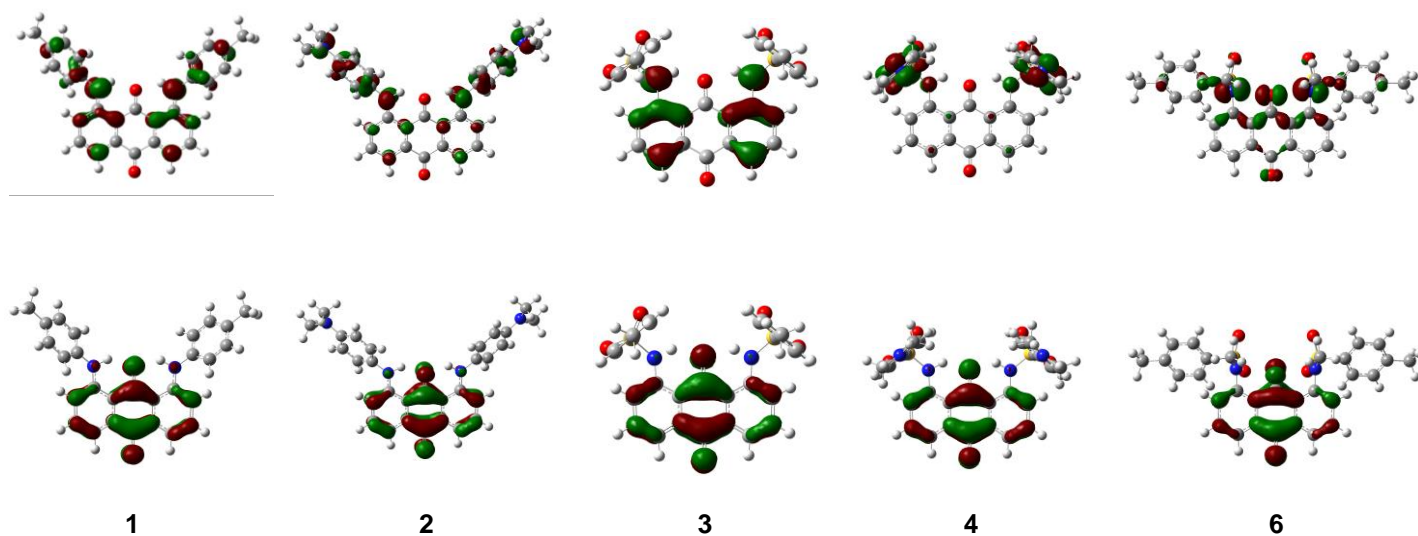

**Figure S3** HOMO (top) and LUMO (bottom) of 1,8-disubstituted anthraquinones **1-4** and **6**.

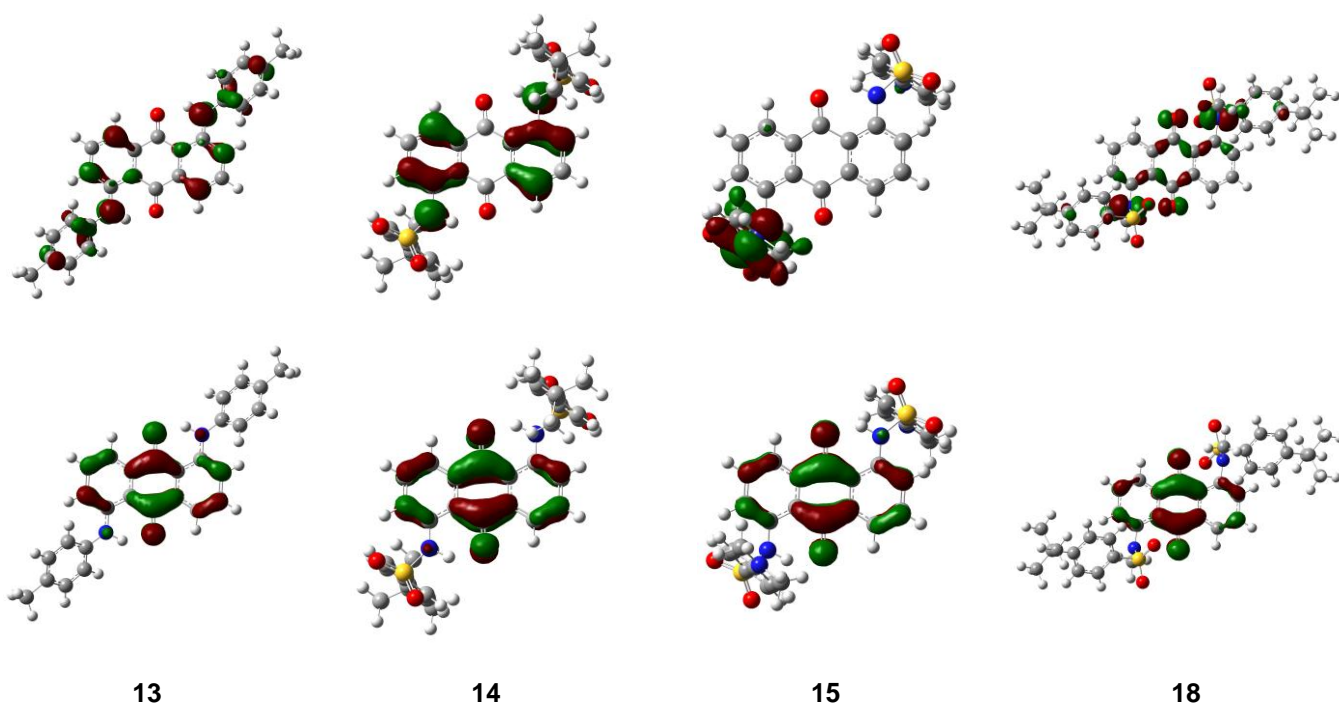

**Figure S4** HOMO (top) and LUMO (bottom) of 1,5-disubstituted anthraquinones **13-15** and **18**.

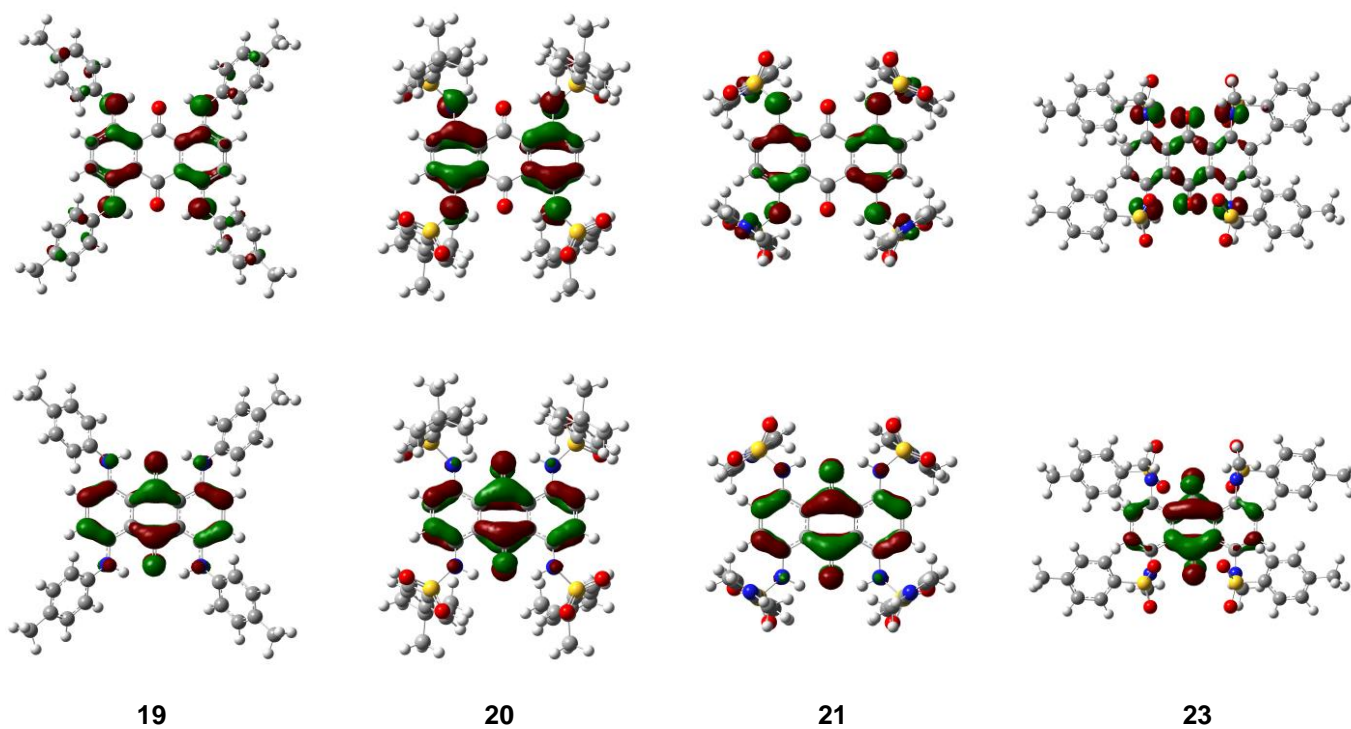

**Figure S5** HOMO (top) and LUMO (bottom) of 1,4,5,8-tetrasubstituted anthraquinones **19-21** and **23**.

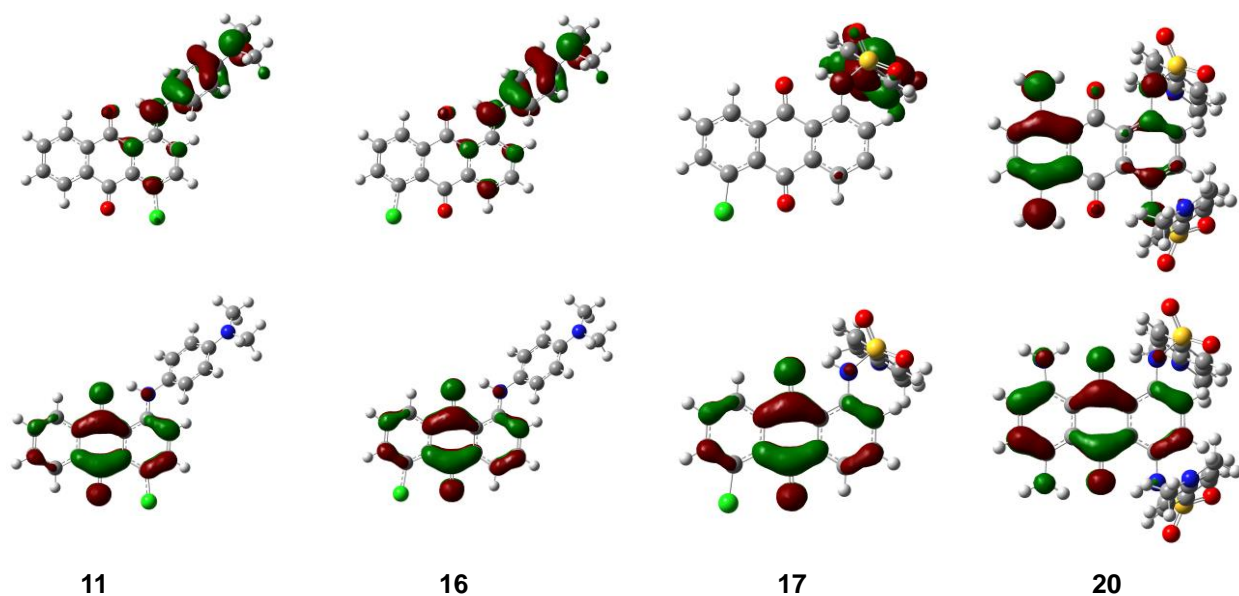

**Figure S6** HOMO (top) and LUMO (bottom) of monochloro-monosubstituted anthraquinones **11,16,17** and diamino-disubstituted anthraquinone **20**.

#### 4. $^1\text{H}$ and $^{13}\text{C}$ NMR spectra of new compounds

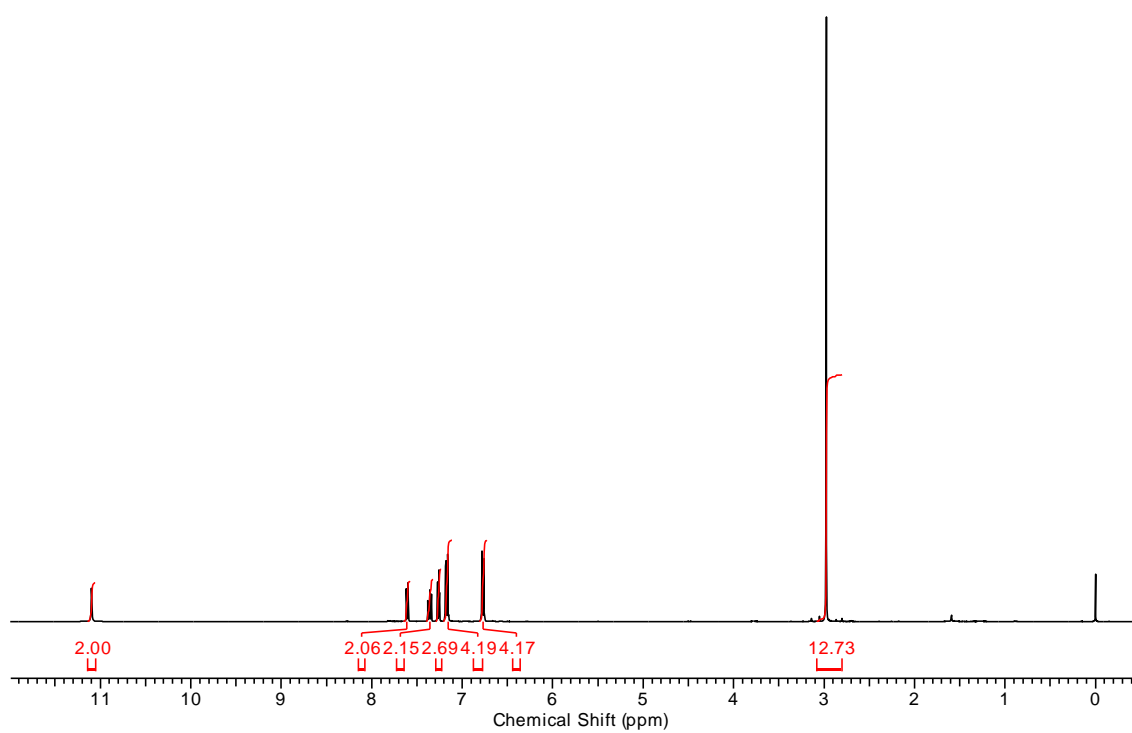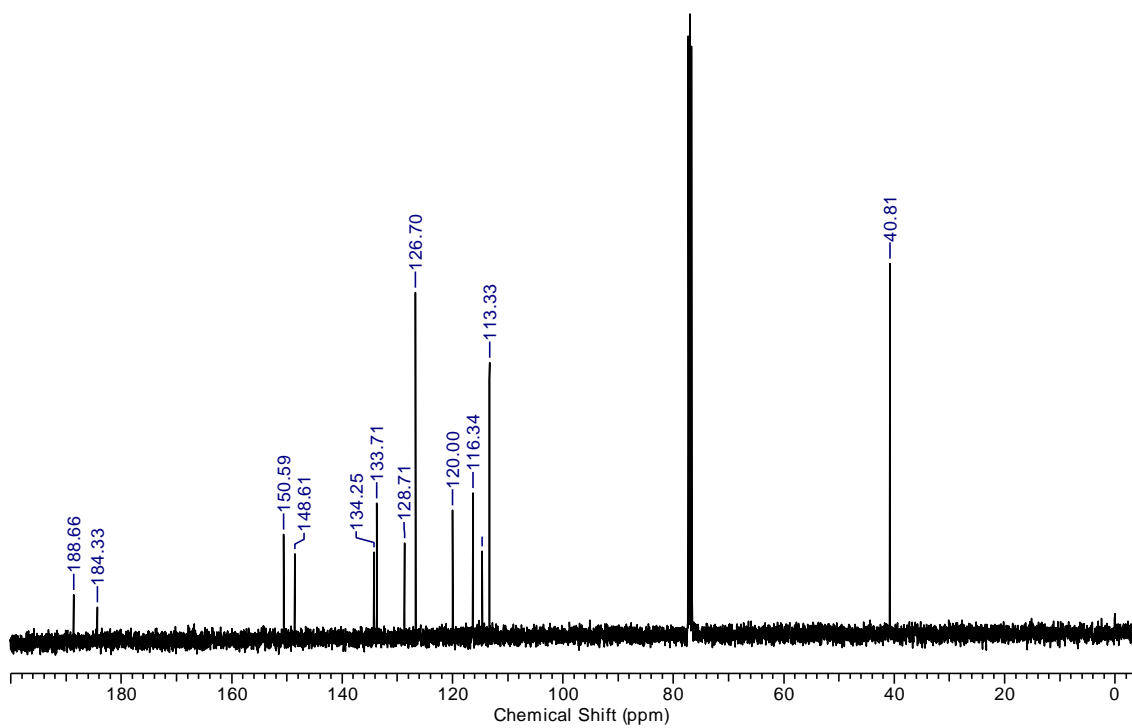

**Figure S7**  $^1\text{H}$  (top) and  $^{13}\text{C}$  (bottom) NMR spectra of **2** in  $\text{CDCl}_3$ .

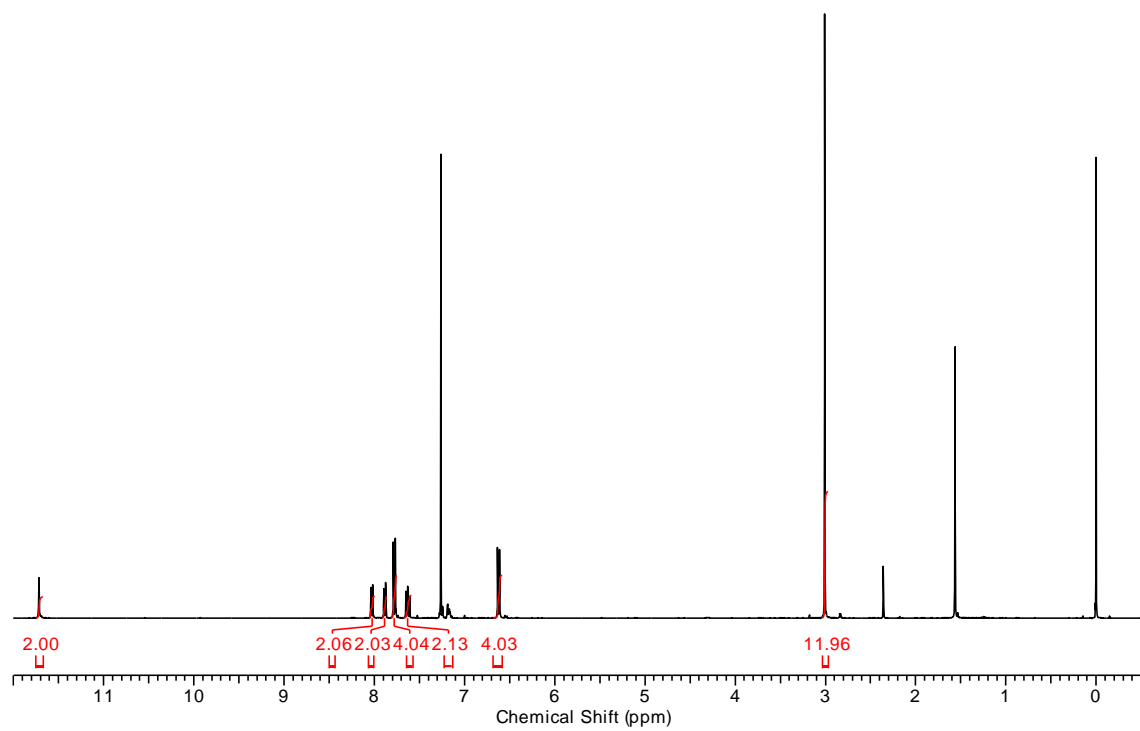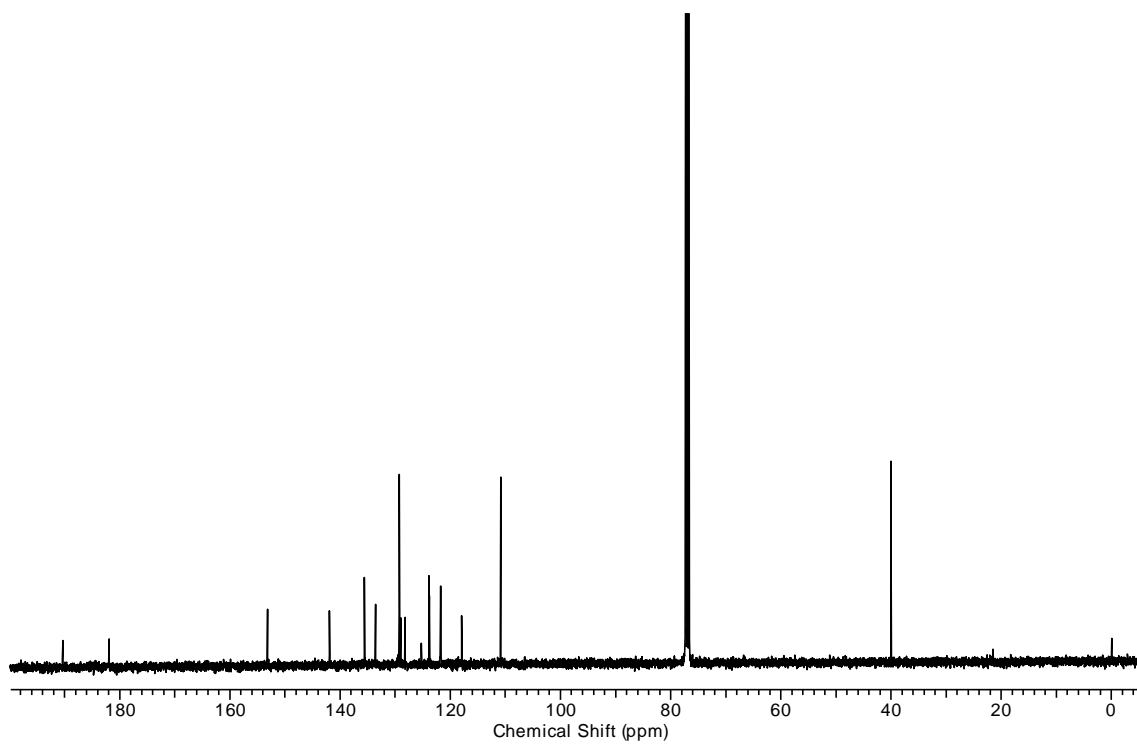

**Figure S8** <sup>1</sup>H (top) and <sup>13</sup>C (bottom) NMR spectra of **4** in CDCl<sub>3</sub>.

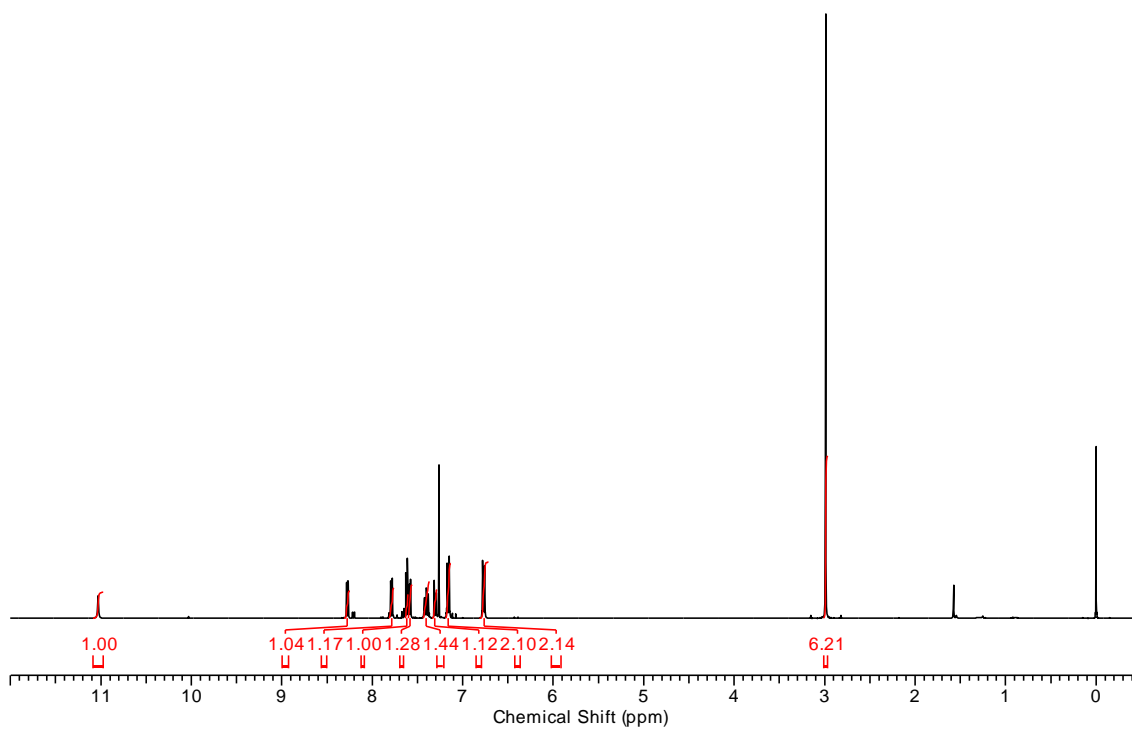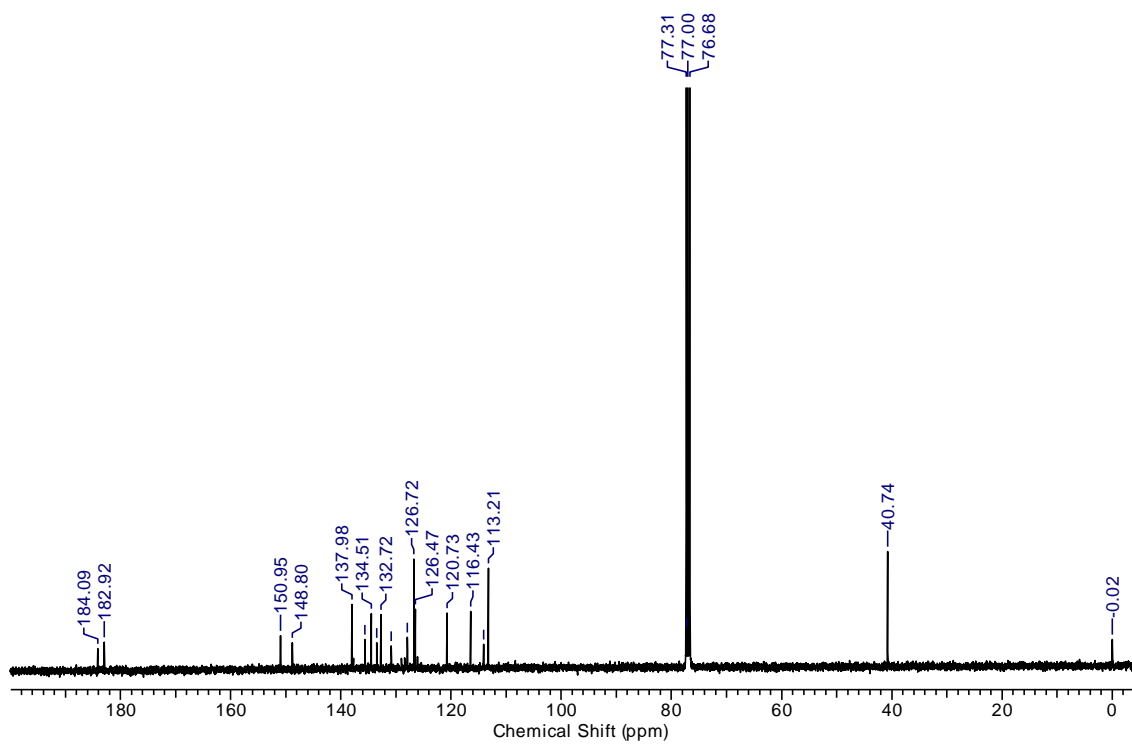

**Figure S9** <sup>1</sup>H (top) and <sup>13</sup>C (bottom) NMR spectra of **5** in CDCl<sub>3</sub>.



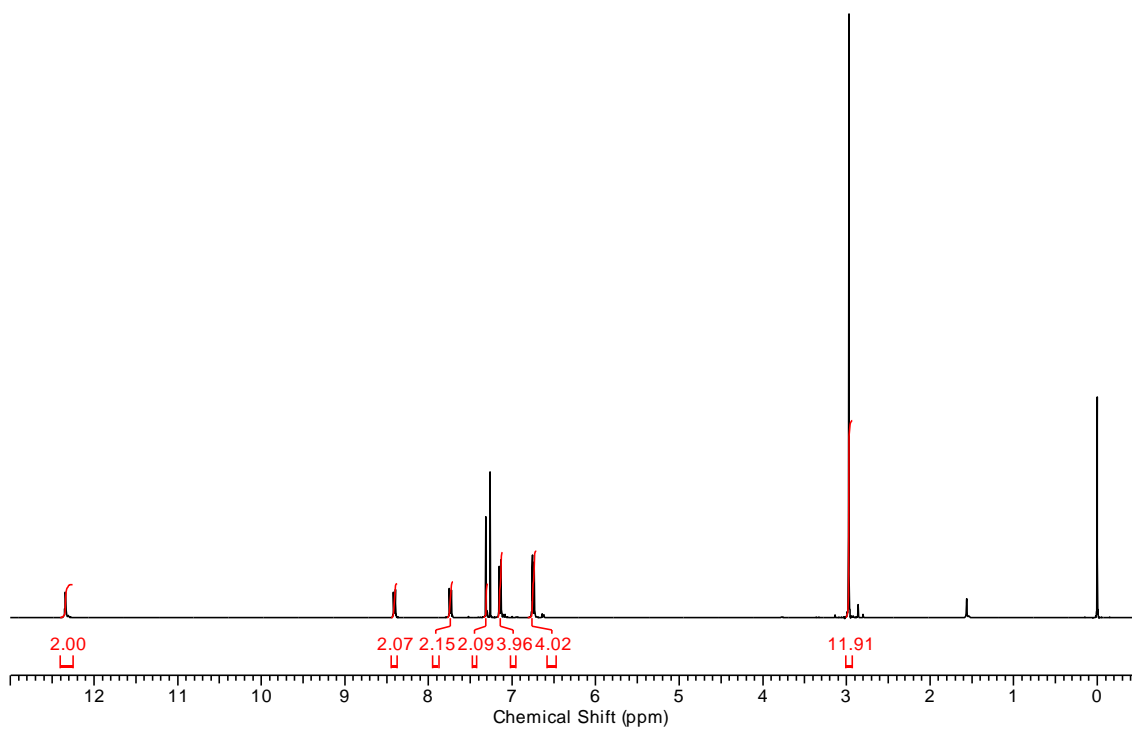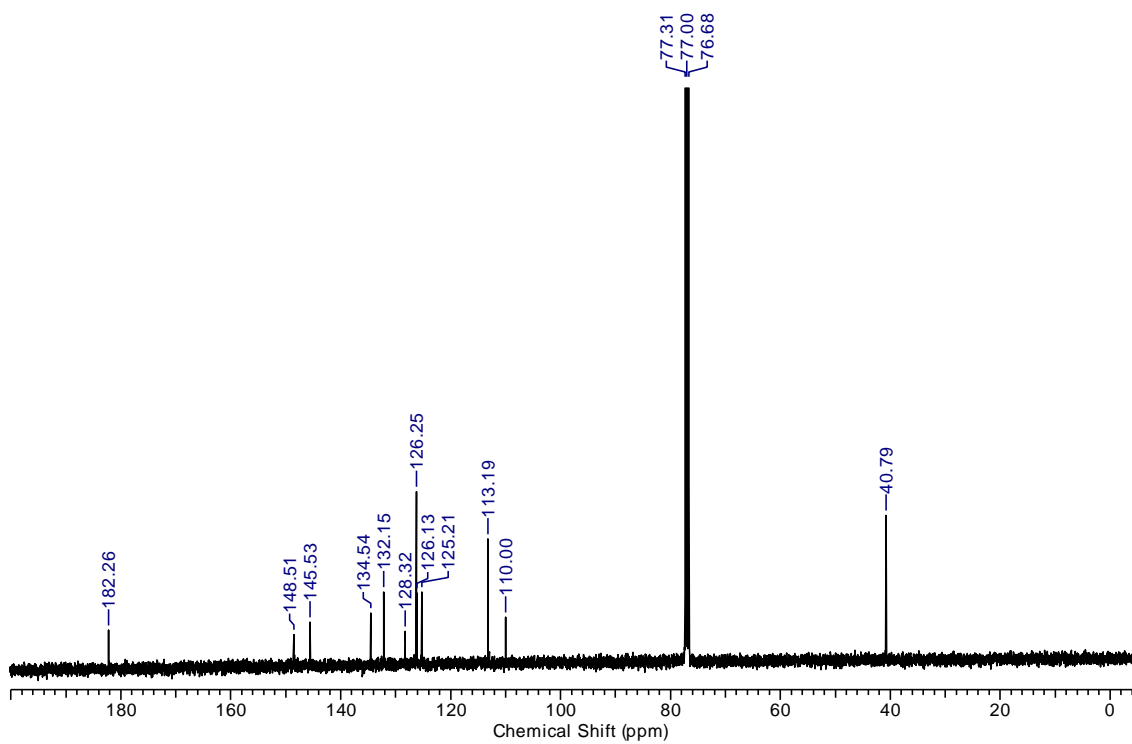

**Figure S10** <sup>1</sup>H (top) and <sup>13</sup>C (bottom) NMR spectra of **8** in CDCl<sub>3</sub>.

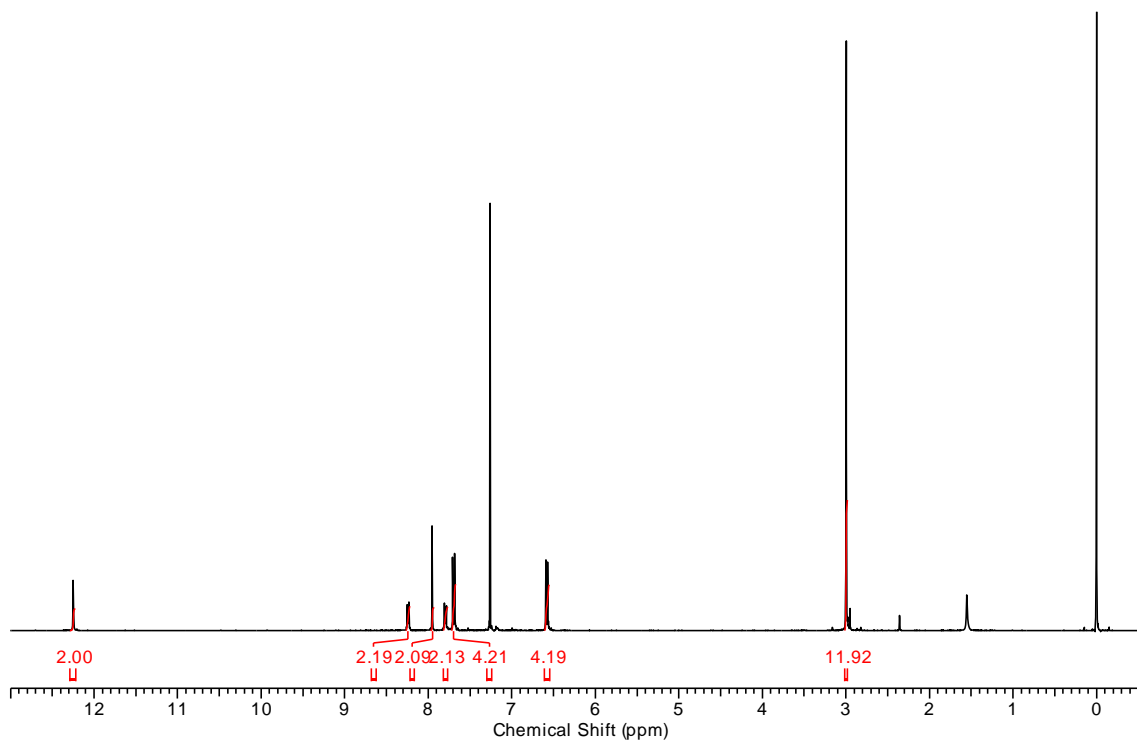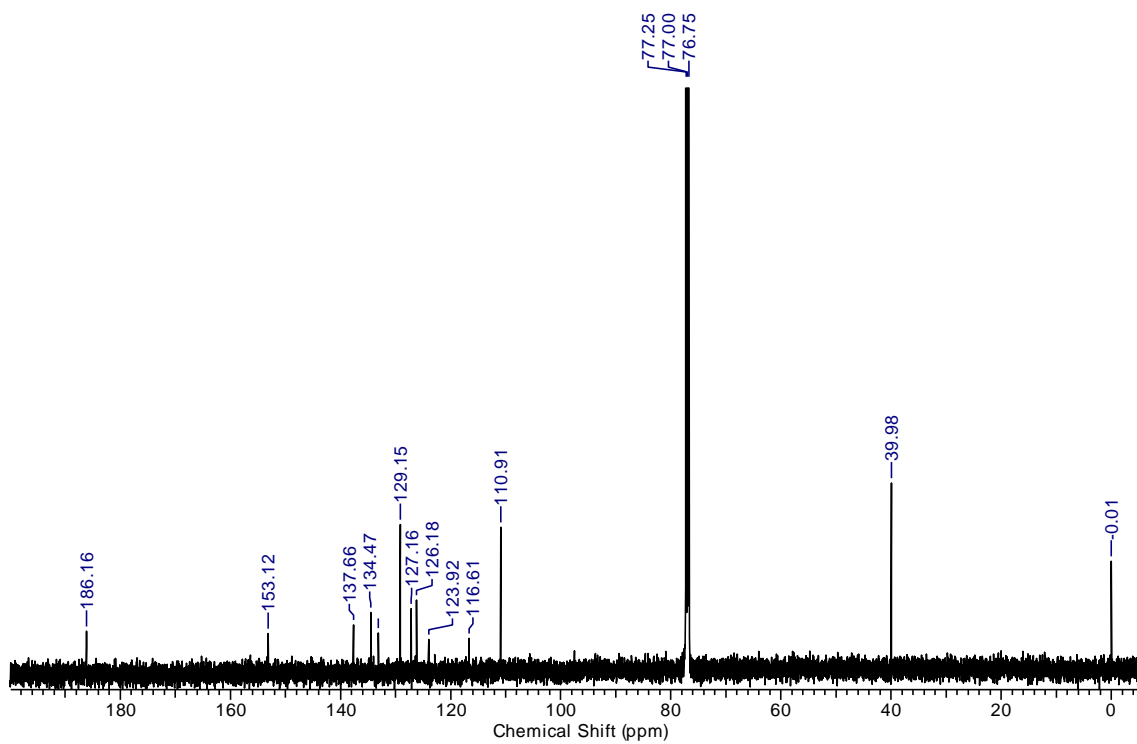

**Figure S11** <sup>1</sup>H (top) and <sup>13</sup>C (bottom) NMR spectra of **10** in CDCl<sub>3</sub>.

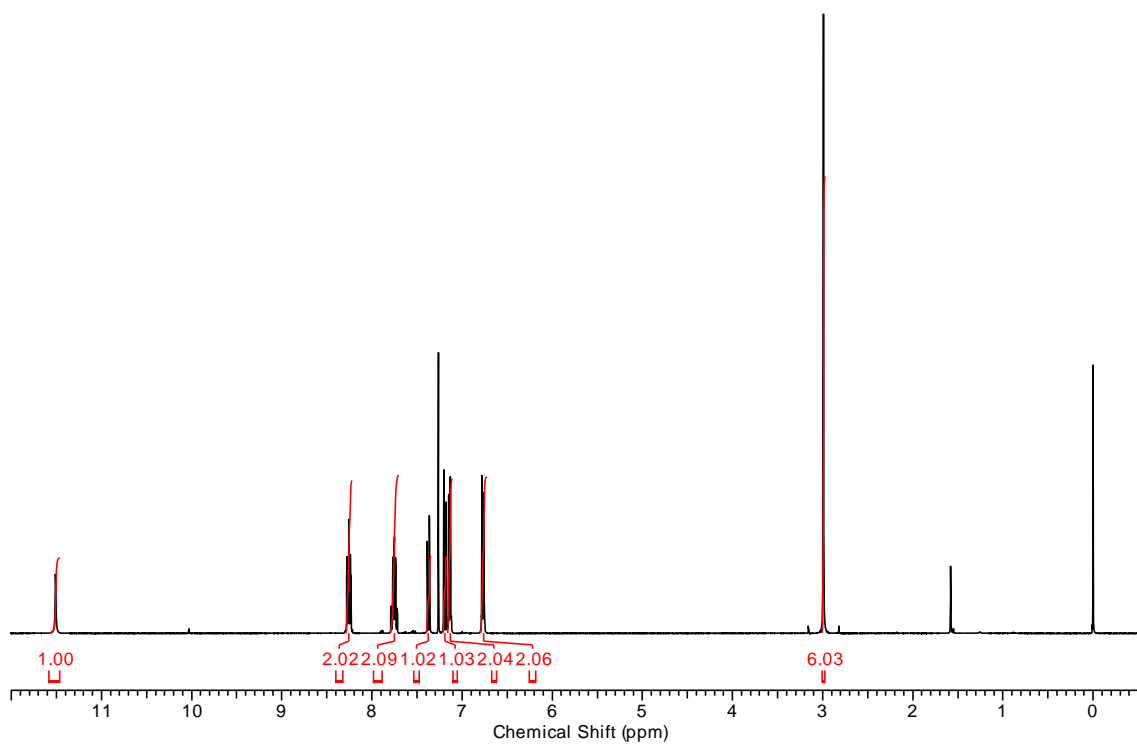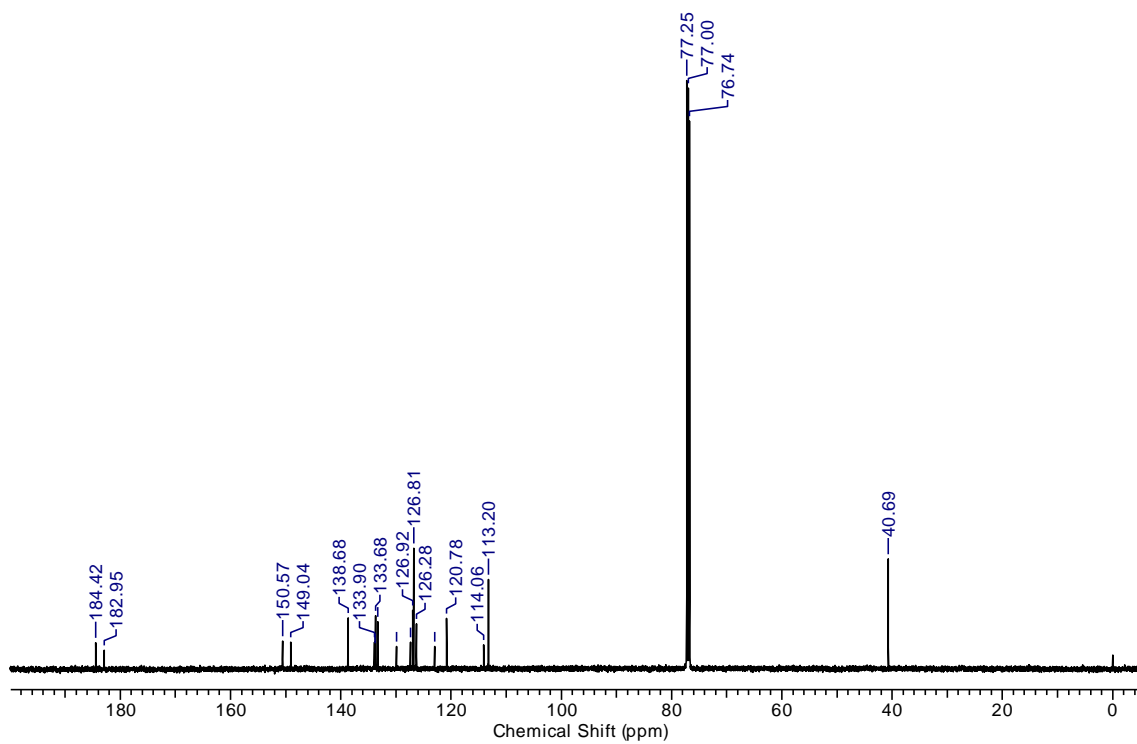

**Figure S12**  $^1\text{H}$  (top) and  $^{13}\text{C}$  (bottom) NMR spectra of **11** in  $\text{CDCl}_3$ .

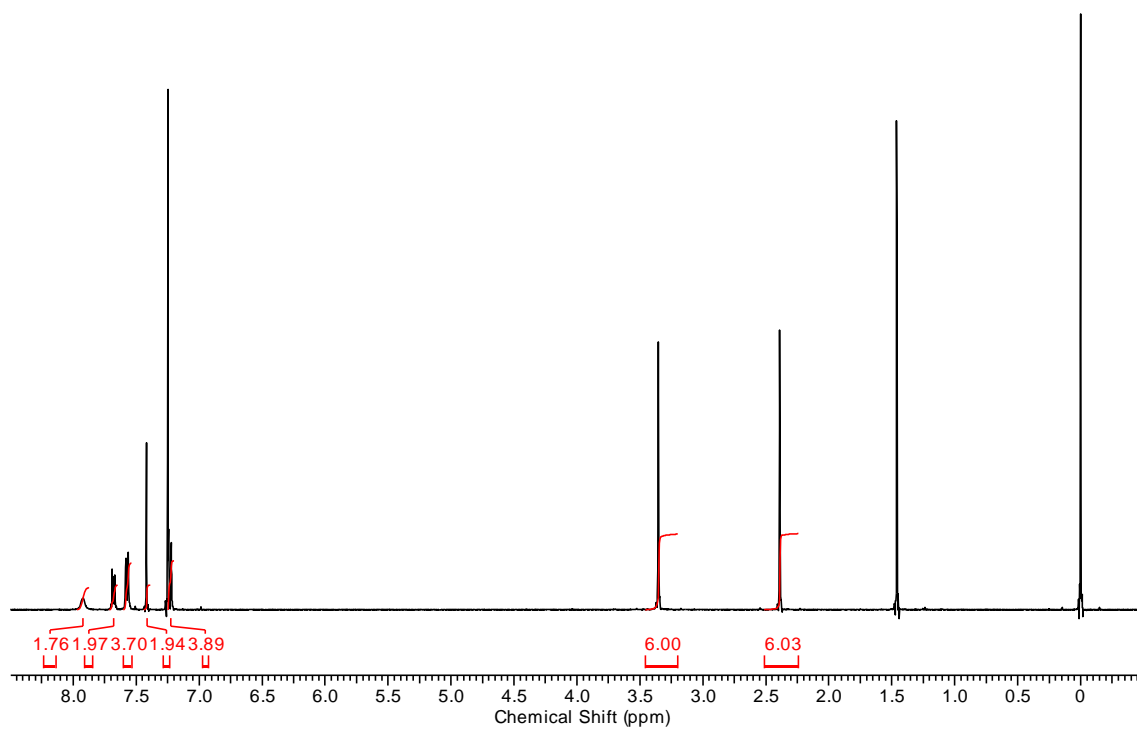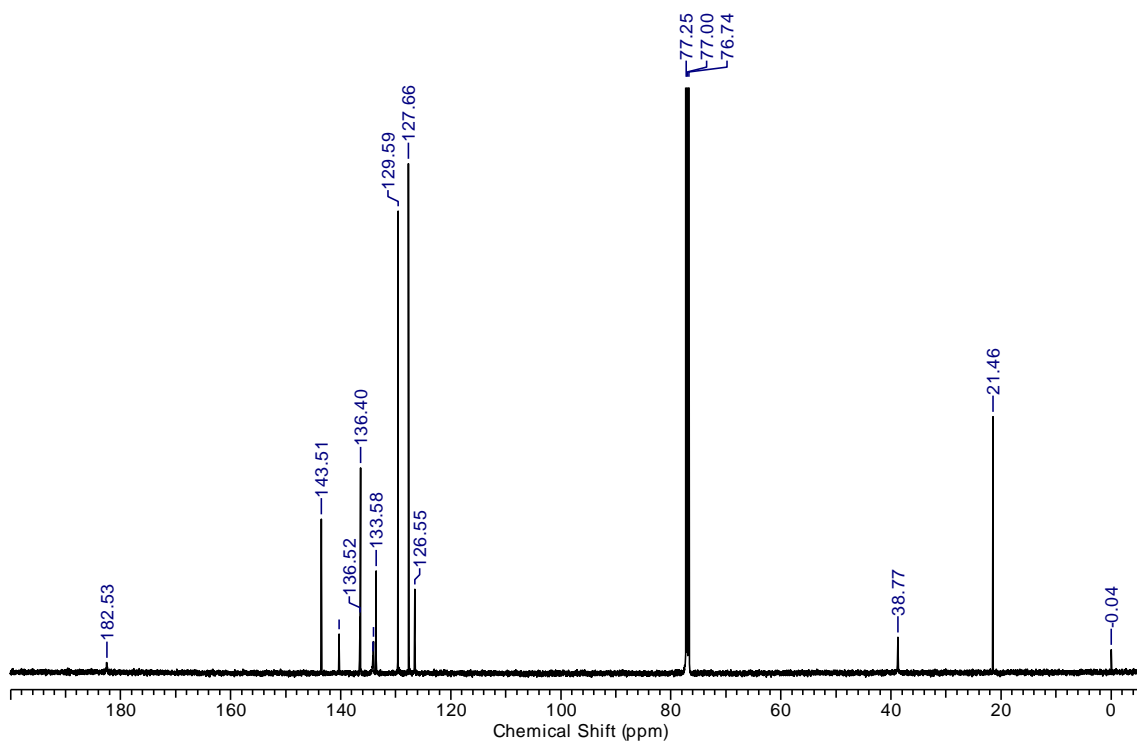

**Figure S13** <sup>1</sup>H (top) and <sup>13</sup>C (bottom) NMR spectra of **12** in CDCl<sub>3</sub> measured at 50 °C.

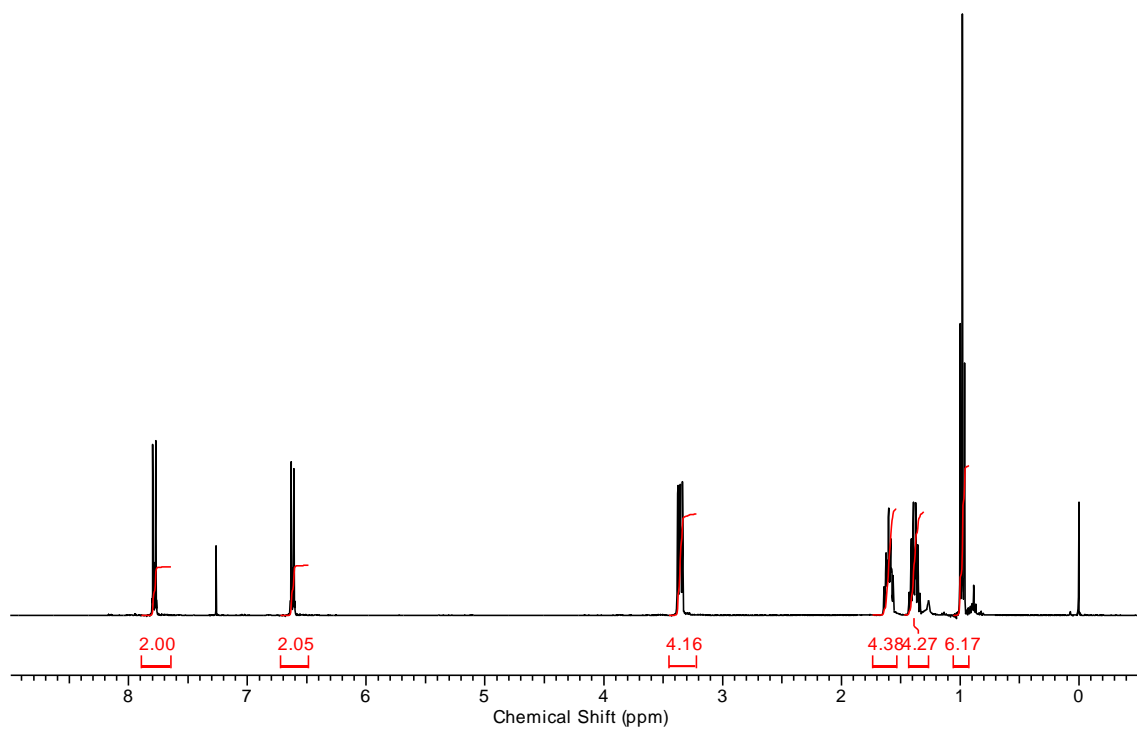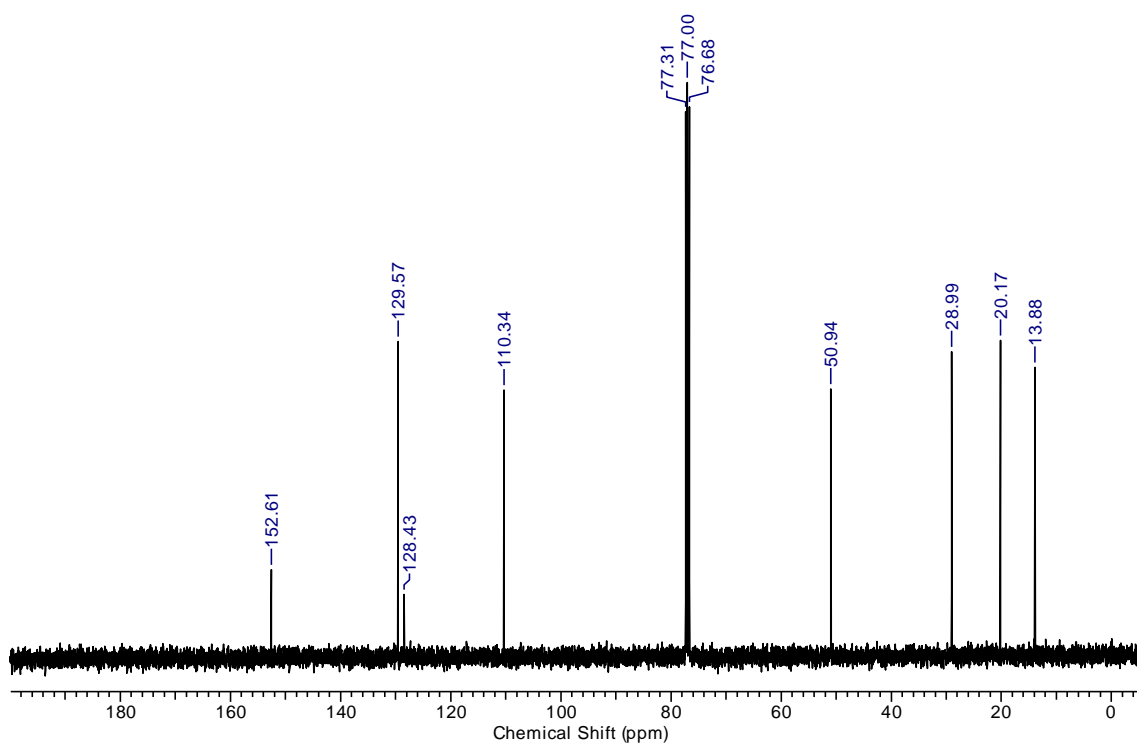

**Figure S14** <sup>1</sup>H (top) and <sup>13</sup>C (bottom) NMR spectra of 4-(dibutylamino)benzenesulfonyl chloride in CDCl<sub>3</sub>.

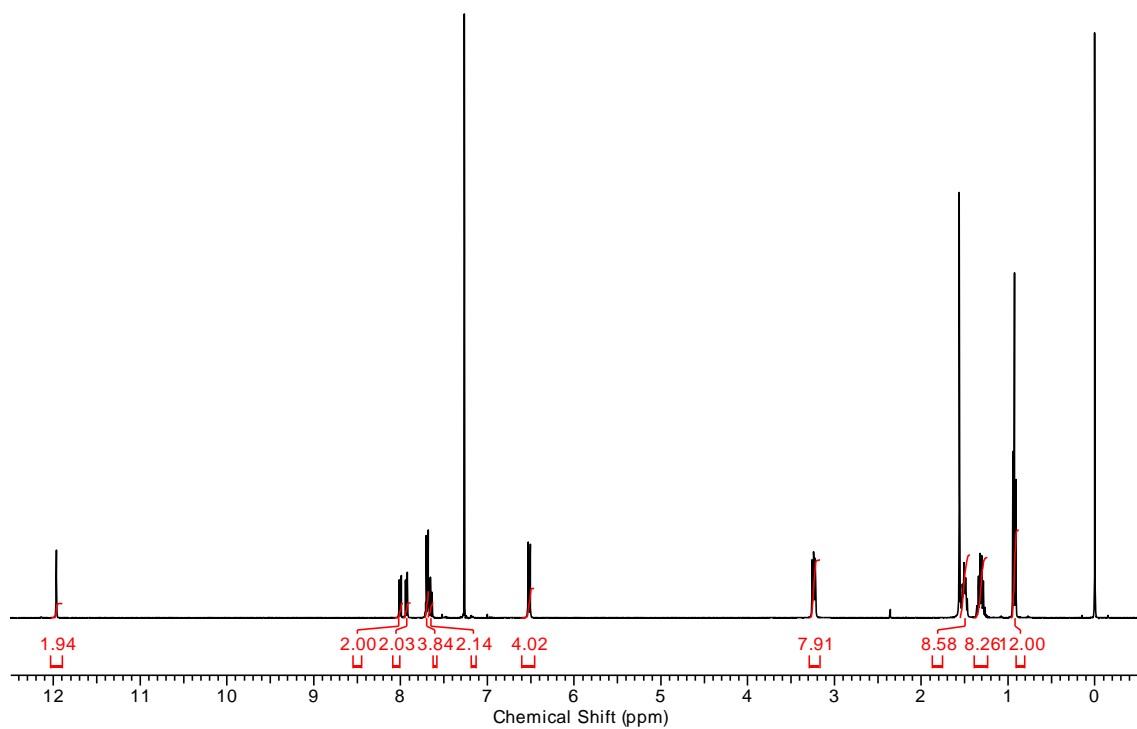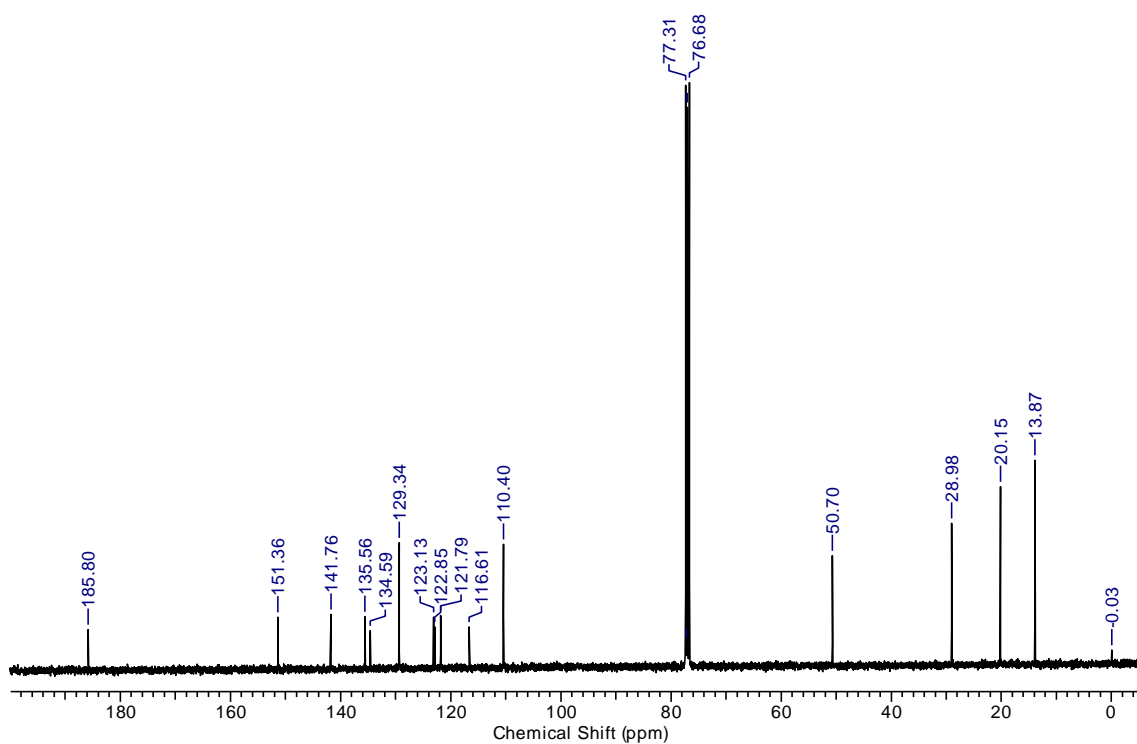

Figure S15 <sup>1</sup>H (top) and <sup>13</sup>C (bottom) NMR spectra of **15** in CDCl<sub>3</sub>.

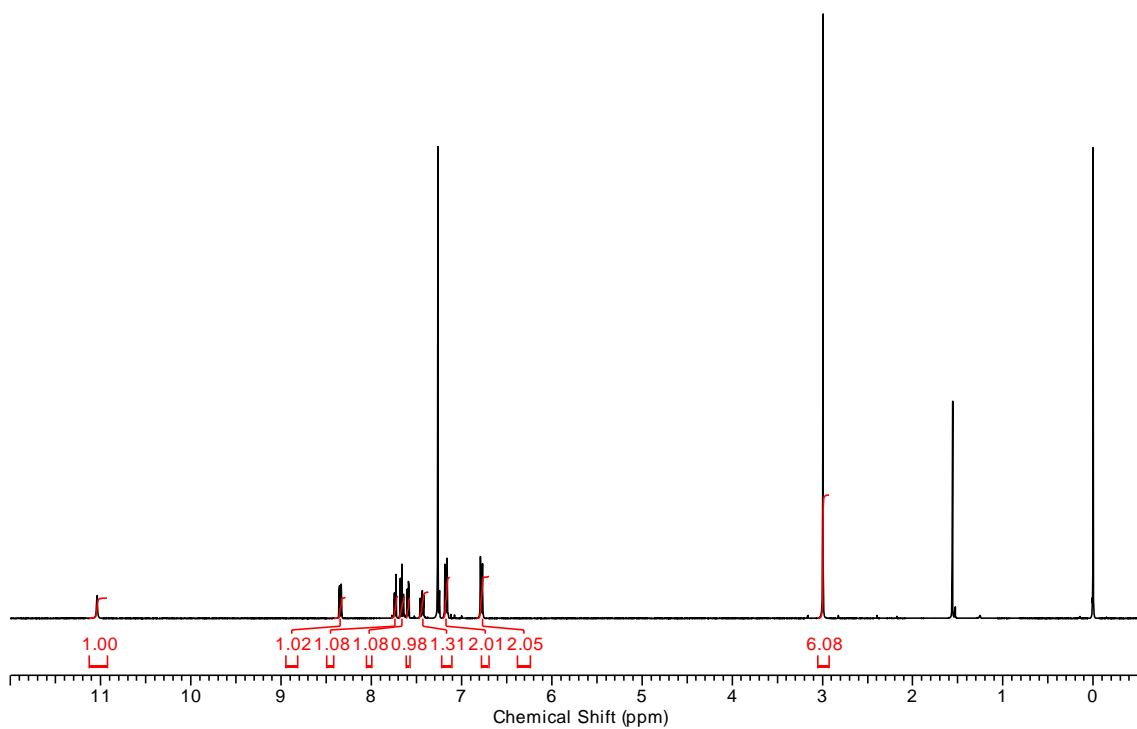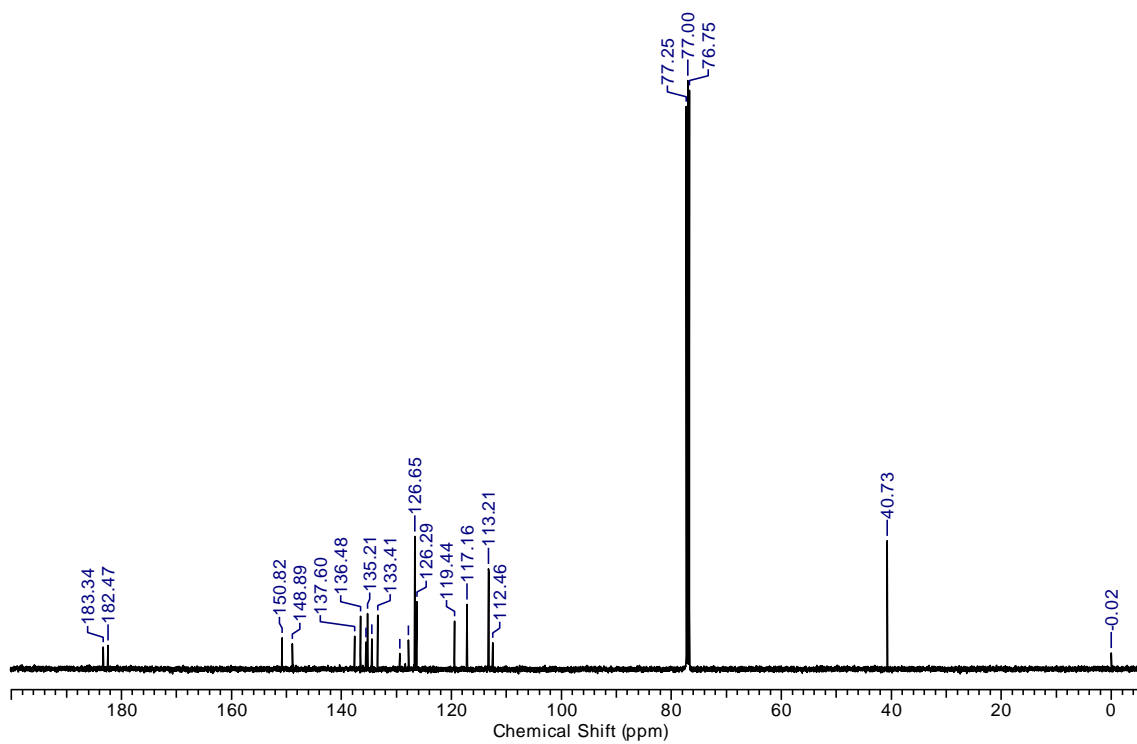

**Figure S16** <sup>1</sup>H (top) and <sup>13</sup>C (bottom) NMR spectra of **16** in CDCl<sub>3</sub>.

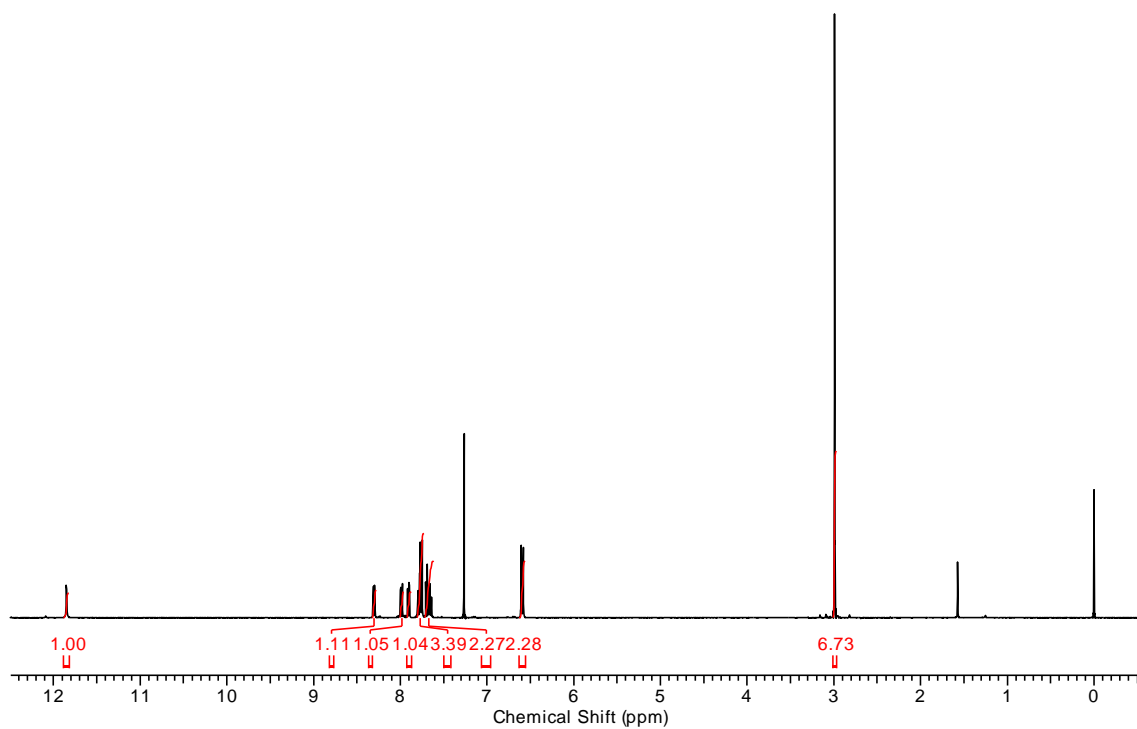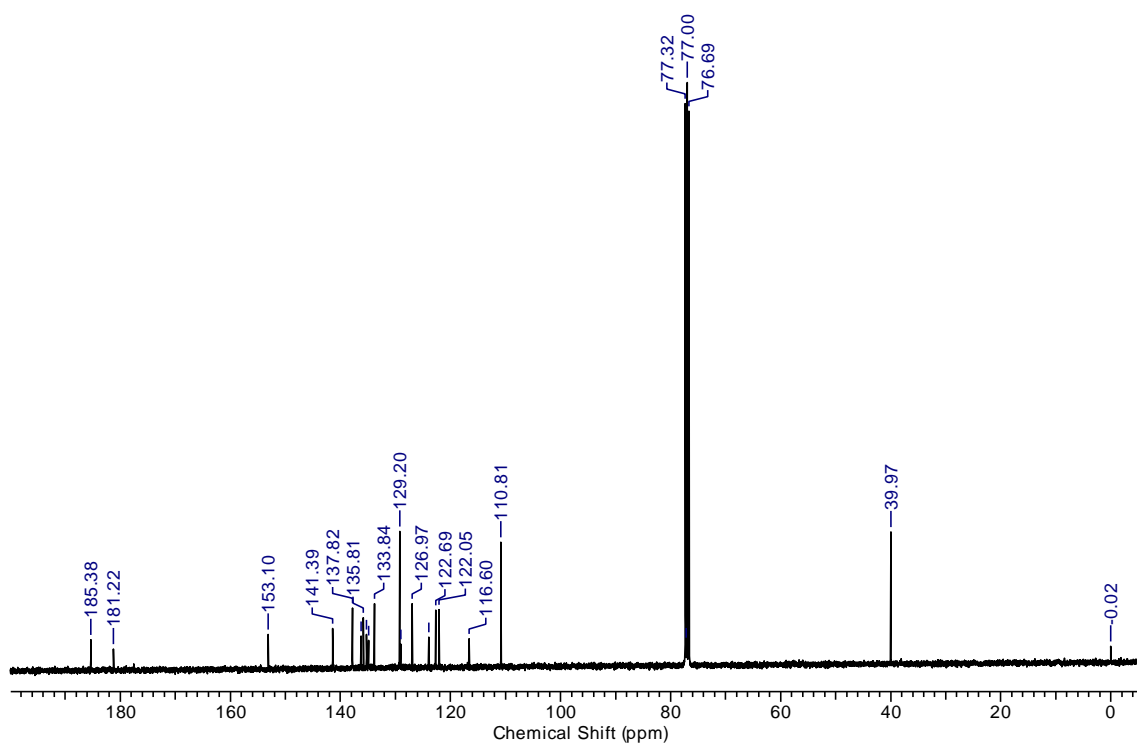

**Figure S17**  $^1\text{H}$  (top) and  $^{13}\text{C}$  (bottom) NMR spectra of **17** in  $\text{CDCl}_3$ .



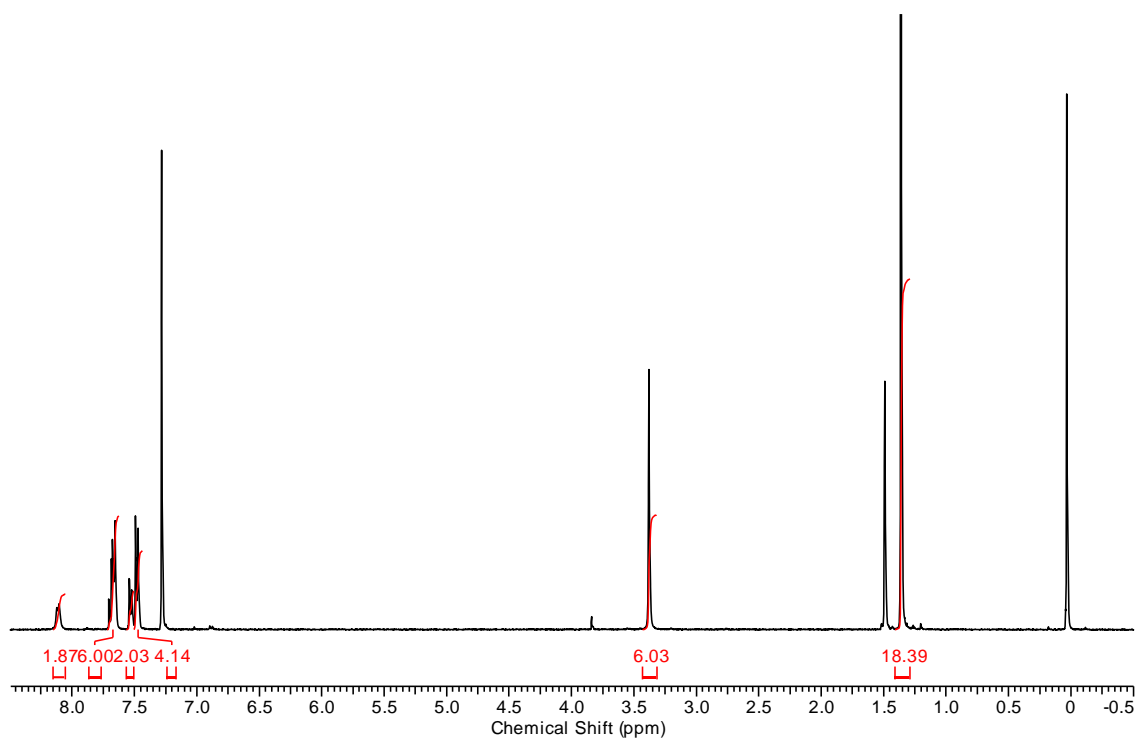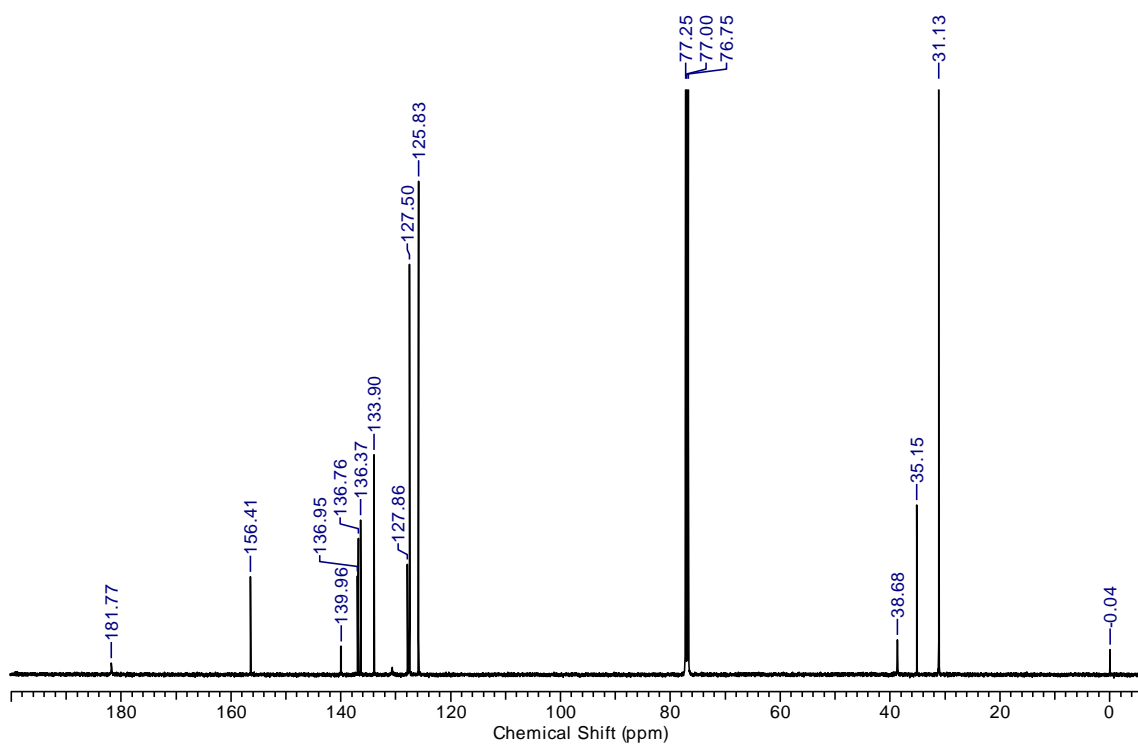

**Figure S18** <sup>1</sup>H (top) and <sup>13</sup>C (bottom) NMR spectra of **18** in CDCl<sub>3</sub> measured at 50 °C.

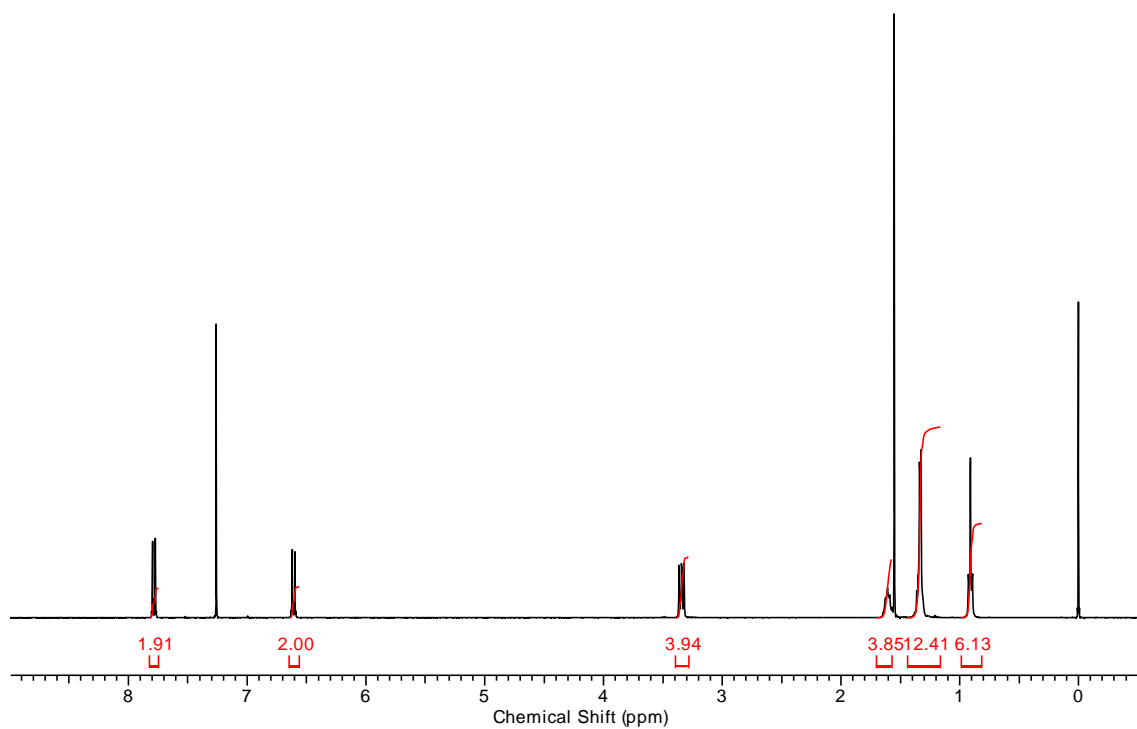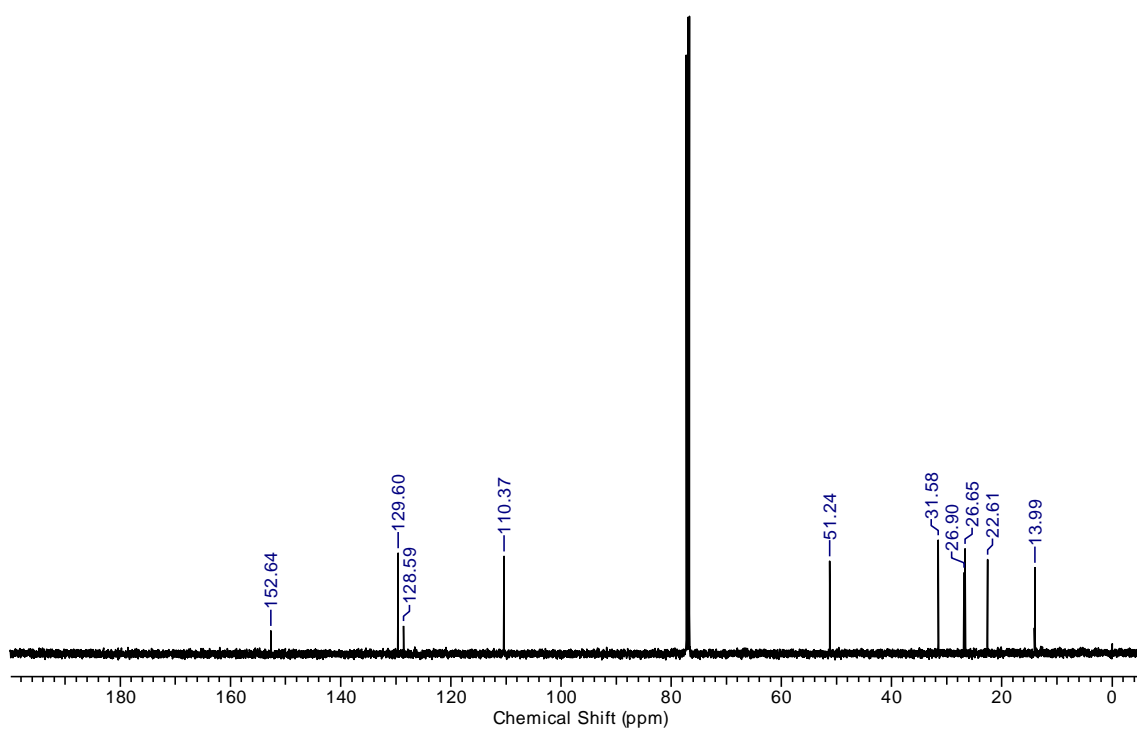

**Figure S19** <sup>1</sup>H (top) and <sup>13</sup>C (bottom) NMR spectra of 4-(dihexylamino)benzenesulfonyl chloride in CDCl<sub>3</sub>.

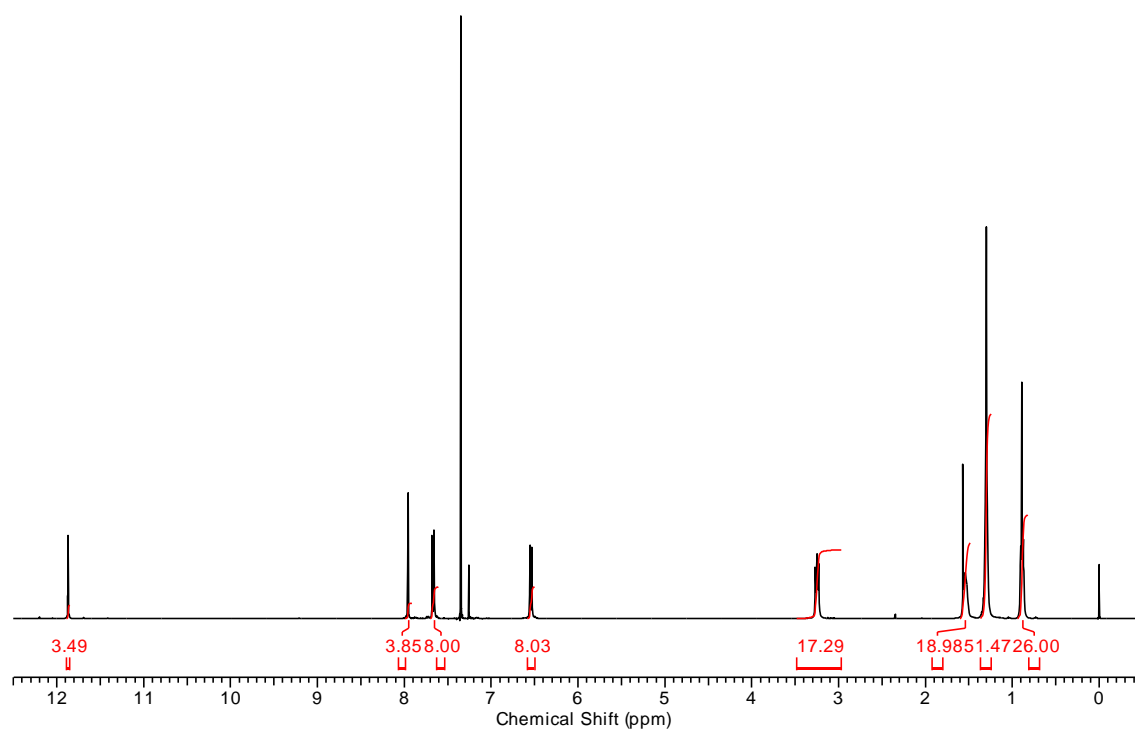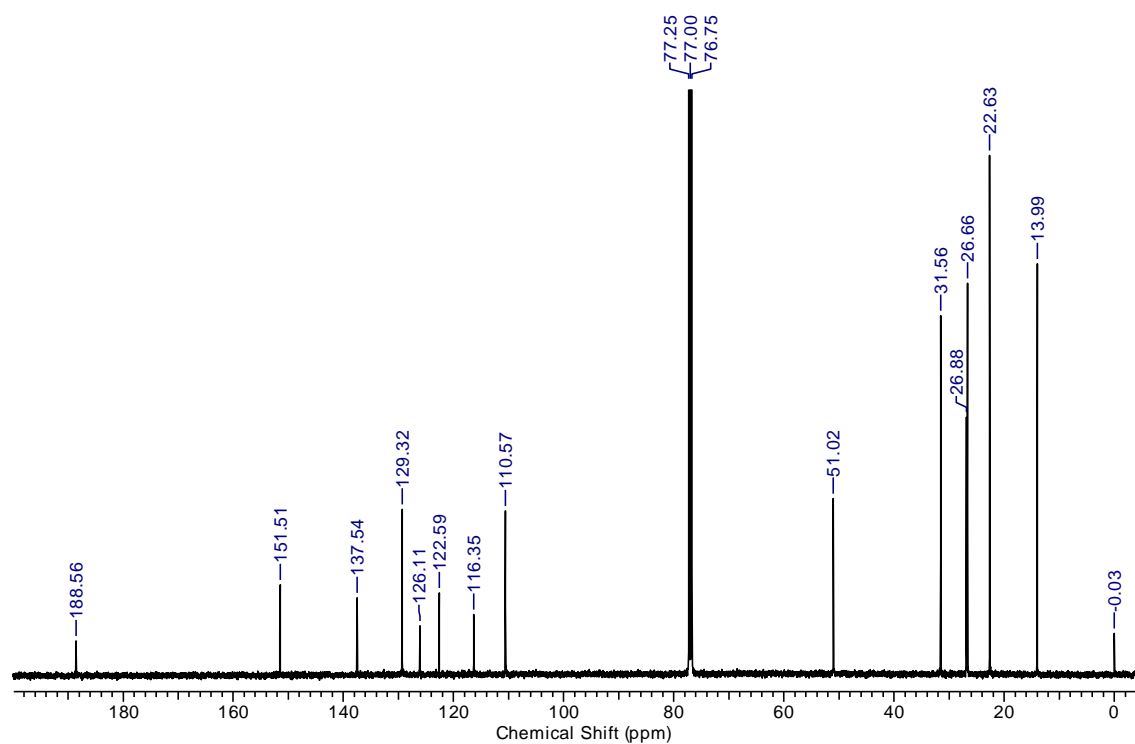

Figure S20 <sup>1</sup>H (top) and <sup>13</sup>C (bottom) NMR spectra of **21** in CDCl<sub>3</sub>.

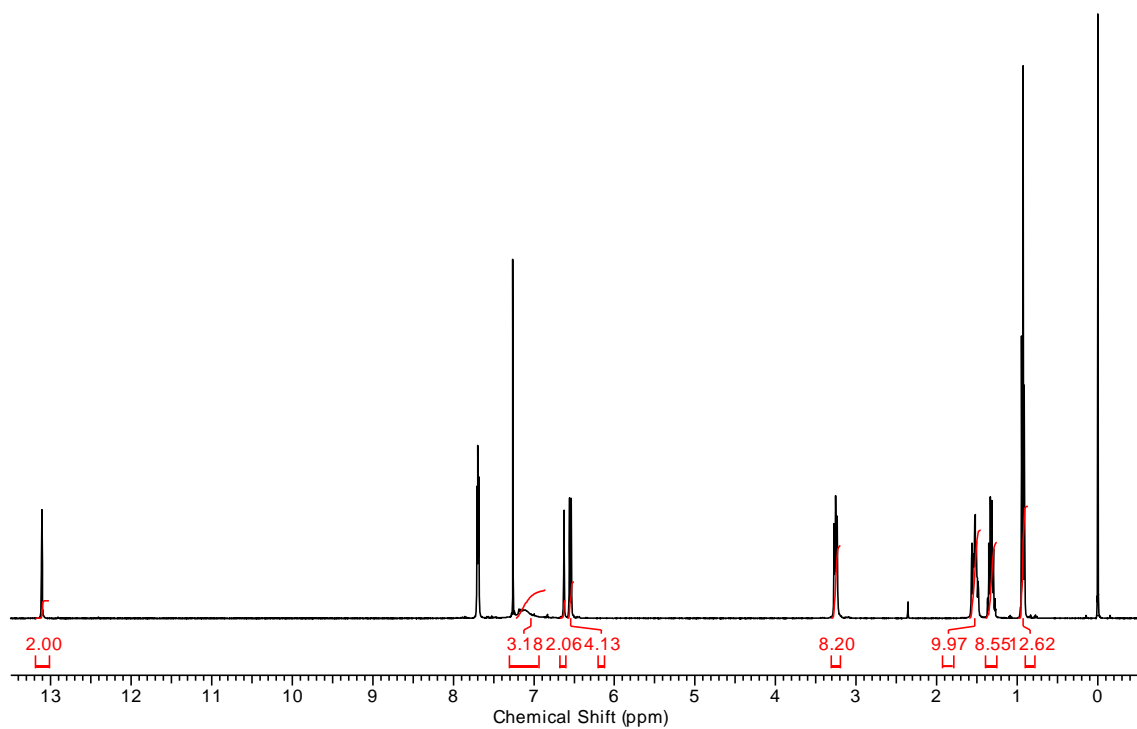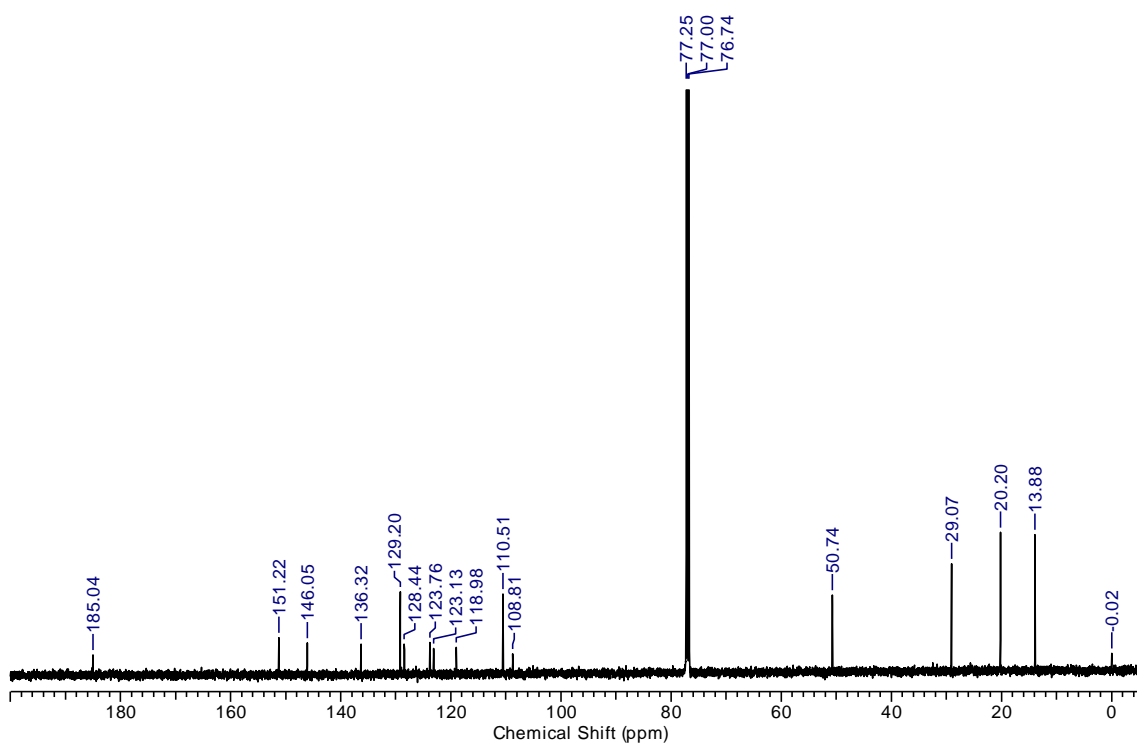

**Figure S21**  $^1\text{H}$  (top) and  $^{13}\text{C}$  (bottom) NMR spectra of **22** in  $\text{CDCl}_3$ .

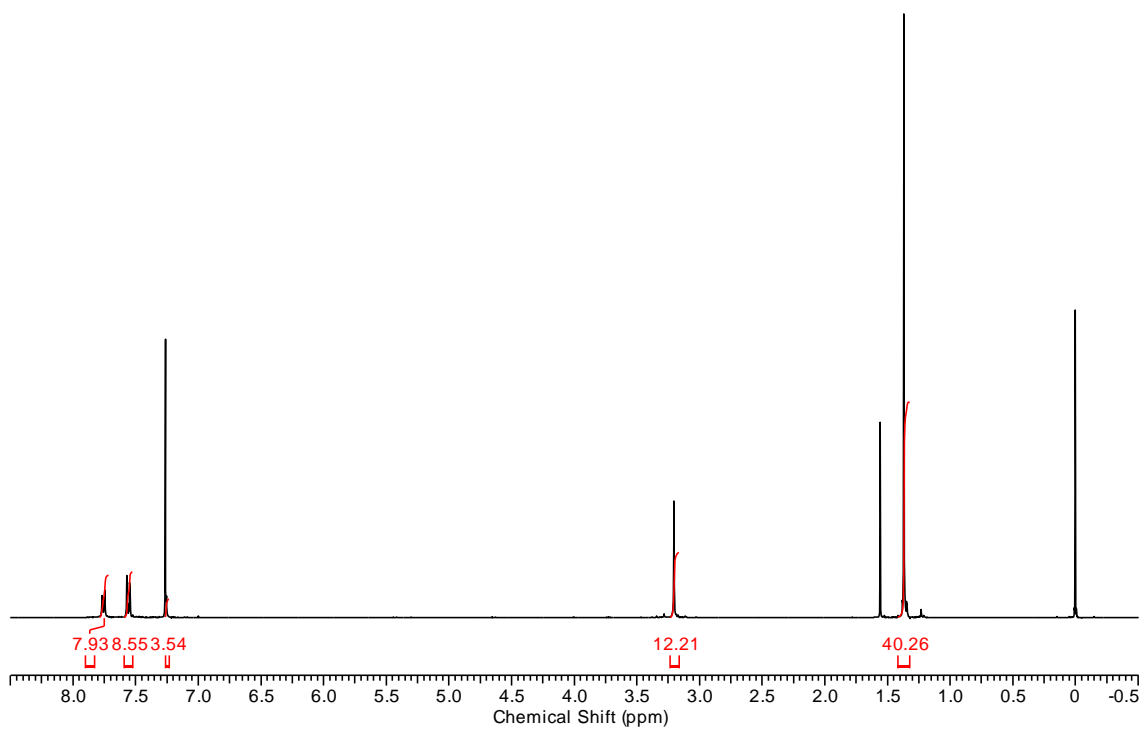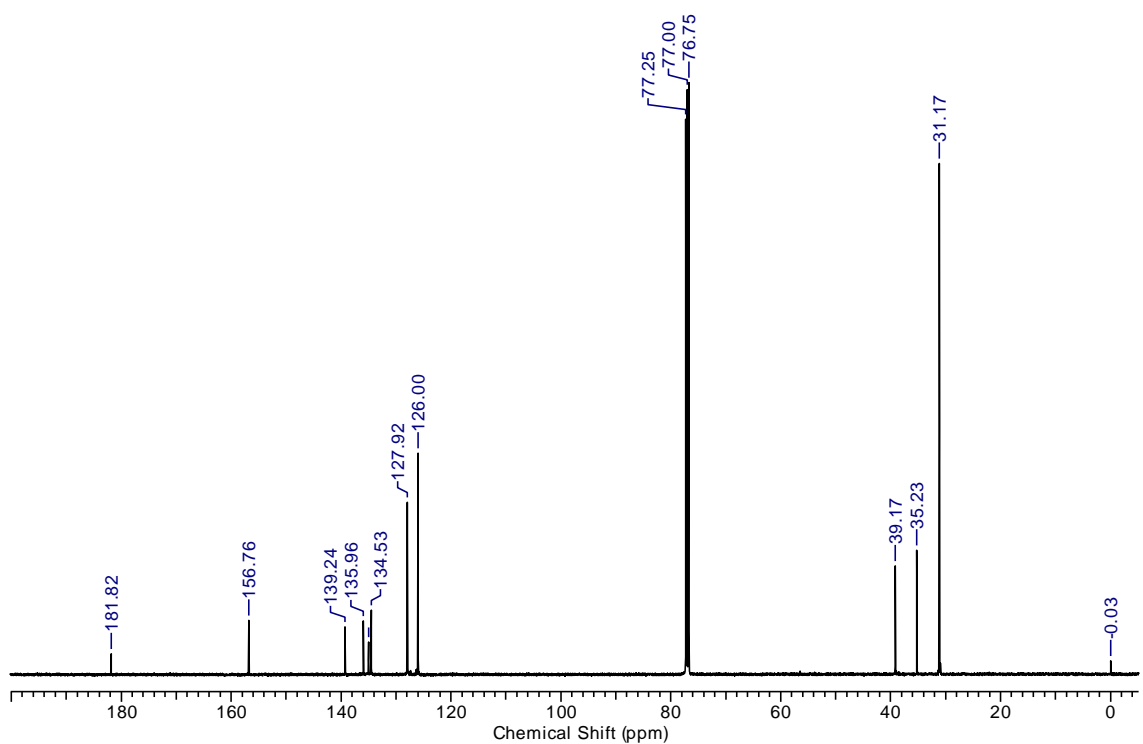

**Figure S22** <sup>1</sup>H (top) and <sup>13</sup>C (bottom) NMR spectra of **23** in CDCl<sub>3</sub> measured at 50 °C.

## 5. Cartesian coordinates of the optimized structures of 1-23

Cartesian coordinates of the optimized structure of **1**

E(RB3LYP) = -1340.23463628 a.u.

Number of imaginary frequencies: 0

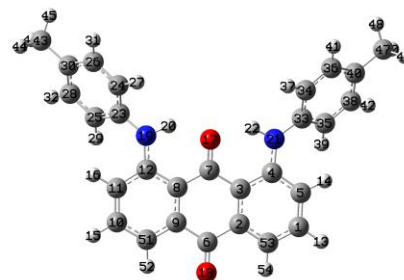

| Atom No. | Element | X         | Y         | Z         |
|----------|---------|-----------|-----------|-----------|
| 1        | C       | 3.681494  | 3.124835  | 0.017107  |
| 2        | C       | 1.277055  | 3.070207  | -0.012529 |
| 3        | C       | 1.276464  | 1.657479  | -0.144147 |
| 4        | C       | 2.539680  | 0.973540  | -0.166249 |
| 5        | C       | 3.724979  | 1.747621  | -0.101195 |
| 6        | C       | -0.000005 | 3.834437  | 0.041442  |
| 7        | C       | -0.000029 | 0.932349  | -0.275841 |
| 8        | C       | -1.276504 | 1.657503  | -0.144138 |
| 9        | C       | -1.277077 | 3.070228  | -0.012520 |
| 10       | C       | -3.681516 | 3.124875  | 0.017121  |
| 11       | C       | -3.725014 | 1.747662  | -0.101184 |
| 12       | C       | -2.539719 | 0.973572  | -0.166239 |
| 13       | H       | 4.612209  | 3.684853  | 0.053658  |
| 14       | H       | 4.680723  | 1.243036  | -0.174767 |
| 15       | H       | -4.612226 | 3.684902  | 0.053671  |
| 16       | H       | -4.680761 | 1.243086  | -0.174764 |
| 17       | O       | -0.000059 | -0.305441 | -0.507024 |
| 18       | O       | 0.000005  | 5.058233  | 0.142424  |
| 19       | N       | -2.597146 | -0.391992 | -0.289379 |
| 20       | H       | -1.693379 | -0.813064 | -0.500537 |
| 21       | N       | 2.597124  | -0.392024 | -0.289374 |
| 22       | H       | 1.693360  | -0.813115 | -0.500512 |
| 23       | C       | -3.696068 | -1.255375 | -0.108584 |
| 24       | C       | -3.790308 | -2.389263 | -0.930190 |
| 25       | C       | -4.650667 | -1.084065 | 0.906043  |
| 26       | C       | -4.815491 | -3.313063 | -0.749043 |
| 27       | H       | -3.052910 | -2.537754 | -1.714930 |

| Atom No. | Element | X         | Y         | Z         |
|----------|---------|-----------|-----------|-----------|
| 28       | C       | -5.681983 | -2.007991 | 1.062800  |
| 29       | H       | -4.568448 | -0.246400 | 1.590838  |
| 30       | C       | -5.791193 | -3.136913 | 0.241160  |
| 31       | H       | -4.861923 | -4.185148 | -1.397639 |
| 32       | H       | -6.407583 | -1.854848 | 1.858783  |
| 33       | C       | 3.696067  | -1.255379 | -0.108582 |
| 34       | C       | 3.790318  | -2.389285 | -0.930163 |
| 35       | C       | 4.650687  | -1.084017 | 0.906017  |
| 36       | C       | 4.815528  | -3.313055 | -0.749014 |
| 37       | H       | 3.052907  | -2.537813 | -1.714883 |
| 38       | C       | 5.682030  | -2.007912 | 1.062775  |
| 39       | H       | 4.568464  | -0.246332 | 1.590787  |
| 40       | C       | 5.791247  | -3.136855 | 0.241162  |
| 41       | H       | 4.861968  | -4.185155 | -1.397589 |
| 42       | H       | 6.407644  | -1.854729 | 1.858736  |
| 43       | C       | -6.927778 | -4.118449 | 0.404448  |
| 44       | H       | -7.780022 | -3.856470 | -0.237348 |
| 45       | H       | -6.621585 | -5.135194 | 0.135244  |
| 46       | H       | -7.294342 | -4.139071 | 1.436413  |
| 47       | C       | 6.927862  | -4.118356 | 0.404450  |
| 48       | H       | 6.621709  | -5.135104 | 0.135212  |
| 49       | H       | 7.780113  | -3.856332 | -0.237319 |
| 50       | H       | 7.294403  | -4.138994 | 1.436424  |
| 51       | C       | -2.457891 | 3.797465  | 0.074519  |
| 52       | H       | -2.398174 | 4.875031  | 0.172503  |
| 53       | C       | 2.457875  | 3.797433  | 0.074505  |
| 54       | H       | 2.398168  | 4.875000  | 0.172489  |

Cartesian coordinates of the optimized structure of 2

E(RB3LYP) = -1529.53098551 a.u.

Number of imaginary frequencies: 0

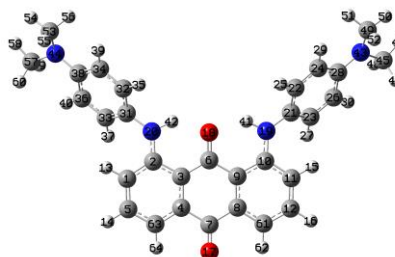

| Atom No. | Element | X         | Y         | Z         |
|----------|---------|-----------|-----------|-----------|
| 1        | C       | -3.725570 | 2.274453  | -0.115500 |
| 2        | C       | -2.539179 | 1.498872  | -0.171183 |
| 3        | C       | -1.275318 | 2.184173  | -0.152980 |
| 4        | C       | -1.276942 | 3.598982  | -0.041942 |
| 5        | C       | -3.681916 | 3.652591  | -0.017342 |
| 6        | C       | -0.000001 | 1.456208  | -0.263592 |
| 7        | C       | 0.000029  | 4.363924  | 0.003039  |
| 8        | C       | 1.276985  | 3.598960  | -0.041979 |
| 9        | C       | 1.275325  | 2.184151  | -0.152983 |
| 10       | C       | 2.539165  | 1.498822  | -0.171197 |
| 11       | C       | 3.725579  | 2.274368  | -0.115580 |
| 12       | C       | 3.681964  | 3.652510  | -0.017463 |
| 13       | H       | -4.680538 | 1.765879  | -0.175343 |
| 14       | H       | -4.612755 | 4.213191  | 0.012556  |
| 15       | H       | 4.680529  | 1.765757  | -0.175434 |
| 16       | H       | 4.612818  | 4.213088  | 0.012386  |
| 17       | O       | 0.000042  | 5.589643  | 0.086895  |
| 18       | O       | 0.000006  | 0.210516  | -0.456749 |
| 19       | N       | 2.599636  | 0.134858  | -0.270248 |
| 20       | N       | -2.599684 | 0.134913  | -0.270312 |
| 21       | C       | 3.727491  | -0.706920 | -0.127061 |
| 22       | C       | 3.906627  | -1.762808 | -1.029585 |
| 23       | C       | 4.642169  | -0.588880 | 0.928090  |
| 24       | C       | 4.954161  | -2.666289 | -0.891584 |
| 25       | H       | 3.214171  | -1.871729 | -1.860438 |
| 26       | C       | 5.706927  | -1.474185 | 1.061163  |
| 27       | H       | 4.514520  | 0.198510  | 1.664836  |
| 28       | C       | 5.887855  | -2.549668 | 0.162499  |
| 29       | H       | 5.045141  | -3.461461 | -1.621723 |
| 30       | H       | 6.389568  | -1.331696 | 1.890362  |
| 31       | C       | -3.727528 | -0.706878 | -0.127085 |
| 32       | C       | -3.906711 | -1.762719 | -1.029654 |

| Atom No. | Element | X         | Y         | Z         |
|----------|---------|-----------|-----------|-----------|
| 33       | C       | -4.642148 | -0.588906 | 0.928127  |
| 34       | C       | -4.954232 | -2.666213 | -0.891643 |
| 35       | H       | -3.214303 | -1.871588 | -1.860553 |
| 36       | C       | -5.706892 | -1.474227 | 1.061213  |
| 37       | H       | -4.514460 | 0.198440  | 1.664913  |
| 38       | C       | -5.887865 | -2.549660 | 0.162499  |
| 39       | H       | -5.045252 | -3.461343 | -1.621823 |
| 40       | H       | -6.389485 | -1.331788 | 1.890458  |
| 41       | H       | 1.692198  | -0.297606 | -0.437653 |
| 42       | H       | -1.692250 | -0.297549 | -0.437746 |
| 43       | N       | 6.927583  | -3.462766 | 0.318420  |
| 44       | N       | -6.927572 | -3.462788 | 0.318423  |
| 45       | C       | 7.988718  | -3.170819 | 1.266320  |
| 46       | H       | 8.705872  | -3.994224 | 1.263392  |
| 47       | H       | 8.531171  | -2.239513 | 1.033437  |
| 48       | H       | 7.592339  | -3.084966 | 2.285055  |
| 49       | C       | 7.212575  | -4.397239 | -0.756435 |
| 50       | H       | 8.043533  | -5.040253 | -0.459253 |
| 51       | H       | 6.350001  | -5.045549 | -0.951634 |
| 52       | H       | 7.482908  | -3.898390 | -1.701820 |
| 53       | C       | -7.212635 | -4.397151 | -0.756510 |
| 54       | H       | -8.043521 | -5.040247 | -0.459307 |
| 55       | H       | -7.483102 | -3.898208 | -1.701809 |
| 56       | H       | -6.350045 | -5.045387 | -0.951877 |
| 57       | C       | -7.988695 | -3.170887 | 1.266353  |
| 58       | H       | -8.705825 | -3.994314 | 1.263424  |
| 59       | H       | -7.592297 | -3.085049 | 2.285080  |
| 60       | H       | -8.531181 | -2.239591 | 1.033504  |
| 61       | C       | 2.458156  | 4.327086  | 0.030656  |
| 62       | H       | 2.399116  | 5.406016  | 0.112643  |
| 63       | C       | -2.458091 | 4.327135  | 0.030749  |
| 64       | H       | -2.399022 | 5.406062  | 0.112757  |

Cartesian coordinates of the optimized structure of **3**

E(RB3LYP) = -2437.3643418 a.u.

Number of imaginary frequencies: 0

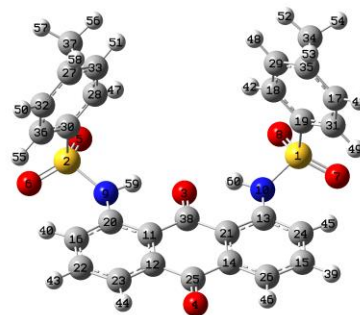

| Atom No. | Element | X         | Y         | Z         |
|----------|---------|-----------|-----------|-----------|
| 1        | S       | -3.839801 | 0.310018  | 1.870099  |
| 2        | S       | 3.837615  | 0.307612  | 1.871983  |
| 3        | O       | -0.001526 | -0.833445 | 1.429284  |
| 4        | O       | -0.001592 | -4.337014 | -2.682050 |
| 5        | O       | 3.321446  | 0.976680  | 3.063222  |
| 6        | O       | 5.117131  | -0.402755 | 1.869337  |
| 7        | O       | -5.120281 | -0.398592 | 1.864859  |
| 8        | O       | -3.324647 | 0.977597  | 3.062605  |
| 9        | N       | 2.601858  | -0.791265 | 1.485923  |
| 10       | N       | -2.604994 | -0.790422 | 1.485313  |
| 11       | C       | 1.280381  | -2.123234 | -0.090179 |
| 12       | C       | 1.275728  | -3.052989 | -1.159899 |
| 13       | C       | -2.546403 | -1.685918 | 0.418660  |
| 14       | C       | -1.278871 | -3.052555 | -1.160228 |
| 15       | C       | -3.683323 | -3.105313 | -1.197599 |
| 16       | C       | 3.727395  | -2.206701 | -0.142874 |
| 17       | C       | -4.809566 | 2.300417  | -1.534825 |
| 18       | C       | -2.928545 | 2.531609  | 0.515469  |
| 19       | C       | -3.867160 | 1.495719  | 0.525866  |
| 20       | C       | 2.543284  | -1.686825 | 0.419380  |
| 21       | C       | -1.283509 | -2.122770 | -0.090534 |
| 22       | C       | 3.680170  | -3.106533 | -1.196619 |
| 23       | C       | 2.457569  | -3.533148 | -1.713741 |
| 24       | C       | -3.730532 | -2.205447 | -0.143877 |
| 25       | C       | -0.001578 | -3.547881 | -1.742934 |
| 26       | C       | -2.460724 | -3.532330 | -1.714385 |
| 27       | C       | 3.885880  | 3.340762  | -1.574594 |
| 28       | C       | 2.929453  | 2.527567  | 0.512489  |
| 29       | C       | -2.941120 | 3.445290  | -0.533601 |
| 30       | C       | 3.868752  | 1.492246  | 0.526894  |

| Atom No. | Element | X         | Y         | Z         |
|----------|---------|-----------|-----------|-----------|
| 31       | C       | -4.814415 | 1.375439  | -0.491127 |
| 32       | C       | 4.817893  | 2.296301  | -1.530950 |
| 33       | C       | 2.945095  | 3.440484  | -0.537095 |
| 34       | C       | -3.899271 | 4.362921  | -2.689883 |
| 35       | C       | -3.878128 | 3.345670  | -1.574403 |
| 36       | C       | 4.819648  | 1.371946  | -0.486580 |
| 37       | C       | 3.909391  | 4.357023  | -2.690930 |
| 38       | C       | -0.001545 | -1.641925 | 0.473249  |
| 39       | H       | -4.612420 | -3.490100 | -1.608775 |
| 40       | H       | 4.677699  | -1.912551 | 0.283604  |
| 41       | H       | -5.547730 | 2.210942  | -2.327792 |
| 42       | H       | -2.214455 | 2.625783  | 1.327177  |
| 43       | H       | 4.609251  | -3.491595 | -1.607572 |
| 44       | H       | 2.395107  | -4.241303 | -2.531828 |
| 45       | H       | -4.680834 | -1.910934 | 0.282353  |
| 46       | H       | -2.398269 | -4.240525 | -2.532438 |
| 47       | H       | 2.212472  | 2.621880  | 1.321634  |
| 48       | H       | -2.216200 | 4.255648  | -0.542643 |
| 49       | H       | -5.553628 | 0.583300  | -0.452933 |
| 50       | H       | 5.558986  | 2.206859  | -2.321169 |
| 51       | H       | 2.219675  | 4.250366  | -0.549231 |
| 52       | H       | -2.885766 | 4.658403  | -2.981878 |
| 53       | H       | -4.410317 | 3.975746  | -3.576710 |
| 54       | H       | -4.425571 | 5.274873  | -2.378853 |
| 55       | H       | 5.559266  | 0.580345  | -0.445189 |
| 56       | H       | 2.896182  | 4.637342  | -2.998733 |
| 57       | H       | 4.417297  | 5.276987  | -2.373086 |
| 58       | H       | 4.439303  | 3.976304  | -3.569388 |
| 59       | H       | 1.687569  | -0.498554 | 1.841461  |
| 60       | H       | -1.690623 | -0.498206 | 1.841068  |



Cartesian coordinates of the optimized structure of 4

E(RB3LYP) = -2626.66922860 a.u.

Number of imaginary frequencies: 0

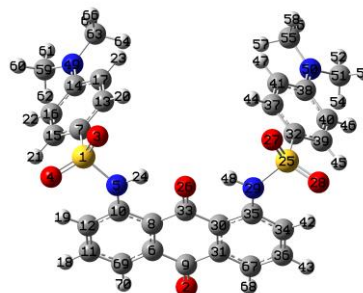

| Atom No. | Element | X         | Y         | Z         |
|----------|---------|-----------|-----------|-----------|
| 1        | S       | 3.886687  | -0.776591 | -2.076156 |
| 2        | O       | 0.000016  | -3.885639 | 3.623223  |
| 3        | O       | 3.335019  | -0.406051 | -3.378080 |
| 4        | O       | 5.108874  | -1.573824 | -1.948091 |
| 5        | N       | 2.603321  | -1.643131 | -1.366534 |
| 6        | C       | 1.276961  | -3.096708 | 1.794119  |
| 7        | C       | 4.092689  | 0.697500  | -1.102422 |
| 8        | C       | 1.281296  | -2.489860 | 0.513035  |
| 9        | C       | -0.000020 | -3.399486 | 2.496409  |
| 10       | C       | 2.544028  | -2.224633 | -0.105276 |
| 11       | C       | 3.680131  | -3.178227 | 1.824962  |
| 12       | C       | 3.727359  | -2.596635 | 0.567932  |
| 13       | C       | 3.234900  | 1.784509  | -1.303673 |
| 14       | C       | 4.399119  | 3.045065  | 0.434371  |
| 15       | C       | 5.110934  | 0.782884  | -0.149132 |
| 16       | C       | 5.264330  | 1.936017  | 0.607543  |
| 17       | C       | 3.384248  | 2.939306  | -0.551983 |
| 18       | H       | 4.608815  | -3.454682 | 2.316631  |
| 19       | H       | 4.676639  | -2.448760 | 0.069743  |
| 20       | H       | 2.464597  | 1.731284  | -2.066527 |
| 21       | H       | 5.799261  | -0.044989 | -0.020888 |
| 22       | H       | 6.070741  | 1.978189  | 1.328931  |
| 23       | H       | 2.714880  | 3.769588  | -0.739953 |
| 24       | H       | 1.693846  | -1.417670 | -1.777146 |
| 25       | S       | -3.886972 | -0.776572 | -2.075912 |
| 26       | O       | -0.000141 | -1.612368 | -1.276466 |
| 27       | O       | -3.335448 | -0.406156 | -3.377931 |
| 28       | O       | -5.109230 | -1.573661 | -1.947632 |
| 29       | N       | -2.603611 | -1.643219 | -1.366411 |
| 30       | C       | -1.281468 | -2.489895 | 0.513102  |
| 31       | C       | -1.277046 | -3.096739 | 1.794187  |
| 32       | C       | -4.092681 | 0.697609  | -1.102243 |
| 33       | C       | -0.000106 | -2.160486 | -0.150756 |
| 34       | C       | -3.727525 | -2.596727 | 0.568137  |
| 35       | C       | -2.544241 | -2.224701 | -0.105139 |

| Atom No. | Element | X         | Y         | Z         |
|----------|---------|-----------|-----------|-----------|
| 36       | C       | -3.680212 | -3.178312 | 1.825168  |
| 37       | C       | -3.234985 | 1.784616  | -1.303877 |
| 38       | C       | -4.398586 | 3.045279  | 0.434511  |
| 39       | C       | -5.110634 | 0.783077  | -0.148649 |
| 40       | C       | -5.263788 | 1.936273  | 0.607979  |
| 41       | C       | -3.384102 | 2.939476  | -0.552233 |
| 42       | H       | -4.676835 | -2.448867 | 0.070002  |
| 43       | H       | -4.608863 | -3.454784 | 2.316892  |
| 44       | H       | -2.464970 | 1.731355  | -2.067019 |
| 45       | H       | -5.798950 | -0.044766 | -0.020150 |
| 46       | H       | -6.070023 | 1.978517  | 1.329561  |
| 47       | H       | -2.714861 | 3.769775  | -0.740579 |
| 48       | H       | -1.694147 | -1.417716 | -1.777031 |
| 49       | N       | 4.542307  | 4.187068  | 1.191381  |
| 50       | N       | -4.541401 | 4.187278  | 1.191643  |
| 51       | C       | -5.638296 | 4.298907  | 2.140249  |
| 52       | H       | -5.568141 | 5.257058  | 2.657120  |
| 53       | H       | -6.620629 | 4.246922  | 1.648438  |
| 54       | H       | -5.593667 | 3.505493  | 2.897327  |
| 55       | C       | -3.705330 | 5.346975  | 0.926729  |
| 56       | H       | -3.963200 | 6.141361  | 1.628608  |
| 57       | H       | -2.641122 | 5.113235  | 1.061560  |
| 58       | H       | -3.843252 | 5.734637  | -0.093123 |
| 59       | C       | 5.638773  | 4.298186  | 2.140533  |
| 60       | H       | 6.621264  | 4.245398  | 1.649155  |
| 61       | H       | 5.569077  | 5.256560  | 2.657048  |
| 62       | H       | 5.593308  | 3.505012  | 2.897839  |
| 63       | C       | 3.705382  | 5.346403  | 0.927625  |
| 64       | H       | 2.641415  | 5.112337  | 1.063945  |
| 65       | H       | 3.964009  | 6.140973  | 1.629011  |
| 66       | H       | 3.841767  | 5.733989  | -0.092447 |
| 67       | C       | -2.458216 | -3.427444 | 2.449232  |
| 68       | H       | -2.395548 | -3.886179 | 3.429155  |
| 69       | C       | 2.458175  | -3.427388 | 2.449095  |
| 70       | H       | 2.395574  | -3.886126 | 3.429021  |

Cartesian coordinates of the optimized structure of **5**

E(RB3LYP) = -1568.73935086 a.u.

Number of imaginary frequencies: 0

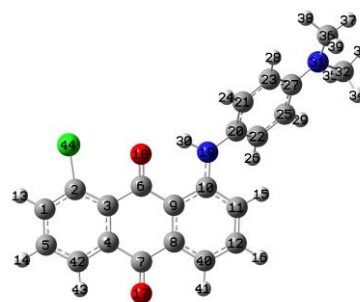

| Atom No. | Element | X         | Y         | Z         |
|----------|---------|-----------|-----------|-----------|
| 1        | C       | -5.412610 | -1.845713 | 0.292349  |
| 2        | C       | -4.020965 | -1.813271 | 0.163601  |
| 3        | C       | -3.331435 | -0.587600 | 0.026722  |
| 4        | C       | -4.113695 | 0.592075  | 0.037047  |
| 5        | C       | -6.155230 | -0.668502 | 0.286138  |
| 6        | C       | -1.842633 | -0.489375 | -0.147322 |
| 7        | C       | -3.482767 | 1.940253  | -0.073119 |
| 8        | C       | -2.001383 | 2.017858  | -0.151494 |
| 9        | C       | -1.210524 | 0.839183  | -0.170594 |
| 10       | C       | 0.219916  | 0.975273  | -0.232935 |
| 11       | C       | 0.767291  | 2.283793  | -0.303833 |
| 12       | C       | -0.040508 | 3.404148  | -0.291340 |
| 13       | H       | -5.902249 | -2.807707 | 0.398250  |
| 14       | H       | -7.236167 | -0.711689 | 0.383615  |
| 15       | H       | 1.841704  | 2.391670  | -0.393305 |
| 16       | H       | 0.415010  | 4.388592  | -0.359713 |
| 17       | O       | -4.178269 | 2.951770  | -0.082652 |
| 18       | O       | -1.172925 | -1.524836 | -0.273809 |
| 19       | N       | 1.030908  | -0.123614 | -0.251667 |
| 20       | C       | 2.441341  | -0.169373 | -0.129850 |
| 21       | C       | 3.173778  | -1.000914 | -0.985746 |
| 22       | C       | 3.141124  | 0.525849  | 0.865025  |

| Atom No. | Element | X         | Y         | Z         |
|----------|---------|-----------|-----------|-----------|
| 23       | C       | 4.552239  | -1.131664 | -0.863134 |
| 24       | H       | 2.652747  | -1.548361 | -1.766948 |
| 25       | C       | 4.522717  | 0.418760  | 0.981668  |
| 26       | H       | 2.598234  | 1.151438  | 1.567277  |
| 27       | C       | 5.270400  | -0.423173 | 0.127041  |
| 28       | H       | 5.069715  | -1.785308 | -1.554843 |
| 29       | H       | 5.015750  | 0.984699  | 1.762899  |
| 30       | H       | 0.521586  | -1.003353 | -0.332267 |
| 31       | N       | 6.647504  | -0.559987 | 0.263854  |
| 32       | C       | 7.366658  | 0.349421  | 1.138963  |
| 33       | H       | 8.426954  | 0.089274  | 1.130485  |
| 34       | H       | 7.267884  | 1.404920  | 0.836553  |
| 35       | H       | 7.015091  | 0.259630  | 2.173733  |
| 36       | C       | 7.396577  | -1.252307 | -0.770742 |
| 37       | H       | 8.452825  | -1.270407 | -0.495042 |
| 38       | H       | 7.064593  | -2.293041 | -0.867010 |
| 39       | H       | 7.306027  | -0.773940 | -1.759651 |
| 40       | C       | -1.432105 | 3.283510  | -0.205662 |
| 41       | H       | -2.083382 | 4.149431  | -0.191102 |
| 42       | C       | -5.503841 | 0.551980  | 0.160613  |
| 43       | H       | -6.042715 | 1.492746  | 0.157424  |
| 44       | Cl      | -3.244060 | -3.385302 | 0.209156  |

Cartesian coordinates of the optimized structure of **6**

E(RB3LYP) = -2515.94134656 a.u.

Number of imaginary frequencies: 0

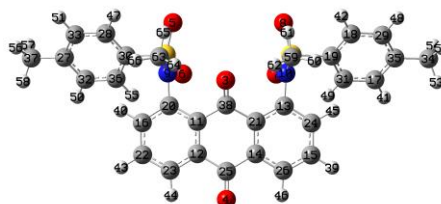

| Atom No. | Element | X         | Y         | Z         |
|----------|---------|-----------|-----------|-----------|
| 1        | S       | -2.751827 | -1.418072 | 0.079166  |
| 2        | S       | 2.751590  | -1.418108 | 0.079991  |
| 3        | O       | 0.000117  | 0.567903  | 1.972344  |
| 4        | O       | 0.000441  | 5.051277  | -0.773200 |
| 5        | O       | 2.417336  | -2.615363 | 0.851430  |
| 6        | O       | 2.046088  | -1.028263 | -1.139489 |
| 7        | O       | -2.046805 | -1.028250 | -1.140595 |
| 8        | O       | -2.417433 | -2.615438 | 0.850370  |
| 9        | N       | 2.582075  | -0.117639 | 1.144218  |
| 10       | N       | -2.581563 | -0.117730 | 1.143472  |
| 11       | C       | 1.282624  | 1.885517  | 0.470806  |
| 12       | C       | 1.277754  | 3.168557  | -0.111779 |
| 13       | C       | -2.515012 | 1.207343  | 0.608491  |
| 14       | C       | -1.277021 | 3.168560  | -0.112053 |
| 15       | C       | -3.679577 | 3.128258  | -0.335494 |
| 16       | C       | 3.696492  | 1.843725  | 0.211731  |
| 17       | C       | -6.329154 | -1.056589 | -1.823464 |
| 18       | C       | -5.363856 | -2.239268 | 0.512278  |
| 19       | C       | -4.496969 | -1.553763 | -0.342301 |
| 20       | C       | 2.515572  | 1.207383  | 0.609147  |
| 21       | C       | -1.282029 | 1.885492  | 0.470480  |
| 22       | C       | 3.680365  | 3.128228  | -0.334698 |
| 23       | C       | 2.470081  | 3.787570  | -0.503517 |
| 24       | C       | -3.695837 | 1.843734  | 0.210882  |
| 25       | C       | 0.000394  | 3.900988  | -0.349050 |
| 26       | C       | -2.469254 | 3.787595  | -0.504039 |
| 27       | C       | 7.221551  | -1.730907 | -0.978958 |
| 28       | C       | 5.363625  | -2.239928 | 0.511873  |
| 29       | C       | -6.717519 | -2.318029 | 0.190749  |
| 30       | C       | 4.496529  | -1.554042 | -0.342213 |
| 31       | C       | -4.972614 | -0.965720 | -1.516782 |
| 32       | C       | 6.328273  | -1.056729 | -1.823871 |
| 33       | C       | 6.717136  | -2.318835 | 0.189829  |

| Atom No. | Element | X         | Y         | Z         |
|----------|---------|-----------|-----------|-----------|
| 34       | C       | -8.683928 | -1.852786 | -1.337620 |
| 35       | C       | -7.222252 | -1.730372 | -0.978013 |
| 36       | C       | 4.971833  | -0.965746 | -1.516684 |
| 37       | C       | 8.683089  | -1.853563 | -1.339040 |
| 38       | C       | 0.000229  | 1.340171  | 1.025625  |
| 39       | H       | -4.610330 | 3.603286  | -0.632256 |
| 40       | H       | 4.636116  | 1.313895  | 0.330040  |
| 41       | H       | -6.699106 | -0.603477 | -2.740298 |
| 42       | H       | -4.976768 | -2.722855 | 1.403012  |
| 43       | H       | 4.611181  | 3.603228  | -0.631305 |
| 44       | H       | 2.414834  | 4.781089  | -0.935209 |
| 45       | H       | -4.635512 | 1.313957  | 0.329002  |
| 46       | H       | -2.413906 | 4.781124  | -0.935694 |
| 47       | H       | 4.976772  | -2.723690 | 1.402615  |
| 48       | H       | -7.392232 | -2.853853 | 0.854146  |
| 49       | H       | -4.280054 | -0.461222 | -2.181922 |
| 50       | H       | 6.697971  | -0.603403 | -2.740697 |
| 51       | H       | 7.392002  | -2.854963 | 0.852829  |
| 52       | H       | -9.308319 | -1.971388 | -0.446173 |
| 53       | H       | -9.037165 | -0.973961 | -1.887257 |
| 54       | H       | -8.858997 | -2.727855 | -1.977426 |
| 55       | H       | 4.279128  | -0.460941 | -2.181441 |
| 56       | H       | 9.308153  | -1.968129 | -0.447518 |
| 57       | H       | 8.858463  | -2.731082 | -1.975399 |
| 58       | H       | 9.035266  | -0.976665 | -1.892391 |
| 59       | C       | -2.888940 | -0.288256 | 2.564714  |
| 60       | H       | -3.925483 | -0.009153 | 2.803529  |
| 61       | H       | -2.713267 | -1.330280 | 2.834053  |
| 62       | H       | -2.195934 | 0.331995  | 3.136586  |
| 63       | C       | 2.889144  | -0.288106 | 2.565522  |
| 64       | H       | 2.195671  | 0.331734  | 3.137292  |
| 65       | H       | 2.713942  | -1.330243 | 2.834727  |
| 66       | H       | 3.925480  | -0.008495 | 2.804618  |

Cartesian coordinates of the optimized structure of 7

E(RB3LYP) = -1340.23491264 a.u.

Number of imaginary frequencies: 0

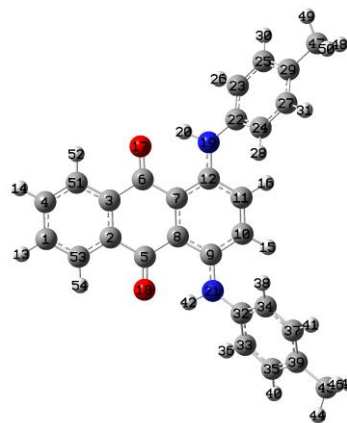

| Atom No. | Element | X         | Y         | Z         |
|----------|---------|-----------|-----------|-----------|
| 1        | C       | -0.700821 | 6.079686  | 0.462865  |
| 2        | C       | -0.701764 | 3.683838  | 0.122234  |
| 3        | C       | 0.701829  | 3.683827  | 0.122225  |
| 4        | C       | 0.700928  | 6.079675  | 0.462855  |
| 5        | C       | -1.463033 | 2.425786  | -0.066297 |
| 6        | C       | 1.463074  | 2.425763  | -0.066319 |
| 7        | C       | 0.721681  | 1.163588  | -0.181060 |
| 8        | C       | -0.721663 | 1.163597  | -0.181057 |
| 9        | C       | -1.434132 | -0.062740 | -0.292325 |
| 10       | C       | -0.683367 | -1.255449 | -0.492931 |
| 11       | C       | 0.683366  | -1.255455 | -0.492931 |
| 12       | C       | 1.434138  | -0.062753 | -0.292327 |
| 13       | H       | -1.244041 | 7.011267  | 0.596888  |
| 14       | H       | 1.244165  | 7.011248  | 0.596871  |
| 15       | H       | -1.213793 | -2.179034 | -0.693135 |
| 16       | H       | 1.213787  | -2.179046 | -0.693128 |
| 17       | O       | 2.708981  | 2.487201  | -0.116899 |
| 18       | O       | -2.708939 | 2.487254  | -0.116854 |
| 19       | N       | 2.805357  | -0.097467 | -0.284376 |
| 20       | H       | 3.225085  | 0.835080  | -0.310602 |
| 21       | N       | -2.805351 | -0.097445 | -0.284389 |
| 22       | C       | 3.661526  | -1.204113 | -0.134968 |
| 23       | C       | 4.898213  | -1.178221 | -0.800324 |
| 24       | C       | 3.378826  | -2.291277 | 0.706881  |
| 25       | C       | 5.811588  | -2.214831 | -0.638464 |
| 26       | H       | 5.132816  | -0.337643 | -1.448178 |
| 27       | C       | 4.296800  | -3.331186 | 0.843578  |

| Atom No. | Element | X         | Y         | Z         |
|----------|---------|-----------|-----------|-----------|
| 28       | H       | 2.457856  | -2.307132 | 1.280523  |
| 29       | C       | 5.526940  | -3.320528 | 0.175189  |
| 30       | H       | 6.763453  | -2.166836 | -1.162907 |
| 31       | H       | 4.056004  | -4.160807 | 1.504793  |
| 32       | C       | -3.661540 | -1.204076 | -0.134975 |
| 33       | C       | -4.898197 | -1.178189 | -0.800386 |
| 34       | C       | -3.378901 | -2.291209 | 0.706936  |
| 35       | C       | -5.811598 | -2.214776 | -0.638526 |
| 36       | H       | -5.132756 | -0.337634 | -1.448285 |
| 37       | C       | -4.296899 | -3.331096 | 0.843634  |
| 38       | H       | -2.457962 | -2.307053 | 1.280628  |
| 39       | C       | -5.527007 | -3.320445 | 0.175186  |
| 40       | H       | -6.763439 | -2.166787 | -1.163014 |
| 41       | H       | -4.056150 | -4.160692 | 1.504898  |
| 42       | H       | -3.225069 | 0.835106  | -0.310659 |
| 43       | C       | -6.505869 | -4.462639 | 0.312537  |
| 44       | H       | -7.541929 | -4.106073 | 0.310495  |
| 45       | H       | -6.409073 | -5.177126 | -0.516340 |
| 46       | H       | -6.343349 | -5.019385 | 1.241495  |
| 47       | C       | 6.505774  | -4.462746 | 0.312537  |
| 48       | H       | 6.408999  | -5.177199 | -0.516370 |
| 49       | H       | 7.541842  | -4.106198 | 0.310551  |
| 50       | H       | 6.343206  | -5.019524 | 1.241467  |
| 51       | C       | 1.398095  | 4.889481  | 0.290034  |
| 52       | H       | 2.482215  | 4.863045  | 0.281113  |
| 53       | C       | -1.398008 | 4.889503  | 0.290053  |
| 54       | H       | -2.482129 | 4.863084  | 0.281146  |

Cartesian coordinates of the optimized structure of **8**

E(RB3LYP) = -1529.53116123 a.u.

Number of imaginary frequencies: 0

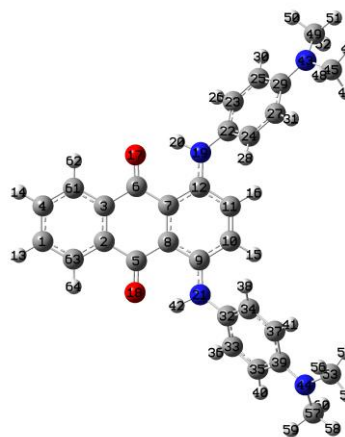

| Atom No. | Element | X         | Y         | Z         |
|----------|---------|-----------|-----------|-----------|
| 1        | C       | -0.701116 | 6.748777  | 0.506634  |
| 2        | C       | -0.702054 | 4.352944  | 0.161021  |
| 3        | C       | 0.702031  | 4.352963  | 0.161060  |
| 4        | C       | 0.701022  | 6.748795  | 0.506666  |
| 5        | C       | -1.464074 | 3.095675  | -0.029258 |
| 6        | C       | 1.464083  | 3.095707  | -0.029152 |
| 7        | C       | 0.722592  | 1.838804  | -0.153905 |
| 8        | C       | -0.722558 | 1.838781  | -0.153935 |
| 9        | C       | -1.434932 | 0.612330  | -0.273366 |
| 10       | C       | -0.682751 | -0.582240 | -0.471264 |
| 11       | C       | 0.682891  | -0.582218 | -0.471248 |
| 12       | C       | 1.435020  | 0.612382  | -0.273331 |
| 13       | H       | -1.244398 | 7.680246  | 0.642323  |
| 14       | H       | 1.244273  | 7.680279  | 0.642381  |
| 15       | H       | -1.215478 | -1.506160 | -0.665141 |
| 16       | H       | 1.215658  | -1.506124 | -0.665087 |
| 17       | O       | 2.712399  | 3.157404  | -0.071549 |
| 18       | O       | -2.712391 | 3.157358  | -0.071745 |
| 19       | N       | 2.803143  | 0.574278  | -0.263944 |
| 20       | H       | 3.225909  | 1.506211  | -0.259528 |
| 21       | N       | -2.803060 | 0.574177  | -0.263988 |
| 22       | C       | 3.647943  | -0.551271 | -0.153500 |
| 23       | C       | 4.828621  | -0.588367 | -0.907948 |
| 24       | C       | 3.408247  | -1.610731 | 0.732944  |
| 25       | C       | 5.730908  | -1.638877 | -0.792482 |
| 26       | H       | 5.035862  | 0.219454  | -1.605019 |
| 27       | C       | 4.295367  | -2.677068 | 0.838715  |
| 28       | H       | 2.523821  | -1.596368 | 1.362618  |
| 29       | C       | 5.491089  | -2.718593 | 0.087322  |
| 30       | H       | 6.624733  | -1.616465 | -1.404241 |
| 31       | H       | 4.056634  | -3.472819 | 1.534127  |
| 32       | C       | -3.647865 | -0.551363 | -0.153583 |

| Atom No. | Element | X         | Y         | Z         |
|----------|---------|-----------|-----------|-----------|
| 33       | C       | -4.828635 | -0.588330 | -0.907904 |
| 34       | C       | -3.408121 | -1.610919 | 0.732735  |
| 35       | C       | -5.730949 | -1.638815 | -0.792459 |
| 36       | H       | -5.035925 | 0.219583  | -1.604856 |
| 37       | C       | -4.295270 | -2.677236 | 0.838487  |
| 38       | H       | -2.523657 | -1.596638 | 1.362354  |
| 39       | C       | -5.491055 | -2.718648 | 0.087195  |
| 40       | H       | -6.624850 | -1.616302 | -1.404101 |
| 41       | H       | -4.056527 | -3.473065 | 1.533810  |
| 42       | H       | -3.225863 | 1.506086  | -0.259801 |
| 43       | N       | 6.400392  | -3.765387 | 0.220743  |
| 44       | N       | -6.400298 | -3.765457 | 0.220579  |
| 45       | C       | 6.000943  | -4.957474 | 0.948190  |
| 46       | H       | 5.126698  | -5.461562 | 0.503619  |
| 47       | H       | 6.833808  | -5.663562 | 0.960415  |
| 48       | H       | 5.759085  | -4.718364 | 1.990492  |
| 49       | C       | 7.478441  | -3.889788 | -0.745095 |
| 50       | H       | 8.125881  | -3.005214 | -0.726426 |
| 51       | H       | 8.095562  | -4.751125 | -0.481293 |
| 52       | H       | 7.118643  | -4.025840 | -1.778447 |
| 53       | C       | -6.001021 | -4.957348 | 0.948408  |
| 54       | H       | -6.833811 | -5.663522 | 0.960485  |
| 55       | H       | -5.126590 | -5.461447 | 0.504222  |
| 56       | H       | -5.759490 | -4.718012 | 1.990748  |
| 57       | C       | -7.478734 | -3.889635 | -0.744843 |
| 58       | H       | -8.095578 | -4.751206 | -0.481170 |
| 59       | H       | -8.126348 | -3.005190 | -0.725562 |
| 60       | H       | -7.119317 | -4.025184 | -1.778386 |
| 61       | C       | 1.397708  | 5.559032  | 0.331796  |
| 62       | H       | 2.481873  | 5.531697  | 0.323229  |
| 63       | C       | -1.397766 | 5.558997  | 0.331728  |
| 64       | H       | -2.481930 | 5.531641  | 0.323103  |

Cartesian coordinates of the optimized structure of **9**

E(RB3LYP) = -2437.36582586 a.u.

Number of imaginary frequencies: 0

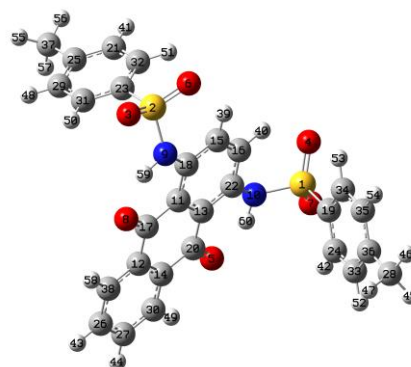

| Atom No. | Element | X         | Y         | Z         |
|----------|---------|-----------|-----------|-----------|
| 1        | S       | -3.342205 | -1.526368 | -2.005691 |
| 2        | S       | 3.339433  | -1.533019 | 2.002978  |
| 3        | O       | 4.161644  | -1.018258 | 3.095132  |
| 4        | O       | -2.744575 | -2.862143 | -2.051508 |
| 5        | O       | -2.009446 | 2.220223  | -1.804454 |
| 6        | O       | 2.740697  | -2.868420 | 2.044922  |
| 7        | O       | -4.164896 | -1.008211 | -3.095879 |
| 8        | O       | 2.010788  | 2.215081  | 1.807501  |
| 9        | N       | 2.090244  | -0.382587 | 1.888108  |
| 10       | N       | -2.092073 | -0.377172 | -1.888926 |
| 11       | C       | 0.540943  | 0.881965  | 0.472760  |
| 12       | C       | 0.529356  | 3.436159  | 0.463831  |
| 13       | C       | -0.540910 | 0.883350  | -0.472053 |
| 14       | C       | -0.525587 | 3.437500  | -0.460001 |
| 15       | C       | 0.507563  | -1.555106 | 0.459718  |
| 16       | C       | -0.510592 | -1.553780 | -0.462614 |
| 17       | C       | 1.094992  | 2.162555  | 0.971616  |
| 18       | C       | 1.066741  | -0.349523 | 0.939358  |
| 19       | C       | -4.265490 | -1.390661 | -0.475687 |
| 20       | C       | -1.093339 | 2.165345  | -0.969057 |
| 21       | C       | 4.795663  | -2.200442 | -1.727590 |
| 22       | C       | -1.068314 | -0.346790 | -0.940397 |
| 23       | C       | 4.264167  | -1.394121 | 0.474138  |
| 24       | C       | -5.159299 | -0.327661 | -0.313034 |
| 25       | C       | 5.691872  | -1.141631 | -1.919118 |
| 26       | C       | 0.530113  | 5.854452  | 0.465232  |
| 27       | C       | -0.522379 | 5.855791  | -0.458914 |
| 28       | C       | -6.445084 | -0.991121 | 3.218498  |
| 29       | C       | 5.865961  | -0.216160 | -0.877095 |
| 30       | C       | -1.048274 | 4.653263  | -0.920366 |

| Atom No. | Element | X         | Y         | Z         |
|----------|---------|-----------|-----------|-----------|
| 31       | C       | 5.160719  | -0.332746 | 0.316041  |
| 32       | C       | 4.078972  | -2.335121 | -0.538418 |
| 33       | C       | -5.863494 | -0.213791 | 0.880979  |
| 34       | C       | -4.081997 | -2.335894 | 0.533213  |
| 35       | C       | -4.797655 | -2.203935 | 1.723315  |
| 36       | C       | -5.691096 | -1.143625 | 1.919401  |
| 37       | C       | 6.447071  | -0.986115 | -3.217156 |
| 38       | C       | 1.054015  | 4.650589  | 0.925468  |
| 39       | H       | 0.893390  | -2.494264 | 0.836110  |
| 40       | H       | -0.897563 | -2.491896 | -0.840432 |
| 41       | H       | 4.659053  | -2.935960 | -2.516191 |
| 42       | H       | -5.311343 | 0.384831  | -1.117486 |
| 43       | H       | 0.939032  | 6.794697  | 0.824338  |
| 44       | H       | -0.929746 | 6.797074  | -0.817062 |
| 45       | H       | -7.487052 | -0.701098 | 3.044270  |
| 46       | H       | -6.442197 | -1.920591 | 3.795648  |
| 47       | H       | -5.992911 | -0.211648 | 3.845579  |
| 48       | H       | 6.570210  | 0.602896  | -1.000970 |
| 49       | H       | -1.861694 | 4.628968  | -1.637046 |
| 50       | H       | 5.314007  | 0.376298  | 1.123288  |
| 51       | H       | 3.403478  | -3.169580 | -0.386540 |
| 52       | H       | -6.565586 | 0.606580  | 1.008361  |
| 53       | H       | -3.408555 | -3.171353 | 0.377781  |
| 54       | H       | -4.662375 | -2.942755 | 2.509052  |
| 55       | H       | 7.489315  | -0.698133 | -3.041214 |
| 56       | H       | 6.443316  | -1.913755 | -3.797245 |
| 57       | H       | 5.996477  | -0.204050 | -3.842143 |
| 58       | H       | 1.867363  | 4.624226  | 1.642156  |
| 59       | H       | 2.399428  | 0.549578  | 2.186331  |
| 60       | H       | -2.400409 | 0.555776  | -2.185555 |

Cartesian coordinates of the optimized structure of **10**

E(RB3LYP) = -2626.67121233 a.u.

Number of imaginary frequencies: 0

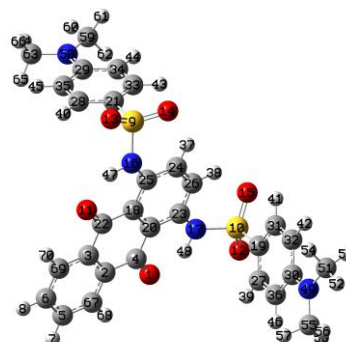

| Atom No. | Element | X         | Y         | Z         |
|----------|---------|-----------|-----------|-----------|
| 1        | O       | -1.709567 | 2.560166  | -2.094372 |
| 2        | C       | -0.450874 | 3.777626  | -0.536642 |
| 3        | C       | 0.450913  | 3.777550  | 0.536982  |
| 4        | C       | -0.930087 | 2.504304  | -1.129045 |
| 5        | C       | -0.450752 | 6.196188  | -0.535734 |
| 6        | C       | 0.450856  | 6.196112  | 0.536362  |
| 7        | H       | -0.800377 | 7.137057  | -0.951656 |
| 8        | H       | 0.800506  | 7.136922  | 0.952396  |
| 9        | S       | 2.863861  | -1.248558 | 2.632458  |
| 10       | S       | -2.864011 | -1.248149 | -2.632661 |
| 11       | O       | 1.709608  | 2.559872  | 2.094539  |
| 12       | O       | -3.506200 | -0.686472 | -3.820032 |
| 13       | O       | 3.505969  | -0.687081 | 3.819967  |
| 14       | O       | 2.157424  | -2.532277 | 2.669174  |
| 15       | O       | -2.157584 | -2.531865 | -2.669634 |
| 16       | N       | 1.741751  | -0.034443 | 2.212108  |
| 17       | N       | -1.741861 | -0.034111 | -2.212194 |
| 18       | C       | 0.456202  | 1.225875  | 0.555849  |
| 19       | C       | -4.048345 | -1.313431 | -1.309223 |
| 20       | C       | -0.456218 | 1.225955  | -0.555825 |
| 21       | C       | 4.048287  | -1.313637 | 1.309091  |
| 22       | C       | 0.930108  | 2.504143  | 1.129219  |
| 23       | C       | -0.894544 | -0.004595 | -1.109000 |
| 24       | C       | 0.422862  | -1.211010 | 0.540294  |
| 25       | C       | 0.894498  | -0.004757 | 1.108868  |
| 26       | C       | -0.422900 | -1.210931 | -0.540611 |
| 27       | C       | -5.038336 | -0.328654 | -1.214426 |
| 28       | C       | 5.038198  | -0.328766 | 1.214430  |
| 29       | C       | 5.918808  | -1.388164 | -0.802508 |
| 30       | C       | -5.918675 | -1.388232 | 0.802536  |
| 31       | C       | -3.994682 | -2.339762 | -0.362205 |
| 32       | C       | -4.913639 | -2.379992 | 0.676532  |
| 33       | C       | 3.994788  | -2.339914 | 0.362007  |
| 34       | C       | 4.913833  | -2.380005 | -0.676658 |
| 35       | C       | 5.958358  | -0.363206 | 0.178964  |

| Atom No. | Element | X         | Y         | Z         |
|----------|---------|-----------|-----------|-----------|
| 36       | C       | -5.958408 | -0.363235 | -0.178885 |
| 37       | H       | 0.734583  | -2.150250 | 0.979384  |
| 38       | H       | -0.734638 | -2.150106 | -0.979827 |
| 39       | H       | -5.096687 | 0.455109  | -1.963192 |
| 40       | H       | 5.096416  | 0.454969  | 1.963238  |
| 41       | H       | -3.245641 | -3.118559 | -0.453910 |
| 42       | H       | -4.852223 | -3.192750 | 1.389403  |
| 43       | H       | 3.245795  | -3.118770 | 0.453602  |
| 44       | H       | 4.852530  | -3.192714 | -1.389595 |
| 45       | H       | 6.718643  | 0.406727  | 0.135362  |
| 46       | H       | -6.718769 | 0.406619  | -0.135185 |
| 47       | H       | 2.023901  | 0.894163  | 2.544064  |
| 48       | H       | -2.024044 | 0.894549  | -2.543969 |
| 49       | N       | -6.827245 | -1.420858 | 1.835554  |
| 50       | N       | 6.827494  | -1.420686 | -1.835425 |
| 51       | C       | -6.779017 | -2.494589 | 2.815115  |
| 52       | H       | -7.564957 | -2.339701 | 3.555521  |
| 53       | H       | -6.937501 | -3.478952 | 2.352607  |
| 54       | H       | -5.816806 | -2.517031 | 3.344120  |
| 55       | C       | -7.867602 | -0.408969 | 1.927619  |
| 56       | H       | -8.477695 | -0.603046 | 2.810858  |
| 57       | H       | -7.444650 | 0.600185  | 2.024598  |
| 58       | H       | -8.528843 | -0.418738 | 1.049694  |
| 59       | C       | 6.779280  | -2.494233 | -2.815186 |
| 60       | H       | 7.565380  | -2.339336 | -3.555420 |
| 61       | H       | 6.937560  | -3.478684 | -2.352804 |
| 62       | H       | 5.817156  | -2.516476 | -3.344367 |
| 63       | C       | 7.867597  | -0.408538 | -1.927523 |
| 64       | H       | 8.477855  | -0.602602 | -2.810650 |
| 65       | H       | 7.444416  | 0.600504  | -2.024699 |
| 66       | H       | 8.528727  | -0.418027 | -1.049517 |
| 67       | C       | -0.899355 | 4.993062  | -1.070770 |
| 68       | H       | -1.594265 | 4.966915  | -1.902854 |
| 69       | C       | 0.899428  | 4.992910  | 1.071253  |
| 70       | H       | 1.594340  | 4.966646  | 1.903332  |

Cartesian coordinates of the optimized structure of **11**

E(RB3LYP) = -1568.73908622 a.u.

Number of imaginary frequencies: 0

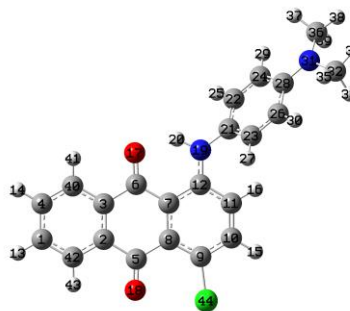

| Atom No. | Element | X         | Y         | Z         |
|----------|---------|-----------|-----------|-----------|
| 1        | C       | 5.909513  | -2.313814 | 0.300028  |
| 2        | C       | 4.149104  | -0.666394 | 0.111396  |
| 3        | C       | 3.193225  | -1.689681 | 0.079316  |
| 4        | C       | 4.953706  | -3.337591 | 0.267572  |
| 5        | C       | 3.749902  | 0.765343  | 0.027984  |
| 6        | C       | 1.747278  | -1.377902 | -0.042761 |
| 7        | C       | 1.316285  | 0.027696  | -0.100742 |
| 8        | C       | 2.286822  | 1.089049  | -0.092021 |
| 9        | C       | 1.844019  | 2.412223  | -0.188779 |
| 10       | C       | 0.470636  | 2.693667  | -0.306398 |
| 11       | C       | -0.467513 | 1.692623  | -0.299221 |
| 12       | C       | -0.084473 | 0.332455  | -0.177618 |
| 13       | H       | 6.964833  | -2.557878 | 0.385894  |
| 14       | H       | 5.267767  | -4.376046 | 0.328811  |
| 15       | H       | 0.159600  | 3.727699  | -0.412017 |
| 16       | H       | -1.516880 | 1.937251  | -0.410231 |
| 17       | O       | 0.944862  | -2.328890 | -0.096007 |
| 18       | O       | 4.613807  | 1.632168  | 0.063665  |
| 19       | N       | -1.028901 | -0.651143 | -0.167518 |
| 20       | H       | -0.636613 | -1.593482 | -0.192918 |
| 21       | C       | -2.436438 | -0.502637 | -0.079734 |
| 22       | C       | -3.256130 | -1.233111 | -0.948256 |

| Atom No. | Element | X         | Y         | Z         |
|----------|---------|-----------|-----------|-----------|
| 23       | C       | -3.055123 | 0.289009  | 0.896598  |
| 24       | C       | -4.641754 | -1.175584 | -0.854596 |
| 25       | H       | -2.797343 | -1.851201 | -1.715562 |
| 26       | C       | -4.440428 | 0.370699  | 0.984556  |
| 27       | H       | -2.446216 | 0.840718  | 1.606871  |
| 28       | C       | -5.277223 | -0.370159 | 0.118281  |
| 29       | H       | -5.229219 | -1.757410 | -1.554341 |
| 30       | H       | -4.869313 | 1.003946  | 1.751673  |
| 31       | N       | -6.661040 | -0.319828 | 0.228403  |
| 32       | C       | -7.270076 | 0.676018  | 1.093153  |
| 33       | H       | -7.017313 | 1.708069  | 0.800898  |
| 34       | H       | -8.355524 | 0.566501  | 1.054695  |
| 35       | H       | -6.961903 | 0.534597  | 2.136308  |
| 36       | C       | -7.480031 | -0.935469 | -0.801440 |
| 37       | H       | -7.278209 | -2.011053 | -0.873369 |
| 38       | H       | -8.532952 | -0.816738 | -0.538655 |
| 39       | H       | -7.321465 | -0.492485 | -1.798089 |
| 40       | C       | 3.602178  | -3.028168 | 0.156839  |
| 41       | H       | 2.843822  | -3.802716 | 0.128010  |
| 42       | C       | 5.509070  | -0.984105 | 0.221873  |
| 43       | H       | 6.227179  | -0.171541 | 0.243730  |
| 44       | Cl      | 2.877922  | 3.828079  | -0.194432 |



Cartesian coordinates of the optimized structure of **12**

E(RB3LYP) = -1568.73908622 a.u.

Number of imaginary frequencies: 0

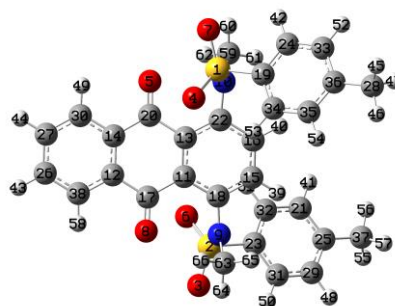

| Atom No. | Element | X         | Y         | Z         |
|----------|---------|-----------|-----------|-----------|
| 1        | S       | 3.902684  | 0.230832  | -0.448976 |
| 2        | S       | -3.902816 | 0.231067  | 0.448748  |
| 3        | O       | -4.950253 | 0.599458  | 1.403088  |
| 4        | O       | 3.530578  | 1.080487  | 0.684792  |
| 5        | O       | 1.968497  | 2.591975  | -1.826979 |
| 6        | O       | -3.530604 | 1.080574  | -0.685090 |
| 7        | O       | 4.950049  | 0.599080  | -1.403453 |
| 8        | O       | -1.968484 | 2.592211  | 1.826841  |
| 9        | N       | -2.498366 | -0.046946 | 1.338678  |
| 10       | N       | 2.498164  | -0.047271 | -1.338750 |
| 11       | C       | -0.599128 | 1.276765  | 0.377930  |
| 12       | C       | -0.546751 | 3.844682  | 0.438376  |
| 13       | C       | 0.599076  | 1.276699  | -0.377988 |
| 14       | C       | 0.547102  | 3.844621  | -0.438325 |
| 15       | C       | -0.619558 | -1.151870 | 0.316463  |
| 16       | C       | 0.619336  | -1.151934 | -0.316324 |
| 17       | C       | -1.130678 | 2.571767  | 0.934947  |
| 18       | C       | -1.234620 | 0.045978  | 0.678939  |
| 19       | C       | 4.351731  | -1.371675 | 0.231569  |
| 20       | C       | 1.130764  | 2.571640  | -0.935005 |
| 21       | C       | -4.190415 | -3.014980 | -1.982491 |
| 22       | C       | 1.234465  | 0.045840  | -0.678931 |
| 23       | C       | -4.351824 | -1.371520 | -0.231621 |
| 24       | C       | 5.183305  | -2.222830 | -0.501786 |
| 25       | C       | -5.013581 | -3.891410 | -1.264591 |
| 26       | C       | -0.545835 | 6.261470  | 0.438569  |
| 27       | C       | 0.546630  | 6.261408  | -0.438310 |
| 28       | C       | 5.377654  | -5.250174 | 1.814673  |
| 29       | C       | -5.506019 | -3.472469 | -0.018380 |
| 30       | C       | 1.090416  | 5.058457  | -0.877552 |
| 31       | C       | -5.183389 | -2.222606 | 0.501824  |
| 32       | C       | -3.856898 | -1.757712 | -1.477495 |
| 33       | C       | 5.505972  | -3.472623 | 0.018560  |

| Atom No. | Element | X         | Y         | Z         |
|----------|---------|-----------|-----------|-----------|
| 34       | C       | 3.856831  | -1.757733 | 1.477495  |
| 35       | C       | 4.190386  | -3.014935 | 1.982636  |
| 36       | C       | 5.013568  | -3.891426 | 1.264831  |
| 37       | C       | -5.377551 | -5.250265 | -1.814243 |
| 38       | C       | -1.089846 | 5.058581  | 0.877702  |
| 39       | H       | -1.121549 | -2.085320 | 0.550986  |
| 40       | H       | 1.121269  | -2.085432 | -0.550784 |
| 41       | H       | -3.812003 | -3.314197 | -2.956815 |
| 42       | H       | 5.586969  | -1.895264 | -1.453983 |
| 43       | H       | -0.970777 | 7.202616  | 0.776305  |
| 44       | H       | 0.971747  | 7.202505  | -0.775963 |
| 45       | H       | 6.464327  | -5.359692 | 1.915007  |
| 46       | H       | 4.932296  | -5.417374 | 2.799999  |
| 47       | H       | 5.034430  | -6.053219 | 1.150684  |
| 48       | H       | -6.159973 | -4.131949 | 0.547648  |
| 49       | H       | 1.935737  | 5.031362  | -1.556574 |
| 50       | H       | -5.587079 | -1.894941 | 1.453976  |
| 51       | H       | -3.239366 | -1.072853 | -2.048509 |
| 52       | H       | 6.159924  | -4.132160 | -0.547405 |
| 53       | H       | 3.239290  | -1.072823 | 2.048437  |
| 54       | H       | 3.811993  | -3.314049 | 2.956999  |
| 55       | H       | -6.464252 | -5.360218 | -1.913761 |
| 56       | H       | -4.932854 | -5.417237 | -2.799906 |
| 57       | H       | -5.033498 | -6.053213 | -1.150560 |
| 58       | H       | -1.935176 | 5.031584  | 1.556717  |
| 59       | C       | 2.538140  | -0.211256 | -2.793683 |
| 60       | H       | 3.577577  | -0.174898 | -3.119856 |
| 61       | H       | 2.095560  | -1.171671 | -3.085043 |
| 62       | H       | 2.001836  | 0.612711  | -3.272197 |
| 63       | C       | -2.538470 | -0.210937 | 2.793589  |
| 64       | H       | -3.577865 | -0.173539 | 3.119781  |
| 65       | H       | -2.096800 | -1.171758 | 3.085021  |
| 66       | H       | -2.001382 | 0.612533  | 3.272079  |

Cartesian coordinates of the optimized structure of **13**

(Terminal *tert*-butyl groups were replaced with methyl groups.)

E(RB3LYP) = -1340.23723443 a.u.

Number of imaginary frequencies: 0

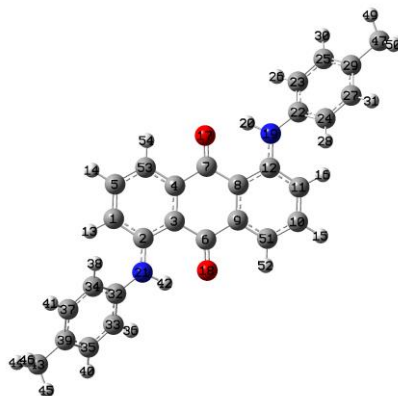

| Atom No. | Element | X         | Y         | Z         |
|----------|---------|-----------|-----------|-----------|
| 1        | C       | -3.190363 | 2.031576  | -0.268568 |
| 2        | C       | -2.834174 | 0.660637  | -0.237204 |
| 3        | C       | -1.441152 | 0.319725  | -0.281475 |
| 4        | C       | -0.476224 | 1.359553  | -0.303171 |
| 5        | C       | -2.221678 | 3.018334  | -0.300880 |
| 6        | C       | -0.991686 | -1.073628 | -0.325485 |
| 7        | C       | 0.991700  | 1.073544  | -0.325436 |
| 8        | C       | 1.441160  | -0.319806 | -0.281474 |
| 9        | C       | 0.476238  | -1.359635 | -0.303206 |
| 10       | C       | 2.221706  | -3.018402 | -0.300961 |
| 11       | C       | 3.190385  | -2.031637 | -0.268625 |
| 12       | C       | 2.834181  | -0.660702 | -0.237215 |
| 13       | H       | -4.238633 | 2.302814  | -0.296018 |
| 14       | H       | -2.528753 | 4.060496  | -0.333097 |
| 15       | H       | 2.528790  | -4.060560 | -0.333212 |
| 16       | H       | 4.238656  | -2.302864 | -0.296089 |
| 17       | O       | 1.784166  | 2.031258  | -0.379529 |
| 18       | O       | -1.784136 | -2.031356 | -0.379553 |
| 19       | N       | 3.780596  | 0.329907  | -0.209462 |
| 20       | H       | 3.386662  | 1.262496  | -0.344760 |
| 21       | N       | -3.780618 | -0.329943 | -0.209481 |
| 22       | C       | 5.165910  | 0.233633  | 0.029737  |
| 23       | C       | 6.017621  | 1.115347  | -0.654683 |
| 24       | C       | 5.725886  | -0.637688 | 0.976081  |
| 25       | C       | 7.386906  | 1.111596  | -0.408647 |
| 26       | H       | 5.594248  | 1.801544  | -1.383625 |
| 27       | C       | 7.102264  | -0.642517 | 1.197472  |

| Atom No. | Element | X         | Y         | Z         |
|----------|---------|-----------|-----------|-----------|
| 28       | H       | 5.084037  | -1.286914 | 1.562174  |
| 29       | C       | 7.961631  | 0.224034  | 0.511794  |
| 30       | H       | 8.023264  | 1.808152  | -0.950206 |
| 31       | H       | 7.513014  | -1.325194 | 1.938139  |
| 32       | C       | -5.165929 | -0.233620 | 0.029719  |
| 33       | C       | -6.017678 | -1.115273 | -0.654731 |
| 34       | C       | -5.725865 | 0.637694  | 0.976092  |
| 35       | C       | -7.386964 | -1.111471 | -0.408690 |
| 36       | H       | -5.594336 | -1.801465 | -1.383695 |
| 37       | C       | -7.102241 | 0.642576  | 1.197487  |
| 38       | H       | -5.083985 | 1.286873  | 1.562204  |
| 39       | C       | -7.961647 | -0.223915 | 0.511780  |
| 40       | H       | -8.023353 | -1.807982 | -0.950271 |
| 41       | H       | -7.512960 | 1.325245  | 1.938179  |
| 42       | H       | -3.386717 | -1.262543 | -0.344810 |
| 43       | C       | -9.454290 | -0.195422 | 0.742417  |
| 44       | H       | -9.969068 | 0.390760  | -0.030918 |
| 45       | H       | -9.883764 | -1.203317 | 0.721186  |
| 46       | H       | -9.700968 | 0.254871  | 1.709664  |
| 47       | C       | 9.454275  | 0.195613  | 0.742428  |
| 48       | H       | 9.969119  | -0.390226 | -0.031121 |
| 49       | H       | 9.883644  | 1.203561  | 0.721573  |
| 50       | H       | 9.700994  | -0.255010 | 1.709511  |
| 51       | C       | 0.860548  | -2.695369 | -0.305084 |
| 52       | H       | 0.093656  | -3.460093 | -0.323188 |
| 53       | C       | -0.860523 | 2.695290  | -0.305017 |
| 54       | H       | -0.093625 | 3.460008  | -0.323097 |

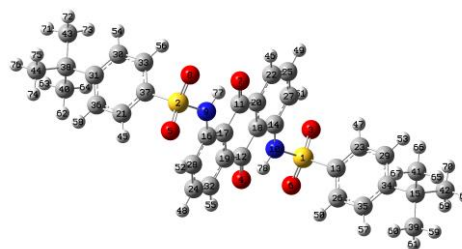

Cartesian coordinates of the optimized structure of **14**

E(RB3LYP) = -2673.24185913 a.u.

Number of imaginary frequencies: 0

| Atom No. | Element | X         | Y         | Z         |
|----------|---------|-----------|-----------|-----------|
| 1        | S       | 4.526451  | -2.923566 | 0.429243  |
| 2        | S       | -4.527321 | 2.923812  | -0.428959 |
| 3        | O       | 4.750985  | -3.729265 | -0.772115 |
| 4        | O       | 1.347899  | -1.073002 | 2.080642  |
| 5        | O       | -4.752324 | 3.729261  | 0.772479  |
| 6        | O       | 4.716193  | -3.462751 | 1.773222  |
| 7        | O       | -1.348252 | 1.074259  | -2.080303 |
| 8        | O       | -4.717193 | 3.463077  | -1.772887 |
| 9        | N       | -2.904824 | 2.417282  | -0.441662 |
| 10       | N       | 2.904203  | -2.416304 | 0.442028  |
| 11       | C       | -0.753207 | 0.594814  | -1.104196 |
| 12       | C       | 0.752767  | -0.593662 | 1.104533  |
| 13       | C       | 5.495880  | -1.424885 | 0.276412  |
| 14       | C       | 2.190157  | -1.813608 | -0.592378 |
| 15       | C       | 7.789990  | 2.252706  | -0.109998 |
| 16       | C       | -2.190753 | 1.814561  | 0.592723  |
| 17       | C       | -1.115960 | 0.928776  | 0.284669  |
| 18       | C       | 1.115447  | -0.927715 | -0.284326 |
| 19       | C       | -0.378250 | 0.352139  | 1.347757  |
| 20       | C       | 0.377749  | -0.351062 | -1.347416 |
| 21       | C       | -5.999870 | 1.039209  | 0.967413  |
| 22       | C       | 0.694634  | -0.632854 | -2.673390 |
| 23       | C       | 5.999658  | -1.039758 | -0.967507 |
| 24       | C       | -1.744352 | 1.508401  | 2.959582  |
| 25       | C       | 1.743695  | -1.507511 | -2.959235 |
| 26       | C       | 5.728261  | -0.645673 | 1.409270  |
| 27       | C       | 2.478322  | -2.099060 | -1.942247 |
| 28       | C       | -2.479001 | 2.099922  | 1.942592  |
| 29       | C       | 6.730230  | 0.140836  | -1.065792 |
| 30       | C       | -6.462358 | -0.533667 | -1.288991 |
| 31       | C       | -6.976240 | -0.957215 | -0.053346 |
| 32       | C       | -0.695196 | 0.633859  | 2.673733  |
| 33       | C       | -5.727901 | 0.645435  | -1.409351 |
| 34       | C       | 6.977114  | 0.956296  | 0.052936  |
| 35       | C       | 6.463245  | 0.533077  | 1.288699  |
| 36       | C       | -6.729917 | -0.141728 | 1.065485  |
| 37       | C       | -5.496070 | 1.424666  | -0.276393 |
| 38       | C       | -7.788564 | -2.253997 | 0.109354  |
| 39       | C       | 7.963606  | 3.007744  | 1.221480  |

| Atom No. | Element | X         | Y         | Z         |
|----------|---------|-----------|-----------|-----------|
| 40       | C       | -7.061617 | -3.189488 | 1.105251  |
| 41       | C       | 7.063333  | 3.188408  | -1.105907 |
| 42       | C       | 9.196436  | 1.910660  | -0.657466 |
| 43       | C       | -7.961706 | -3.008975 | -1.222219 |
| 44       | C       | -9.195219 | -1.912615 | 0.656705  |
| 45       | H       | -5.839923 | 1.667477  | 1.836561  |
| 46       | H       | 0.110668  | -0.168649 | -3.459071 |
| 47       | H       | 5.839292  | -1.668023 | -1.836580 |
| 48       | H       | -1.984406 | 1.744868  | 3.992485  |
| 49       | H       | 1.983694  | -1.744042 | -3.992135 |
| 50       | H       | 5.353147  | -0.964450 | 2.376504  |
| 51       | H       | 3.265733  | -2.805921 | -2.170353 |
| 52       | H       | -3.266507 | 2.806680  | 2.170693  |
| 53       | H       | 7.120463  | 0.425245  | -2.038342 |
| 54       | H       | -6.635138 | -1.121641 | -2.182799 |
| 55       | H       | -0.111208 | 0.169681  | 3.459413  |
| 56       | H       | -5.352775 | 0.964456  | -2.376499 |
| 57       | H       | 6.636444  | 1.121041  | 2.182432  |
| 58       | H       | -7.120187 | -0.426387 | 2.037947  |
| 59       | H       | 8.546405  | 3.919673  | 1.052200  |
| 60       | H       | 7.001209  | 3.307641  | 1.651406  |
| 61       | H       | 8.500613  | 2.407817  | 1.964961  |
| 62       | H       | -6.951582 | -2.729917 | 2.092981  |
| 63       | H       | -7.628194 | -4.119562 | 1.232220  |
| 64       | H       | -6.060480 | -3.448641 | 0.742715  |
| 65       | H       | 7.630282  | 4.118237  | -1.233012 |
| 66       | H       | 6.953014  | 2.728795  | -2.093587 |
| 67       | H       | 6.062338  | 3.448006  | -0.743301 |
| 68       | H       | 9.786020  | 2.826802  | -0.781396 |
| 69       | H       | 9.736262  | 1.250146  | 0.030388  |
| 70       | H       | 9.148145  | 1.412656  | -1.631409 |
| 71       | H       | -8.544127 | -3.921174 | -1.053097 |
| 72       | H       | -8.498888 | -2.409205 | -1.965699 |
| 73       | H       | -6.999131 | -3.308413 | -1.652069 |
| 74       | H       | -9.147250 | -1.414697 | 1.630708  |
| 75       | H       | -9.735252 | -1.252256 | -0.031135 |
| 76       | H       | -9.784426 | -2.829020 | 0.780478  |
| 77       | H       | -2.585211 | 2.144947  | -1.378019 |
| 78       | H       | 2.584704  | -2.143812 | 1.378388  |

Cartesian coordinates of the optimized structure of **15**  
 (Terminal butyl groups were replaced with methyl groups.)

E(RB3LYP) = -2626.67311205 a.u.

Number of imaginary frequencies: 0

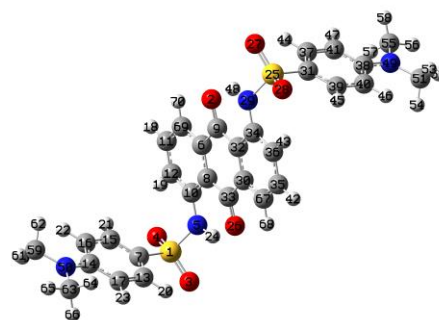

| Atom No. | Element | X         | Y         | Z         |
|----------|---------|-----------|-----------|-----------|
| 1        | S       | -4.742260 | -2.690698 | 0.415592  |
| 2        | O       | 1.349485  | 0.856586  | -2.208223 |
| 3        | O       | -4.950742 | -3.230329 | 1.758003  |
| 4        | O       | -5.067276 | -3.457859 | -0.789443 |
| 5        | N       | -3.065811 | -2.365865 | 0.398433  |
| 6        | C       | -0.448108 | -0.457366 | -1.438527 |
| 7        | C       | -5.552937 | -1.112974 | 0.301888  |
| 8        | C       | -1.205987 | -0.977965 | -0.360465 |
| 9        | C       | 0.731520  | 0.433751  | -1.219828 |
| 10       | C       | -2.329571 | -1.809581 | -0.645618 |
| 11       | C       | -1.889845 | -1.561982 | -3.021203 |
| 12       | C       | -2.646042 | -2.097179 | -1.989292 |
| 13       | C       | -5.690526 | -0.323058 | 1.448795  |
| 14       | C       | -6.786904 | 1.419027  | 0.134390  |
| 15       | C       | -6.036743 | -0.650135 | -0.924981 |
| 16       | C       | -6.646235 | 0.593681  | -1.009767 |
| 17       | C       | -6.297867 | 0.919969  | 1.369808  |
| 18       | H       | -2.151678 | -1.800018 | -4.048557 |
| 19       | H       | -3.475185 | -2.761329 | -2.197735 |
| 20       | H       | -5.336847 | -0.692734 | 2.406020  |
| 21       | H       | -5.954744 | -1.276245 | -1.806686 |
| 22       | H       | -7.022997 | 0.921101  | -1.970761 |
| 23       | H       | -6.400636 | 1.504492  | 2.275584  |
| 24       | H       | -2.717934 | -2.105153 | 1.327227  |
| 25       | S       | 4.599036  | 2.648245  | -0.587600 |
| 26       | O       | -1.416267 | -1.084870 | 2.008879  |
| 27       | O       | 4.818180  | 3.082646  | -1.966091 |
| 28       | O       | 4.808097  | 3.546575  | 0.550916  |
| 29       | N       | 2.959100  | 2.180485  | -0.602742 |
| 30       | C       | 0.355260  | 0.263014  | 1.237850  |
| 31       | C       | 5.529587  | 1.162908  | -0.292926 |
| 32       | C       | 1.111257  | 0.785176  | 0.159260  |
| 33       | C       | -0.814246 | -0.641725 | 1.019885  |
| 34       | C       | 2.223181  | 1.633574  | 0.442868  |
| 35       | C       | 1.774793  | 1.398436  | 2.818068  |

| Atom No. | Element | X         | Y         | Z         |
|----------|---------|-----------|-----------|-----------|
| 36       | C       | 2.528625  | 1.936107  | 1.786038  |
| 37       | C       | 5.695390  | 0.232975  | -1.325787 |
| 38       | C       | 6.975621  | -1.216754 | 0.165495  |
| 39       | C       | 6.092287  | 0.916703  | 0.962037  |
| 40       | C       | 6.806281  | -0.251342 | 1.189622  |
| 41       | C       | 6.404841  | -0.936159 | -1.103783 |
| 42       | H       | 2.028983  | 1.647551  | 3.844721  |
| 43       | H       | 3.344650  | 2.615914  | 1.995539  |
| 44       | H       | 5.280932  | 0.433943  | -2.308813 |
| 45       | H       | 5.986556  | 1.652377  | 1.751718  |
| 46       | H       | 7.239762  | -0.409765 | 2.169233  |
| 47       | H       | 6.524588  | -1.633002 | -1.923946 |
| 48       | H       | 2.638800  | 1.893344  | -1.533501 |
| 49       | N       | 7.671921  | -2.382264 | 0.391146  |
| 50       | N       | -7.381457 | 2.657821  | 0.052446  |
| 51       | C       | 8.288026  | -2.624453 | 1.685918  |
| 52       | H       | 8.782144  | -3.596802 | 1.670875  |
| 53       | H       | 9.042246  | -1.863415 | 1.931545  |
| 54       | H       | 7.542166  | -2.637960 | 2.491947  |
| 55       | C       | 7.863171  | -3.340482 | -0.686171 |
| 56       | H       | 8.414864  | -4.201118 | -0.305481 |
| 57       | H       | 6.903807  | -3.703039 | -1.078511 |
| 58       | H       | 8.434718  | -2.912966 | -1.522250 |
| 59       | C       | -7.919753 | 3.126551  | -1.214506 |
| 60       | H       | -8.721515 | 2.474018  | -1.588860 |
| 61       | H       | -8.333795 | 4.126656  | -1.079183 |
| 62       | H       | -7.140584 | 3.186350  | -1.985969 |
| 63       | C       | -7.562319 | 3.461975  | 1.250719  |
| 64       | H       | -6.601834 | 3.692971  | 1.730098  |
| 65       | H       | -8.035986 | 4.406452  | 0.979448  |
| 66       | H       | -8.201991 | 2.960884  | 1.991185  |
| 67       | C       | 0.689418  | 0.560879  | 2.555849  |
| 68       | H       | 0.090980  | 0.137650  | 3.353704  |
| 69       | C       | -0.791520 | -0.742225 | -2.757196 |
| 70       | H       | -0.189879 | -0.322217 | -3.554406 |

Cartesian coordinates of the optimized structure of **16**

E(RB3LYP) = -1568.74061805 a.u.

Number of imaginary frequencies: 0

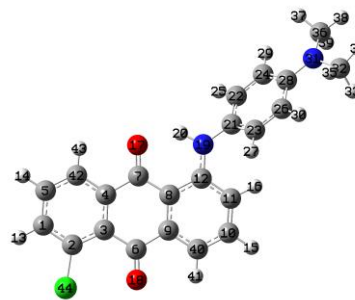

| Atom | Element | X         | Y         | Z         |
|------|---------|-----------|-----------|-----------|
| 1    | C       | 5.657922  | -1.826626 | 0.297263  |
| 2    | C       | 5.244164  | -0.499533 | 0.159827  |
| 3    | C       | 3.876396  | -0.173590 | 0.037987  |
| 4    | C       | 2.944973  | -1.239696 | 0.060451  |
| 5    | C       | 4.721653  | -2.856618 | 0.313958  |
| 6    | C       | 3.367680  | 1.223502  | -0.117620 |
| 7    | C       | 1.467143  | -1.015889 | -0.061027 |
| 8    | C       | 0.963960  | 0.348405  | -0.162080 |
| 9    | C       | 1.884266  | 1.428528  | -0.205105 |
| 10   | C       | 0.072028  | 2.998911  | -0.430872 |
| 11   | C       | -0.854310 | 1.975216  | -0.382285 |
| 12   | C       | -0.444335 | 0.625392  | -0.230483 |
| 13   | H       | 6.717731  | -2.037660 | 0.389816  |
| 14   | H       | 5.054697  | -3.885094 | 0.420615  |
| 15   | H       | -0.274539 | 4.021359  | -0.557198 |
| 16   | H       | -1.910918 | 2.192511  | -0.482954 |
| 17   | O       | 0.723407  | -2.013751 | -0.070485 |
| 18   | O       | 4.117597  | 2.189249  | -0.171451 |
| 19   | N       | -1.351765 | -0.393317 | -0.179418 |
| 20   | H       | -0.924710 | -1.319881 | -0.184358 |
| 21   | C       | -2.762141 | -0.305397 | -0.079572 |
| 22   | C       | -3.554733 | -1.134754 | -0.882459 |

| Atom | Element | X         | Y         | Z         |
|------|---------|-----------|-----------|-----------|
| 23   | C       | -3.409411 | 0.523719  | 0.845709  |
| 24   | C       | -4.940524 | -1.137245 | -0.774591 |
| 25   | H       | -3.074584 | -1.783307 | -1.610699 |
| 26   | C       | -4.796321 | 0.544282  | 0.945830  |
| 27   | H       | -2.822430 | 1.153507  | 1.507448  |
| 28   | C       | -5.604974 | -0.295803 | 0.146643  |
| 29   | H       | -5.505400 | -1.795008 | -1.424001 |
| 30   | H       | -5.247240 | 1.209899  | 1.671808  |
| 31   | N       | -6.989835 | -0.305214 | 0.272734  |
| 32   | C       | -7.637335 | 0.731513  | 1.057976  |
| 33   | H       | -7.444377 | 1.745974  | 0.672307  |
| 34   | H       | -8.715922 | 0.562661  | 1.051087  |
| 35   | H       | -7.306663 | 0.698315  | 2.102963  |
| 36   | C       | -7.786029 | -1.015802 | -0.713108 |
| 37   | H       | -7.532991 | -2.082621 | -0.726311 |
| 38   | H       | -8.841495 | -0.933546 | -0.446110 |
| 39   | H       | -7.656693 | -0.622996 | -1.734931 |
| 40   | C       | 1.445145  | 2.739464  | -0.331040 |
| 41   | H       | 2.179376  | 3.535474  | -0.360614 |
| 42   | C       | 3.368047  | -2.564420 | 0.194828  |
| 43   | H       | 2.614644  | -3.343254 | 0.202845  |
| 44   | Cl      | 6.530300  | 0.689886  | 0.155834  |

Cartesian coordinates of the optimized structure of **17**

E(RB3LYP) = -2117.30947670 a.u.

Number of imaginary frequencies: 0

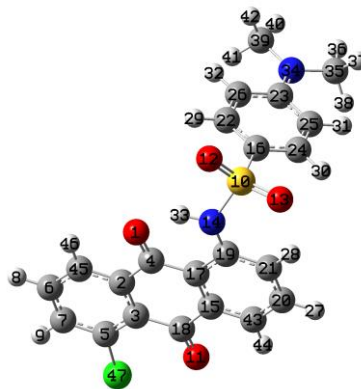

| Atom No. | Element | X         | Y         | Z         |
|----------|---------|-----------|-----------|-----------|
| 1        | O       | 1.097533  | -0.925523 | -2.094278 |
| 2        | C       | 3.010595  | 0.094541  | -1.179376 |
| 3        | C       | 3.793252  | 0.444138  | -0.052637 |
| 4        | C       | 1.717047  | -0.651815 | -1.056066 |
| 5        | C       | 4.997609  | 1.141521  | -0.285801 |
| 6        | C       | 4.607824  | 1.116837  | -2.674585 |
| 7        | C       | 5.395684  | 1.472427  | -1.583901 |
| 8        | H       | 4.928463  | 1.378371  | -3.678805 |
| 9        | H       | 6.327878  | 2.008809  | -1.724040 |
| 10       | S       | -2.435245 | -2.361189 | -0.717368 |
| 11       | O       | 3.927500  | 0.340345  | 2.325393  |
| 12       | O       | -2.635858 | -2.711580 | -2.122197 |
| 13       | O       | -2.812588 | -3.266000 | 0.371057  |
| 14       | N       | -0.750601 | -2.106522 | -0.637612 |
| 15       | C       | 2.009083  | -0.681830 | 1.413727  |
| 16       | C       | -3.188237 | -0.781661 | -0.405052 |
| 17       | C       | 1.235332  | -1.029305 | 0.279211  |
| 18       | C       | 3.307712  | 0.062241  | 1.308252  |
| 19       | C       | 0.006251  | -1.732948 | 0.466986  |
| 20       | C       | 0.383685  | -1.707302 | 2.865200  |
| 21       | C       | -0.393177 | -2.071806 | 1.775866  |
| 22       | C       | -3.217488 | 0.183810  | -1.417977 |
| 23       | C       | -4.360324 | 1.739789  | 0.077843  |
| 24       | C       | -3.750881 | -0.498634 | 0.842379  |

| Atom No. | Element | X         | Y         | Z         |
|----------|---------|-----------|-----------|-----------|
| 25       | C       | -4.330004 | 0.739590  | 1.081923  |
| 26       | C       | -3.792555 | 1.422429  | -1.183936 |
| 27       | H       | 0.055926  | -1.982719 | 3.863919  |
| 28       | H       | -1.301446 | -2.644422 | 1.913128  |
| 29       | H       | -2.805944 | -0.043455 | -2.396414 |
| 30       | H       | -3.754329 | -1.258995 | 1.615563  |
| 31       | H       | -4.769285 | 0.925789  | 2.053988  |
| 32       | H       | -3.810619 | 2.145749  | -1.989640 |
| 33       | H       | -0.353807 | -1.815737 | -1.536433 |
| 34       | N       | -4.925277 | 2.972441  | 0.314710  |
| 35       | C       | -5.552129 | 3.252485  | 1.596791  |
| 36       | H       | -5.932735 | 4.274795  | 1.593556  |
| 37       | H       | -6.394423 | 2.575940  | 1.800318  |
| 38       | H       | -4.835389 | 3.162829  | 2.423888  |
| 39       | C       | -4.994867 | 3.961175  | -0.749649 |
| 40       | H       | -5.459276 | 4.869707  | -0.363867 |
| 41       | H       | -3.995503 | 4.225639  | -1.119659 |
| 42       | H       | -5.592620 | 3.608666  | -1.602362 |
| 43       | C       | 1.582616  | -1.012729 | 2.695923  |
| 44       | H       | 2.201391  | -0.728579 | 3.538792  |
| 45       | C       | 3.417155  | 0.428012  | -2.473613 |
| 46       | H       | 2.783968  | 0.134478  | -3.302556 |
| 47       | Cl      | 6.087355  | 1.649236  | 0.985881  |

Cartesian coordinates of the optimized structure of **18**

E(RB3LYP) = -2751.8185173 a.u.

Number of imaginary frequencies: 0

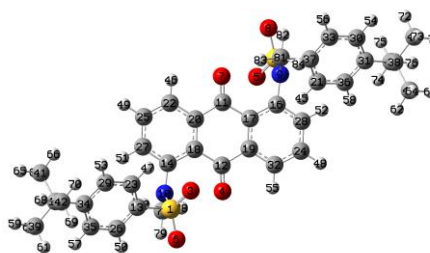

| Atom No. | Element | X         | Y         | Z         |
|----------|---------|-----------|-----------|-----------|
| 1        | S       | -4.284243 | 1.878759  | -0.318031 |
| 2        | S       | 4.284380  | -1.829799 | 0.411457  |
| 3        | O       | -3.512131 | 1.337292  | -1.439372 |
| 4        | O       | -1.081074 | 2.482747  | 0.355759  |
| 5        | O       | 3.587897  | -1.241578 | 1.558105  |
| 6        | O       | -4.573379 | 3.307603  | -0.176219 |
| 7        | O       | 1.075283  | -2.428591 | -0.073988 |
| 8        | O       | 4.527809  | -3.268740 | 0.287668  |
| 9        | N       | 3.467072  | -1.346404 | -0.987040 |
| 10       | N       | -3.527518 | 1.388550  | 1.110323  |
| 11       | C       | 0.624383  | -1.295565 | 0.034594  |
| 12       | C       | -0.652090 | 1.347493  | 0.195133  |
| 13       | C       | -5.861849 | 1.016146  | -0.322870 |
| 14       | C       | -2.746070 | 0.190745  | 1.088692  |
| 15       | C       | -9.661379 | -1.113821 | -0.327439 |
| 16       | C       | 2.688803  | -0.147000 | -0.937681 |
| 17       | C       | 1.361385  | -0.088660 | -0.441886 |
| 18       | C       | -1.404860 | 0.136010  | 0.632455  |
| 19       | C       | 0.709694  | 1.160986  | -0.407515 |
| 20       | C       | -0.750585 | -1.112001 | 0.608933  |
| 21       | C       | 6.071735  | 0.229706  | 0.916697  |
| 22       | C       | -1.391007 | -2.266449 | 1.076146  |
| 23       | C       | -5.981600 | -0.209913 | -0.980657 |
| 24       | C       | 2.626423  | 2.240784  | -1.407962 |
| 25       | C       | -2.691215 | -2.197268 | 1.556960  |
| 26       | C       | -6.958099 | 1.574884  | 0.331517  |
| 27       | C       | -3.365529 | -0.975447 | 1.546208  |
| 28       | C       | 3.296426  | 1.016745  | -1.417003 |
| 29       | C       | -7.204966 | -0.873905 | -0.965438 |
| 30       | C       | 8.158746  | -0.976536 | -0.482934 |
| 31       | C       | 8.378747  | 0.278375  | 0.104656  |
| 32       | C       | 1.340257  | 2.313738  | -0.891297 |
| 33       | C       | 6.926503  | -1.623753 | -0.385005 |
| 34       | C       | -8.328921 | -0.343772 | -0.306722 |

| Atom No. | Element | X          | Y         | Z         |
|----------|---------|------------|-----------|-----------|
| 43       | C       | 10.766970  | 0.237334  | -0.812635 |
| 44       | C       | 10.295594  | 1.213835  | 1.441791  |
| 45       | H       | 5.263867   | 0.681872  | 1.481844  |
| 46       | H       | -0.845082  | -3.202473 | 1.041743  |
| 47       | H       | -5.130686  | -0.621887 | -1.512186 |
| 48       | H       | 3.114521   | 3.131338  | -1.793508 |
| 49       | H       | -3.187882  | -3.089721 | 1.926842  |
| 50       | H       | -6.866427  | 2.542682  | 0.813512  |
| 51       | H       | -4.392348  | -0.905518 | 1.891163  |
| 52       | H       | 4.310988   | 0.942418  | -1.795511 |
| 53       | H       | -7.282793  | -1.822176 | -1.489366 |
| 54       | H       | 8.955864   | -1.474398 | -1.023002 |
| 55       | H       | 0.797663   | 3.251082  | -0.843135 |
| 56       | H       | 6.783175   | -2.604712 | -0.825973 |
| 57       | H       | -9.016087  | 1.351395  | 0.846007  |
| 58       | H       | 7.440402   | 1.822470  | 1.293312  |
| 59       | H       | -11.693238 | -0.979791 | 0.419632  |
| 60       | H       | -10.506672 | -0.261812 | 1.515113  |
| 61       | H       | -10.993522 | 0.596691  | 0.038043  |
| 62       | H       | 8.818916   | 3.021872  | -0.082074 |
| 63       | H       | 10.468137  | 2.934785  | -0.715810 |
| 64       | H       | 9.116979   | 2.286110  | -1.664712 |
| 65       | H       | -10.398025 | -3.074744 | 0.290223  |
| 66       | H       | -8.710063  | -3.101227 | -0.238289 |
| 67       | H       | -9.126860  | -2.428924 | 1.345676  |
| 68       | H       | -11.080628 | -1.829439 | -1.825617 |
| 69       | H       | -10.295184 | -0.298883 | -2.261959 |
| 70       | H       | -9.406217  | -1.822964 | -2.398960 |
| 71       | H       | 11.703052  | 0.805089  | -0.854324 |
| 72       | H       | 10.994658  | -0.739345 | -0.370936 |
| 73       | H       | 10.431325  | 0.078212  | -1.843780 |
| 74       | H       | 9.619978   | 1.800261  | 2.073047  |
| 75       | H       | 10.462201  | 0.249812  | 1.935495  |
| 76       | H       | 11.254929  | 1.743440  | 1.397586  |

|    |   |            |           |           |
|----|---|------------|-----------|-----------|
| 35 | C | -8.176016  | 0.893832  | 0.336231  |
| 36 | C | 7.308564   | 0.859514  | 0.808460  |
| 37 | C | 5.883315   | -1.013295 | 0.308450  |
| 38 | C | 9.727272   | 1.014996  | 0.016187  |
| 39 | C | -10.770689 | -0.390145 | 0.459140  |
| 40 | C | 9.515429   | 2.395927  | -0.649550 |
| 41 | C | -9.457002  | -2.512078 | 0.303797  |
| 42 | C | -10.134646 | -1.275628 | -1.791895 |

|    |   |           |           |           |
|----|---|-----------|-----------|-----------|
| 77 | C | -3.410805 | 2.296701  | 2.254930  |
| 78 | H | -2.381831 | 2.653326  | 2.356012  |
| 79 | H | -4.056585 | 3.158135  | 2.084780  |
| 80 | H | -3.724596 | 1.780601  | 3.169587  |
| 81 | C | 3.278488  | -2.273359 | -2.106564 |
| 82 | H | 3.934292  | -3.132248 | -1.963898 |
| 83 | H | 2.246062  | -2.633274 | -2.139193 |
| 84 | H | 3.534976  | -1.771243 | -3.046336 |

Cartesian coordinates of the optimized structure of **19**

(Terminal *tert*-butyl groups were replaced with methyl groups.)

E(RB3LYP) = -1991.68566348 a.u.

Number of imaginary frequencies: 0

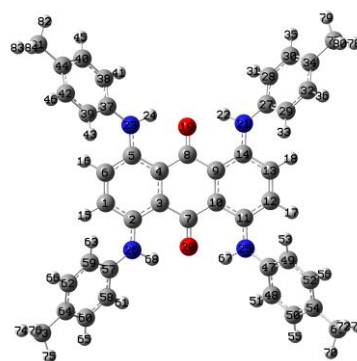

| Atom No. | Element | X         | Y         | Z         |
|----------|---------|-----------|-----------|-----------|
| 1        | C       | -3.702472 | -0.684856 | -0.510489 |
| 2        | C       | -2.498748 | -1.433761 | -0.547688 |
| 3        | C       | -1.270382 | -0.717654 | -0.651085 |
| 4        | C       | -1.270442 | 0.717575  | -0.651093 |
| 5        | C       | -2.498873 | 1.433578  | -0.547718 |
| 6        | C       | -3.702531 | 0.684569  | -0.510505 |
| 7        | C       | 0.000052  | -1.441391 | -0.763927 |
| 8        | C       | -0.000065 | 1.441419  | -0.763904 |
| 9        | C       | 1.270369  | 0.717678  | -0.651083 |
| 10       | C       | 1.270428  | -0.717549 | -0.651110 |
| 11       | C       | 2.498859  | -1.433555 | -0.547757 |
| 12       | C       | 3.702519  | -0.684551 | -0.510572 |
| 13       | C       | 3.702462  | 0.684876  | -0.510541 |
| 14       | C       | 2.498739  | 1.433782  | -0.547698 |
| 15       | H       | -4.647359 | -1.215185 | -0.530907 |
| 16       | H       | -4.647465 | 1.214813  | -0.530943 |
| 17       | H       | 4.647450  | -1.214799 | -0.531048 |
| 18       | H       | 4.647349  | 1.215204  | -0.530980 |
| 19       | O       | -0.000114 | 2.695083  | -0.935074 |
| 20       | O       | 0.000102  | -2.695051 | -0.935123 |
| 21       | N       | 2.544925  | 2.809294  | -0.552967 |

| Atom No. | Element | X         | Y         | Z         |
|----------|---------|-----------|-----------|-----------|
| 43       | H       | -4.358264 | 2.414071  | 1.453166  |
| 44       | C       | -5.568827 | 5.515397  | 0.688414  |
| 45       | H       | -4.734526 | 6.787837  | -0.838809 |
| 46       | H       | -6.101268 | 4.006431  | 2.129857  |
| 47       | C       | 3.584480  | -3.657250 | -0.136947 |
| 48       | C       | 3.701601  | -4.912986 | -0.756514 |
| 49       | C       | 4.461507  | -3.351791 | 0.917202  |
| 50       | C       | 4.670194  | -5.821814 | -0.342582 |
| 51       | H       | 3.025747  | -5.166533 | -1.569311 |
| 52       | C       | 5.437806  | -4.266092 | 1.307486  |
| 53       | H       | 4.358309  | -2.413992 | 1.453059  |
| 54       | C       | 5.568777  | -5.515385 | 0.688429  |
| 55       | H       | 4.734387  | -6.787887 | -0.838696 |
| 56       | H       | 6.101295  | -4.006358 | 2.129777  |
| 57       | C       | -3.584202 | -3.657528 | -0.136838 |
| 58       | C       | -3.701283 | -4.913252 | -0.756429 |
| 59       | C       | -4.461210 | -3.352131 | 0.917348  |
| 60       | C       | -4.669824 | -5.822134 | -0.342483 |
| 61       | H       | -3.025445 | -5.166752 | -1.569254 |
| 62       | C       | -5.437454 | -4.266481 | 1.307644  |
| 63       | H       | -4.358030 | -2.414335 | 1.453215  |



|    |   |           |           |           |
|----|---|-----------|-----------|-----------|
| 22 | H | 1.650088  | 3.232804  | -0.799350 |
| 23 | N | -2.545170 | 2.809082  | -0.553051 |
| 24 | H | -1.650350 | 3.232644  | -0.799420 |
| 25 | N | 2.545152  | -2.809061 | -0.553092 |
| 26 | N | -2.544927 | -2.809271 | -0.552979 |
| 27 | C | 3.584226  | 3.657525  | -0.136823 |
| 28 | C | 3.701362  | 4.913233  | -0.756436 |
| 29 | C | 4.461208  | 3.352111  | 0.917377  |
| 30 | C | 4.669929  | 5.822088  | -0.342494 |
| 31 | H | 3.025544  | 5.166738  | -1.569277 |
| 32 | C | 5.437482  | 4.266433  | 1.307670  |
| 33 | H | 4.357994  | 2.414323  | 1.453252  |
| 34 | C | 5.568464  | 5.515706  | 0.688569  |
| 35 | H | 4.734139  | 6.788140  | -0.838643 |
| 36 | H | 6.100939  | 4.006738  | 2.129998  |
| 37 | C | -3.584516 | 3.657268  | -0.136926 |
| 38 | C | -3.701689 | 4.912964  | -0.756561 |
| 39 | C | -4.461500 | 3.351841  | 0.917265  |
| 40 | C | -4.670289 | 5.821792  | -0.342645 |
| 41 | H | -3.025867 | 5.166477  | -1.569396 |
| 42 | C | -5.437811 | 4.266139  | 1.307532  |

|    |   |           |           |           |
|----|---|-----------|-----------|-----------|
| 64 | C | -5.568385 | -5.515770 | 0.688561  |
| 65 | H | -4.733991 | -6.788199 | -0.838616 |
| 66 | H | -6.100928 | -4.006798 | 2.129963  |
| 67 | H | 1.650339  | -3.232620 | -0.799484 |
| 68 | H | -1.650092 | -3.232769 | -0.799394 |
| 69 | C | 6.648003  | -6.487724 | 1.102992  |
| 70 | H | 6.324486  | -7.526263 | 0.972563  |
| 71 | H | 7.560458  | -6.355916 | 0.505282  |
| 72 | H | 6.927548  | -6.352046 | 2.153440  |
| 73 | C | -6.647560 | -6.488157 | 1.103143  |
| 74 | H | -7.560201 | -6.356063 | 0.505780  |
| 75 | H | -6.324172 | -7.526677 | 0.972252  |
| 76 | H | -6.926753 | -6.352817 | 2.153730  |
| 77 | C | 6.647669  | 6.488062  | 1.103151  |
| 78 | H | 7.560195  | 6.356146  | 0.505575  |
| 79 | H | 6.324199  | 7.526594  | 0.972556  |
| 80 | H | 6.927077  | 6.352502  | 2.153652  |
| 81 | C | -6.648060 | 6.487733  | 1.102968  |
| 82 | H | -6.324645 | 7.526270  | 0.972280  |
| 83 | H | -7.560606 | 6.355734  | 0.505436  |
| 84 | H | -6.927423 | 6.352239  | 2.153488  |

Cartesian coordinates of the optimized structure of **20**

E(RB3LYP) = -4657.69514443 a.u.

Number of imaginary frequencies: 0

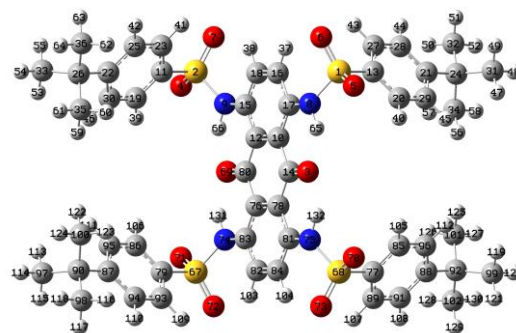

| Atom No. | Element | X         | Y        | Z         |
|----------|---------|-----------|----------|-----------|
| 1        | S       | 2.706436  | 3.774376 | 2.786221  |
| 2        | S       | -2.703416 | 3.774135 | -2.788940 |
| 3        | O       | 1.526499  | 0.003866 | 2.227805  |
| 4        | O       | -3.259145 | 3.239571 | -4.029371 |
| 5        | O       | 3.260575  | 3.240511 | 4.027659  |
| 6        | O       | 2.031948  | 5.072554 | 2.731493  |
| 7        | O       | -2.027897 | 5.071855 | -2.736033 |
| 8        | N       | 1.605498  | 2.566055 | 2.313956  |

| Atom No. | Element | X         | Y         | Z         |
|----------|---------|-----------|-----------|-----------|
| 67       | S       | -2.707041 | -3.768188 | -2.785029 |
| 68       | S       | 2.703961  | -3.767880 | 2.787625  |
| 69       | O       | -1.526814 | 0.003188  | -2.227691 |
| 70       | O       | 3.263102  | -3.231889 | 4.025917  |
| 71       | O       | -3.264703 | -3.232857 | -4.024269 |
| 72       | O       | -2.030239 | -5.065331 | -2.734273 |
| 73       | O       | 2.026298  | -5.064641 | 2.738568  |
| 74       | N       | -1.607234 | -2.558884 | -2.312798 |

|    |   |           |          |           |     |   |           |           |           |
|----|---|-----------|----------|-----------|-----|---|-----------|-----------|-----------|
| 9  | N | -1.602896 | 2.565413 | -2.316649 | 75  | N | 1.604453  | -2.558271 | 2.315411  |
| 10 | C | 0.418172  | 1.285603 | 0.580736  | 76  | C | -0.418492 | -1.278431 | -0.580600 |
| 11 | C | -3.987595 | 3.773413 | -1.540689 | 77  | C | 3.985391  | -3.771661 | 1.536576  |
| 12 | C | -0.416818 | 1.285427 | -0.582142 | 78  | C | 0.416921  | -1.278258 | 0.581960  |
| 13 | C | 3.991874  | 3.771531 | 1.539261  | 79  | C | -3.989680 | -3.770078 | -1.535210 |
| 14 | C | 0.829352  | 0.003759 | 1.183475  | 80  | C | -0.829532 | 0.003384  | -1.183446 |
| 15 | C | -0.822612 | 2.518688 | -1.163335 | 81  | C | 0.823195  | -2.511509 | 1.162819  |
| 16 | C | 0.390703  | 3.722247 | 0.563459  | 82  | C | -0.391032 | -3.715060 | -0.563342 |
| 17 | C | 0.825391  | 2.519065 | 1.160556  | 83  | C | -0.826091 | -2.511879 | -1.160171 |
| 18 | C | -0.386262 | 3.722038 | -0.567799 | 84  | C | 0.386654  | -3.714855 | 0.567412  |
| 19 | C | -4.970618 | 2.779670 | -1.574270 | 85  | C | 4.968898  | -2.778213 | 1.564682  |
| 20 | C | 4.974364  | 2.777346 | 1.575064  | 86  | C | -4.972808 | -2.776323 | -1.565472 |
| 21 | C | 6.011679  | 3.741217 | -0.418319 | 87  | C | -6.005296 | -3.747632 | 0.426817  |
| 22 | C | -6.005384 | 3.746469 | 0.419026  | 88  | C | 5.999103  | -3.752285 | -0.427444 |
| 23 | C | -4.004184 | 4.754935 | -0.552904 | 89  | C | 3.999569  | -4.756587 | 0.552152  |
| 24 | C | 7.132807  | 3.691417 | -1.471191 | 90  | C | -7.124195 | -3.701882 | 1.482252  |
| 25 | C | -5.009220 | 4.732386 | 0.416523  | 91  | C | 5.002582  | -4.737801 | -0.419458 |
| 26 | C | -7.125453 | 3.698396 | 1.473116  | 92  | C | 7.117010  | -3.708119 | -1.484007 |
| 27 | C | 4.009973  | 4.751856 | 0.550315  | 93  | C | -4.005160 | -4.753818 | -0.549623 |
| 28 | C | 5.015999  | 4.727626 | -0.418039 | 94  | C | -5.009111 | -4.733503 | 0.420983  |
| 29 | C | 5.966761  | 2.771963 | 0.602505  | 95  | C | -5.963087 | -2.774833 | -0.590759 |
| 30 | C | -5.962000 | 2.775958 | -0.600673 | 96  | C | 5.958221  | -2.778246 | 0.589003  |
| 31 | C | 8.504985  | 3.808253 | -0.764802 | 97  | C | -8.497840 | -3.816805 | 0.778410  |
| 32 | C | 7.022869  | 4.832326 | -2.499854 | 98  | C | -7.011674 | -4.846277 | 2.506747  |
| 33 | C | -8.498318 | 3.814905 | 0.768009  | 99  | C | 8.491296  | -3.822596 | -0.781344 |
| 34 | C | 7.058590  | 2.345910 | -2.232574 | 100 | C | -7.048820 | -2.358990 | 2.248122  |
| 35 | C | -7.050968 | 2.353797 | 2.236076  | 101 | C | 7.041283  | -2.366129 | -2.251423 |
| 36 | C | -7.014028 | 4.840510 | 2.500273  | 102 | C | 7.003200  | -4.853700 | -2.507027 |
| 37 | H | 0.673927  | 4.662354 | 1.019337  | 103 | H | -0.674368 | -4.655186 | -1.019111 |
| 38 | H | -0.668260 | 4.661925 | -1.024899 | 104 | H | 0.668893  | -4.654771 | 1.024304  |
| 39 | H | -4.966884 | 2.035622 | -2.364442 | 105 | H | 4.967095  | -2.031404 | 2.352252  |
| 40 | H | 4.969461  | 2.034271 | 2.366147  | 106 | H | -4.969996 | -2.030482 | -2.353956 |
| 41 | H | -3.255608 | 5.539338 | -0.554066 | 107 | H | 3.250690  | -5.540684 | 0.557549  |
| 42 | H | -5.006502 | 5.507684 | 1.173537  | 108 | H | 4.997937  | -5.515694 | -1.173791 |
| 43 | H | 3.261797  | 5.536639 | 0.549795  | 109 | H | -3.256571 | -5.538200 | -0.553382 |
| 44 | H | 5.014469  | 5.502016 | -1.175986 | 110 | H | -5.005492 | -5.510497 | 1.176250  |
| 45 | H | 6.728392  | 1.999337 | 0.646057  | 111 | H | -6.725188 | -2.002446 | -0.629913 |
| 46 | H | -6.724042 | 2.003644 | -0.642458 | 112 | H | 6.720616  | -2.006069 | 0.626446  |
| 47 | H | 8.671447  | 2.994070 | -0.051854 | 113 | H | -8.666176 | -3.000230 | 0.068644  |
| 48 | H | 9.313650  | 3.773091 | -1.504428 | 114 | H | -9.304919 | -3.784507 | 1.519900  |
| 49 | H | 8.586258  | 4.754109 | -0.217670 | 115 | H | -8.579934 | -4.760803 | 0.228198  |
| 50 | H | 6.080879  | 4.790691 | -3.058179 | 116 | H | -6.068553 | -4.806178 | 3.063266  |
| 51 | H | 7.100265  | 5.817970 | -2.027286 | 117 | H | -7.089686 | -5.830317 | 2.030950  |
| 52 | H | 7.839036  | 4.751492 | -3.225971 | 118 | H | -7.826377 | -4.768207 | 3.234797  |
| 53 | H | -8.665842 | 2.999928 | 0.056218  | 119 | H | 8.660551  | -3.005224 | -0.072713 |
| 54 | H | -9.306226 | 3.780940 | 1.508519  | 120 | H | 9.297673  | -3.791410 | -1.523644 |

|    |   |           |          |           |
|----|---|-----------|----------|-----------|
| 55 | H | -8.579802 | 4.760133 | 0.219825  |
| 56 | H | 7.175582  | 1.488299 | -1.561362 |
| 57 | H | 6.098436  | 2.238441 | -2.749588 |
| 58 | H | 7.856276  | 2.292277 | -2.982817 |
| 59 | H | -7.168978 | 1.495393 | 1.566064  |
| 60 | H | -6.090326 | 2.246605 | 2.752243  |
| 61 | H | -7.847908 | 2.301406 | 2.987200  |
| 62 | H | -6.071504 | 4.799168 | 3.057714  |
| 63 | H | -7.091503 | 5.825606 | 2.026576  |
| 64 | H | -7.829511 | 4.760868 | 3.227285  |
| 65 | H | 1.848331  | 1.645056 | 2.689430  |
| 66 | H | -1.846793 | 1.644314 | -2.691156 |

|     |   |           |           |           |
|-----|---|-----------|-----------|-----------|
| 121 | H | 8.573648  | -4.765961 | -0.230087 |
| 122 | H | -7.167570 | -1.499067 | 1.580195  |
| 123 | H | -6.087601 | -2.252982 | 2.763456  |
| 124 | H | -7.844919 | -2.308272 | 3.000250  |
| 125 | H | 7.160891  | -1.505420 | -1.584666 |
| 126 | H | 6.079613  | -2.260487 | -2.765990 |
| 127 | H | 7.836696  | -2.316545 | -3.004351 |
| 128 | H | 6.059565  | -4.814004 | -3.062700 |
| 129 | H | 7.081407  | -5.837191 | -2.030132 |
| 130 | H | 7.817237  | -4.776694 | -3.235933 |
| 131 | H | -1.850428 | -1.638039 | -2.688375 |
| 132 | H | 1.848555  | -1.637339 | 2.690144  |

Cartesian coordinates of the optimized structure of **21**  
(Terminal hexyl groups were replaced with methyl groups.)  
E(RB3LYP) = -4564.55737465 a.u.  
Number of imaginary frequencies: 0

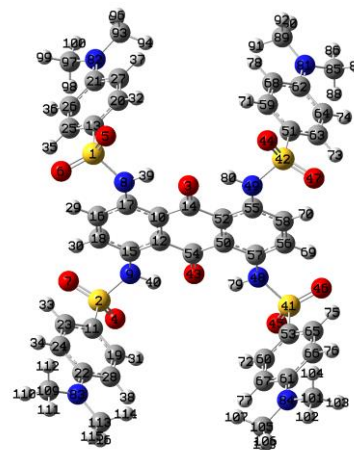

| Atom No. | Element | X         | Y        | Z         |
|----------|---------|-----------|----------|-----------|
| 1        | S       | 2.790619  | 3.806904 | 2.680474  |
| 2        | S       | -2.801901 | 3.798949 | -2.680764 |
| 3        | O       | 1.648682  | 0.002474 | 2.140353  |
| 4        | O       | -3.455482 | 3.232725 | -3.859683 |
| 5        | O       | 3.445782  | 3.243023 | 3.859640  |
| 6        | O       | 2.046907  | 5.068554 | 2.738392  |
| 7        | O       | -2.060918 | 5.062167 | -2.739422 |
| 8        | N       | 1.710796  | 2.565344 | 2.233719  |
| 9        | N       | -1.719573 | 2.560090 | -2.232728 |
| 10       | C       | 0.443648  | 1.281797 | 0.560641  |
| 11       | C       | -3.991415 | 3.926714 | -1.365442 |
| 12       | C       | -0.447992 | 1.280447 | -0.560136 |
| 13       | C       | 3.979480  | 3.936241 | 1.364697  |
| 14       | C       | 0.891055  | 0.001331 | 1.138293  |
| 15       | C       | -0.883069 | 2.512858 | -1.122184 |

| Atom No. | Element | X         | Y         | Z         |
|----------|---------|-----------|-----------|-----------|
| 59       | C       | 5.022924  | -2.985967 | 1.269045  |
| 60       | C       | -5.012851 | -2.997896 | -1.268656 |
| 61       | C       | -5.866458 | -4.119913 | 0.726188  |
| 62       | C       | 5.879249  | -4.107281 | -0.725037 |
| 63       | C       | 3.906880  | -4.963480 | 0.432342  |
| 64       | C       | 4.833827  | -5.055586 | -0.595931 |
| 65       | C       | -3.892540 | -4.972647 | -0.431123 |
| 66       | C       | -4.819110 | -5.066126 | 0.597374  |
| 67       | C       | -5.941571 | -3.086201 | -0.243753 |
| 68       | C       | 5.952027  | -3.072902 | 0.244373  |
| 69       | H       | -0.707155 | -4.658251 | -0.991654 |
| 70       | H       | 0.722456  | -4.656143 | 0.990736  |
| 71       | H       | 5.107289  | -2.198023 | 2.010897  |
| 72       | H       | -5.098989 | -2.210511 | -2.010902 |
| 73       | H       | 3.127578  | -5.711439 | 0.527852  |

|    |   |           |           |           |     |   |           |           |           |
|----|---|-----------|-----------|-----------|-----|---|-----------|-----------|-----------|
| 16 | C | 0.408054  | 3.717717  | 0.547272  | 74  | H | 4.746900  | -5.876403 | -1.296830 |
| 17 | C | 0.874622  | 2.515489  | 1.122974  | 75  | H | -3.111668 | -5.718994 | -0.526409 |
| 18 | C | -0.420471 | 3.716487  | -0.546189 | 76  | H | -4.730362 | -5.886407 | 1.298674  |
| 19 | C | -5.022683 | 2.986024  | -1.269013 | 77  | H | -6.737276 | -2.352709 | -0.201714 |
| 20 | C | 5.012797  | 2.997760  | 1.268793  | 78  | H | 6.746266  | -2.337837 | 0.202089  |
| 21 | C | 5.866347  | 4.119613  | -0.726170 | 79  | H | -1.992491 | -1.647667 | -2.588358 |
| 22 | C | -5.879332 | 4.107747  | 0.724698  | 80  | H | 1.998342  | -1.641615 | 2.587864  |
| 23 | C | -3.906982 | 4.963910  | -0.432736 | 81  | N | 6.794770  | -4.190185 | -1.749773 |
| 24 | C | -4.834004 | 5.056140  | 0.595460  | 82  | N | 6.781451  | 4.203773  | -1.751182 |
| 25 | C | 3.892448  | 4.972428  | 0.431115  | 83  | N | -6.795023 | 4.190854  | 1.749248  |
| 26 | C | 4.818985  | 5.065821  | -0.597418 | 84  | N | -6.781580 | -4.204133 | 1.751178  |
| 27 | C | 5.941485  | 3.085981  | 0.243855  | 85  | C | 6.722817  | -5.284489 | -2.705138 |
| 28 | C | -5.951857 | 3.073072  | -0.244419 | 86  | H | 7.512475  | -5.163824 | -3.447988 |
| 29 | H | 0.707017  | 4.658241  | 0.991899  | 87  | H | 6.856436  | -6.262980 | -2.222186 |
| 30 | H | -0.722522 | 4.656145  | -0.990542 | 88  | H | 5.761251  | -5.293521 | -3.234843 |
| 31 | H | -5.106873 | 2.197856  | -2.010648 | 89  | C | 7.891558  | -3.239673 | -1.828796 |
| 32 | H | 5.098958  | 2.210444  | 2.011108  | 90  | H | 8.497842  | -3.465421 | -2.707157 |
| 33 | H | -3.127746 | 5.711925  | -0.528358 | 91  | H | 7.525914  | -2.208617 | -1.928350 |
| 34 | H | -4.747187 | 5.877094  | 1.296213  | 92  | H | 8.543473  | -3.286540 | -0.944682 |
| 35 | H | 3.111567  | 5.718774  | 0.526341  | 93  | C | 7.880497  | 3.255821  | -1.829562 |
| 36 | H | 4.730184  | 5.886016  | -1.298812 | 94  | H | 7.517292  | 2.223819  | -1.928140 |
| 37 | H | 6.737192  | 2.352489  | 0.201859  | 95  | H | 8.486062  | 3.482215  | -2.708253 |
| 38 | H | -6.745957 | 2.337865  | -0.201962 | 96  | H | 8.532474  | 3.305019  | -0.945618 |
| 39 | H | 1.992421  | 1.647664  | 2.588537  | 97  | C | 6.707239  | 5.297541  | -2.706995 |
| 40 | H | -1.998274 | 1.641618  | -2.587795 | 98  | H | 5.745469  | 5.304615  | -3.236348 |
| 41 | S | -2.790644 | -3.806928 | -2.680349 | 99  | H | 6.839295  | 6.276498  | -2.224544 |
| 42 | S | 2.802084  | -3.798894 | 2.680706  | 100 | H | 7.496841  | 5.177925  | -3.450074 |
| 43 | O | -1.648710 | -0.002482 | -2.140202 | 101 | C | -6.707400 | -5.297970 | 2.706913  |
| 44 | O | 3.455731  | -3.232693 | 3.859600  | 102 | H | -7.496855 | -5.178257 | 3.450134  |
| 45 | O | -3.445797 | -3.243024 | -3.859511 | 103 | H | -6.839687 | -6.276893 | 2.224449  |
| 46 | O | -2.046885 | -5.068548 | -2.738305 | 104 | H | -5.745547 | -5.305209 | 3.236105  |
| 47 | O | 2.061194  | -5.062167 | 2.739350  | 105 | C | -7.880762 | -3.256328 | 1.829443  |
| 48 | N | -1.710900 | -2.565343 | -2.233505 | 106 | H | -8.486393 | -3.482807 | 2.708067  |
| 49 | N | 1.719624  | -2.560094 | 2.232829  | 107 | H | -7.517705 | -2.224278 | 1.928061  |
| 50 | C | -0.443686 | -1.281802 | -0.560480 | 108 | H | -8.532639 | -3.305609 | 0.945428  |
| 51 | C | 3.991514  | -3.926517 | 1.365292  | 109 | C | -6.722878 | 5.284986  | 2.704792  |
| 52 | C | 0.447980  | -1.280453 | 0.560275  | 110 | H | -6.855745 | 6.263555  | 2.221823  |
| 53 | C | -3.979534 | -3.936370 | -1.364608 | 111 | H | -7.512999 | 5.164736  | 3.447214  |
| 54 | C | -0.891073 | -0.001335 | -1.138148 | 112 | H | -5.761557 | 5.293503  | 3.234981  |
| 55 | C | 0.883064  | -2.512860 | 1.122318  | 113 | C | -7.891025 | 3.239512  | 1.829083  |
| 56 | C | -0.408151 | -3.717724 | -0.547064 | 114 | H | -7.524600 | 2.208808  | 1.929527  |
| 57 | C | -0.874697 | -2.515496 | -1.122785 | 115 | H | -8.497549 | 3.465557  | 2.707201  |
| 58 | C | 0.420410  | -3.716490 | 0.546369  | 116 | H | -8.542924 | 3.285136  | 0.944904  |

Cartesian coordinates of the optimized structure of **22**  
 (Terminal hexyl groups were replaced with methyl groups.)

E(RB3LYP) = -2737.38886137 a.u.

Number of imaginary frequencies: 0

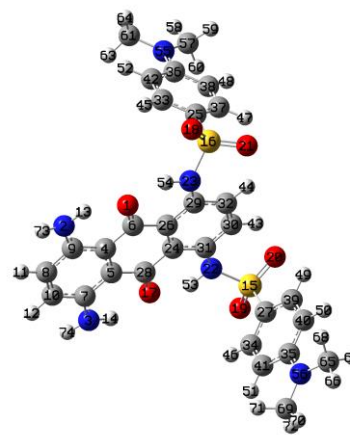

| Atom No. | Element | X         | Y         | Z         |
|----------|---------|-----------|-----------|-----------|
| 1        | O       | 1.717009  | 2.251980  | 2.098124  |
| 2        | N       | 1.867166  | 4.827102  | 2.079242  |
| 3        | N       | -1.862606 | 4.828661  | -2.078658 |
| 4        | C       | 0.471708  | 3.507947  | 0.543212  |
| 5        | C       | -0.468423 | 3.508327  | -0.542531 |
| 6        | C       | 0.924430  | 2.243559  | 1.119359  |
| 7        | C       | -0.940314 | 4.735881  | -1.077841 |
| 8        | C       | 0.453341  | 5.945279  | 0.513318  |
| 9        | C       | 0.944561  | 4.735088  | 1.078568  |
| 10       | C       | -0.448239 | 5.945664  | -0.512443 |
| 11       | H       | 0.814517  | 6.889076  | 0.915581  |
| 12       | H       | -0.808709 | 6.889768  | -0.914620 |
| 13       | H       | 2.104520  | 3.968604  | 2.563371  |
| 14       | H       | -2.101090 | 3.970401  | -2.562627 |
| 15       | S       | -2.869715 | -1.507601 | -2.609041 |
| 16       | S       | 2.869187  | -1.509590 | 2.609249  |
| 17       | O       | -1.715000 | 2.253390  | -2.097253 |
| 18       | O       | 3.542216  | -0.947783 | 3.781277  |
| 19       | O       | -3.542081 | -0.945136 | -3.781132 |
| 20       | O       | -2.191273 | -2.806445 | -2.661573 |
| 21       | O       | 2.190290  | -2.808205 | 2.661600  |
| 22       | N       | -1.719081 | -0.314506 | -2.233339 |
| 23       | N       | 1.718775  | -0.315940 | 2.234433  |
| 24       | C       | -0.449350 | 0.960036  | -0.556521 |
| 25       | C       | 4.020482  | -1.555717 | 1.252815  |
| 26       | C       | 0.450281  | 0.959667  | 0.557410  |
| 27       | C       | -4.021566 | -1.553781 | -1.253083 |
| 28       | C       | -0.922260 | 2.244319  | -1.118610 |
| 29       | C       | 0.880650  | -0.275244 | 1.116870  |
| 30       | C       | -0.416252 | -1.476444 | -0.547342 |
| 31       | C       | -0.880886 | -0.274549 | -1.115847 |
| 32       | C       | 0.414873  | -1.476765 | 0.548522  |
| 33       | C       | 4.999149  | -0.562417 | 1.138324  |
| 34       | C       | -4.999902 | -0.560150 | -1.138611 |
| 35       | C       | -5.834679 | -1.595632 | 0.909684  |
| 36       | C       | 5.832666  | -1.597414 | -0.910729 |
| 37       | C       | 3.949781  | -2.574217 | 0.298954  |

| Atom No. | Element | X         | Y         | Z         |
|----------|---------|-----------|-----------|-----------|
| 38       | C       | 4.840384  | -2.598505 | -0.765112 |
| 39       | C       | -3.951677 | -2.572693 | -0.299604 |
| 40       | C       | -4.842730 | -2.597054 | 0.764084  |
| 41       | C       | -5.892887 | -0.578853 | -0.078657 |
| 42       | C       | 5.891684  | -0.581049 | 0.077988  |
| 43       | H       | -0.721437 | -2.415359 | -0.991945 |
| 44       | H       | 0.719215  | -2.415900 | 0.993247  |
| 45       | H       | 5.071161  | 0.215746  | 1.891690  |
| 46       | H       | -5.071302 | 0.218337  | -1.891701 |
| 47       | H       | 3.209702  | -3.359660 | 0.404744  |
| 48       | H       | 4.765531  | -3.405838 | -1.482930 |
| 49       | H       | -3.211885 | -3.358403 | -0.405413 |
| 50       | H       | -4.768516 | -3.404722 | 1.481592  |
| 51       | H       | -6.645722 | 0.197614  | -0.021278 |
| 52       | H       | 6.644803  | 0.195143  | 0.020614  |
| 53       | H       | -2.005681 | 0.616413  | -2.554499 |
| 54       | H       | 2.006219  | 0.614769  | 2.555438  |
| 55       | N       | 6.711985  | -1.612940 | -1.970793 |
| 56       | N       | -6.714457 | -1.611232 | 1.969365  |
| 57       | C       | 6.656279  | -2.688532 | -2.947347 |
| 58       | H       | 7.416066  | -2.518467 | -3.711533 |
| 59       | H       | 6.847133  | -3.670167 | -2.490481 |
| 60       | H       | 5.679357  | -2.729673 | -3.447192 |
| 61       | C       | 7.752037  | -0.602575 | -2.072757 |
| 62       | H       | 8.333364  | -0.778042 | -2.979143 |
| 63       | H       | 7.328543  | 0.408968  | -2.134963 |
| 64       | H       | 8.441032  | -0.631201 | -1.216320 |
| 65       | C       | -6.659412 | -2.687079 | 2.945675  |
| 66       | H       | -7.419353 | -2.516927 | 3.709687  |
| 67       | H       | -6.850480 | -3.668540 | 2.488524  |
| 68       | H       | -5.682646 | -2.728682 | 3.445788  |
| 69       | C       | -7.754206 | -0.600545 | 2.071241  |
| 70       | H       | -8.336162 | -0.776305 | 2.977165  |
| 71       | H       | -7.330407 | 0.410826  | 2.134250  |
| 72       | H       | -8.442672 | -0.628481 | 1.214361  |
| 73       | H       | 1.995561  | 5.717079  | 2.536762  |
| 74       | H       | -1.991117 | 5.718933  | -2.535541 |

Cartesian coordinates of the optimized structure of **23**  
 (Terminal hexyl groups were replaced with methyl groups.)

E(RB3LYP) = -2737.38886137 a.u.

Number of imaginary frequencies: 0

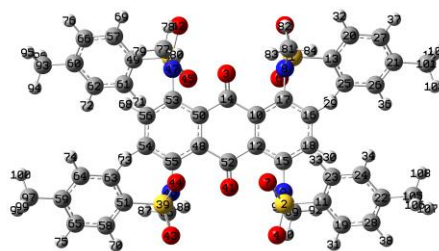

| Atom No. | Element | X        | Y         | Z         |
|----------|---------|----------|-----------|-----------|
| 1        | S       | 2.755151 | 3.910807  | 0.085900  |
| 2        | S       | 2.755077 | -3.910869 | -0.085981 |
| 3        | O       | 0.000002 | 1.884399  | 1.847799  |
| 4        | O       | 2.407974 | -5.104068 | -0.857707 |
| 5        | O       | 2.408029 | 5.104056  | 0.857546  |
| 6        | O       | 2.075605 | 3.532062  | -1.152113 |
| 7        | O       | 2.075499 | -3.532236 | 1.152050  |
| 8        | N       | 2.557005 | 2.603225  | 1.135950  |
| 9        | N       | 2.556882 | -2.603238 | -1.135982 |
| 10       | C       | 1.292317 | 0.625056  | 0.324876  |
| 11       | C       | 4.509779 | -4.038976 | 0.294944  |
| 12       | C       | 1.292318 | -0.625097 | -0.324780 |
| 13       | C       | 4.509855 | 4.038936  | -0.295019 |
| 14       | C       | 0.000009 | 1.156549  | 0.867133  |
| 15       | C       | 2.517863 | -1.285093 | -0.583046 |
| 16       | C       | 3.714471 | 0.640252  | 0.274283  |
| 17       | C       | 2.517882 | 1.285081  | 0.583045  |
| 18       | C       | 3.714469 | -0.640196 | -0.274495 |
| 19       | C       | 5.358109 | -4.727017 | -0.576237 |
| 20       | C       | 5.358062 | 4.727366  | 0.575980  |
| 21       | C       | 7.250948 | 4.198941  | -0.863287 |
| 22       | C       | 7.250875 | -4.198789 | 0.863265  |
| 23       | C       | 5.012165 | -3.439099 | 1.452124  |
| 24       | C       | 6.376378 | -3.521940 | 1.725410  |
| 25       | C       | 5.012360 | 3.438751  | -1.451981 |
| 26       | C       | 6.376581 | 3.521690  | -1.725243 |
| 27       | C       | 6.719603 | 4.798098  | 0.287820  |
| 28       | C       | 6.719660 | -4.797645 | -0.288053 |
| 29       | H       | 4.652975 | 1.148142  | 0.471275  |
| 30       | H       | 4.652978 | -1.148009 | -0.471651 |
| 31       | H       | 4.950645 | -5.218831 | -1.453268 |
| 32       | H       | 4.950504 | 5.219412  | 1.452837  |
| 33       | H       | 4.334456 | -2.932456 | 2.130721  |
| 34       | H       | 6.767224 | -3.060050 | 2.629096  |
| 35       | H       | 4.334740 | 2.931795  | -2.130432 |
| 36       | H       | 6.767519 | 3.059574  | -2.628774 |

| Atom No. | Element | X         | Y         | Z         |
|----------|---------|-----------|-----------|-----------|
| 55       | C       | -2.517799 | -1.285212 | -0.582878 |
| 56       | C       | -3.714444 | 0.640201  | 0.274245  |
| 57       | C       | -5.358074 | 4.727317  | 0.575680  |
| 58       | C       | -5.357905 | -4.727435 | -0.575636 |
| 59       | C       | -7.250937 | -4.198770 | 0.863357  |
| 60       | C       | -7.250967 | 4.198969  | -0.863607 |
| 61       | C       | -5.012380 | 3.438816  | -1.452352 |
| 62       | C       | -6.376600 | 3.521771  | -1.725607 |
| 63       | C       | -5.012379 | -3.438661 | 1.452252  |
| 64       | C       | -6.376647 | -3.521499 | 1.725350  |
| 65       | C       | -6.719479 | -4.798061 | -0.287645 |
| 66       | C       | -6.719618 | 4.798063  | 0.287530  |
| 67       | H       | -4.652915 | -1.148189 | -0.471431 |
| 68       | H       | -4.652963 | 1.148077  | 0.471196  |
| 69       | H       | -4.950513 | 5.219318  | 1.452562  |
| 70       | H       | -4.950253 | -5.219571 | -1.452399 |
| 71       | H       | -4.334762 | 2.931901  | -2.130836 |
| 72       | H       | -6.767539 | 3.059710  | -2.629165 |
| 73       | H       | -4.334829 | -2.931675 | 2.130751  |
| 74       | H       | -6.767675 | -3.059263 | 2.628778  |
| 75       | H       | -7.379491 | -5.336811 | -0.963384 |
| 76       | H       | -7.379679 | 5.336777  | 0.963246  |
| 77       | C       | -2.842884 | 2.760595  | 2.562992  |
| 78       | H       | -2.644938 | 3.795902  | 2.842546  |
| 79       | H       | -3.880800 | 2.497424  | 2.813860  |
| 80       | H       | -2.153688 | 2.119571  | 3.116024  |
| 81       | C       | 2.842746  | 2.760399  | 2.563258  |
| 82       | H       | 2.644889  | 3.795709  | 2.842862  |
| 83       | H       | 2.153417  | 2.119415  | 3.116176  |
| 84       | H       | 3.880604  | 2.497091  | 2.814220  |
| 85       | C       | -2.842879 | -2.760920 | -2.562772 |
| 86       | H       | -2.644123 | -3.796039 | -2.842452 |
| 87       | H       | -3.881062 | -2.498592 | -2.813440 |
| 88       | H       | -2.154336 | -2.119279 | -3.115903 |
| 89       | C       | 2.842898  | -2.760402 | -2.563233 |
| 90       | H       | 2.644254  | -3.795495 | -2.843086 |

|    |   |           |           |           |
|----|---|-----------|-----------|-----------|
| 37 | H | 7.379667  | 5.336851  | 0.963504  |
| 38 | H | 7.379824  | -5.336067 | -0.963900 |
| 39 | S | -2.755013 | -3.910865 | -0.085293 |
| 40 | S | -2.755164 | 3.910781  | 0.085552  |
| 41 | O | 0.000010  | -1.884234 | -1.847882 |
| 42 | O | -2.408007 | 5.104088  | 0.857090  |
| 43 | O | -2.407737 | -5.104229 | -0.856683 |
| 44 | O | -2.075616 | -3.531885 | 1.152731  |
| 45 | O | -2.075640 | 3.531932  | -1.152441 |
| 46 | N | -2.556781 | -2.603458 | -1.135572 |
| 47 | N | -2.557002 | 2.603289  | 1.135725  |
| 48 | C | -1.292268 | -0.625148 | -0.324711 |
| 49 | C | -4.509871 | 4.038930  | -0.295353 |
| 50 | C | -1.292292 | 0.625049  | 0.324858  |
| 51 | C | -4.509761 | -4.038967 | 0.295414  |
| 52 | C | 0.000024  | -1.156546 | -0.867098 |
| 53 | C | -2.517871 | 1.285088  | 0.582944  |
| 54 | C | -3.714415 | -0.640315 | -0.274381 |

|     |   |           |           |           |
|-----|---|-----------|-----------|-----------|
| 91  | H | 2.154238  | -2.118744 | -3.116200 |
| 92  | H | 3.881032  | -2.497898 | -2.813919 |
| 93  | C | -8.721646 | 4.313433  | -1.187362 |
| 94  | H | -9.081033 | 3.437779  | -1.738028 |
| 95  | H | -9.325684 | 4.417705  | -0.280155 |
| 96  | H | -8.918570 | 5.194011  | -1.813105 |
| 97  | C | -8.721648 | -4.313219 | 1.186968  |
| 98  | H | -9.325749 | -4.416294 | 0.279667  |
| 99  | H | -8.918791 | -5.194508 | 1.811656  |
| 100 | H | -9.080792 | -3.438135 | 1.738684  |
| 101 | C | 8.721627  | 4.313396  | -1.187045 |
| 102 | H | 9.325689  | 4.417428  | -0.279824 |
| 103 | H | 9.080957  | 3.437850  | -1.737918 |
| 104 | H | 8.918588  | 5.194110  | -1.812585 |
| 105 | C | 8.721529  | -4.313161 | 1.187162  |
| 106 | H | 8.918123  | -5.192524 | 1.814729  |
| 107 | H | 9.325525  | -4.419531 | 0.280185  |
| 108 | H | 9.081260  | -3.436530 | 1.736057  |
